# Supplementary material for: Proteomic Analysis of Decellularized Extracellular Matrix: Achieving a Competent Biomaterial for Osteogenesis
Source: Biomed Res Int. 2022 Oct 11;2022:6884370. doi: 10.1155/2022/6884370 (PMC9578822; doi:10.1155/2022/6884370)
Supplement: Supplementary Materials — Supporting Information: an independent file is provided containing the following detailed information: Table S1: mass spectrometry-based protein identification and posttranslational modification data and Gene Ontology annotation for protein subsets identified in the different samples analyzed. Supp S1a: protein identifications by shotgun mass spectrometry. Supp S1b: identifications of proteins with the following posttranslational modifications: Cys-Cys, hydroxyproline, sulfation (Y), deamination (N), phosphorylation (ST), and oxidation (M). Supp T2c: Gene Ontology enriched categories for the whole set of identified proteins. Supp T2d: Gene Ontology enriched categories for the set of proteins with identified posttranslational modifications (PTMs). Supp T2e: set of all peptides identified by shotgun mass spectrometry. Supp T2f: set of peptides identified in proteins with posttranslational modifications (PTMs). Supp T2g: Gene Ontology annotation for the whole set of identified proteins. Supp T2h: Gene Ontology annotation for the set of proteins with posttranslational modifications (PTMs). Supp T2i: GO terms enriched for the set of proteins identified in the ECMt. Supp T2j: GO terms enriched for the set of proteins identified in the ECMb. Supp T2k: GO enriched for the set of proteins identified in the ECMp. Table S2: significance values for cell adhesion and proliferation assays. Significant p values for Student's t-test (α = 0.05): (a) cell adhesion after 4 h of incubation and (b) cell proliferation after 4, 8, 12, and 15 days. These measurements were performed using the Alamar Blue assay (BMMSCs MO-58) after continuous and stepwise digestion with trypsin, collagenase, and pepsin. Table S3: significance values for peptides and glycosaminoglycan quantification. Significant p values for Student's t-test (α = 0.05) in order to compare: (a–c) peptide quantification using BCA assay and (d, e) GAG quantification using DMMB assay, performed under continuous and stepwise diges [file 6884370.f1.zip › Suppl Table S2a. PROTEOMICS DATA.txt]

Supp table 2a. Proteome profile of ECMs
Protein IDs	Majority protein IDs	Peptide counts (all)	Peptide counts (razor+unique)	Peptide counts (unique)	Number of proteins	Peptides	Razor + unique peptides	Unique peptides	Peptides col	Peptides ECM0	Peptides ECMp	Razor + unique peptides col	Razor + unique peptides ECM0	Razor + unique peptides ECMp	Unique peptides col	Unique peptides ECM0	Unique peptides ECMp	Sequence coverage %	Unique + razor sequence coverage %	Unique sequence coverage %	Mol. weight kDa	Sequence length	Sequence lengths	Fraction average	Fraction 1	Q-value	Score	Identification type col	Identification type ECM0	Identification type ECMp	Sequence coverage col %	Sequence coverage ECM0 %	Sequence coverage ECMp %	Intensity	Intensity col	Intensity ECM0	Intensity ECMp	LFQ intensity col	LFQ intensity ECM0	LFQ intensity ECMp	MS/MS count col	MS/MS count ECM0	MS/MS count ECMp	MS/MS count	Only identified by site	Reverse	Potential contaminant	id	Peptide IDs
A0A0A0MP88	A0A0A0MP88	1	1	1	1	1	1	1	0	1	0	0	1	0	0	1	0	2.3	2.3	2.3	44,767	398	398	1	1	0.037037	-0.0010933		By MS/MS		0	2.3	0	28360	0	28360	0	0	28727	0	0	3	0	3				0	85
Q5MD62	Q5MD62;A0JNA6	1;1	1;1	1;1	2	1	1	1	1	0	1	1	0	1	1	0	1	2.4	2.4	2.4	42,875	379	379;379	1	2	0.035714	-0.0010933	By MS/MS		By matching	2.4	0	2.4	60289	58089	0	2200	0	0	13017	1	0	0	1				1	106
F1N0E0	F1N0E0;A0JNA8;G3MZP9	1;1;1	1;1;1	1;1;1	3	1	1	1	0	1	0	0	1	0	0	1	0	1	1	1	99,673	897	897;984;1195	1	1	0.034483	-0.0010933		By MS/MS		0	1	0	21919	0	21919	0	0	22203	0	0	1	0	1				2	89
A0JNF4	A0JNF4	1	1	1	1	1	1	1	0	0	1	0	0	1	0	0	1	1.8	1.8	1.8	58,276	506	506	1	1	0.033333	-0.0010933			By MS/MS	0	0	1.8	201560	0	0	201560	0	0	1192600	0	0	1	1				3	80
A0N0X6	A0N0X6	1	1	1	1	1	1	1	0	0	1	0	0	1	0	0	1	1.3	1.3	1.3	80.83	716	716	1	1	0.032258	-0.0010933			By MS/MS	0	0	1.3	16113	0	0	16113	0	0	95332	0	0	1	1				4	16
A2VDQ0	A2VDQ0	1	1	1	1	1	1	1	0	0	1	0	0	1	0	0	1	1.3	1.3	1.3	79,484	676	676	1	1	0.03125	-0.0010933			By MS/MS	0	0	1.3	36260	0	0	36260	0	0	214540	0	0	1	1				5	176
A2VDS4	A2VDS4	1	1	1	1	1	1	1	0	1	0	0	1	0	0	1	0	2.3	2.3	2.3	43,293	388	388	1	2	0.030303	-0.0010933		By MS/MS		0	2.3	0	14752	0	14752	0	0	7471.7	0	0	1	0	1				6	78
A4FUE5	A4FUE5	1	1	1	1	1	1	1	0	0	1	0	0	1	0	0	1	1.4	1.4	1.4	110.71	982	982	1	1	0.029412	-0.0010933			By MS/MS	0	0	1.4	0	0	0	0	0	0	0	0	0	1	1				7	5
A4IFA8	A4IFA8;G3X6K1	1;1	1;1	1;1	2	1	1	1	1	0	0	1	0	0	1	0	0	17.5	17.5	17.5	27,398	251	251;292	1	1	0.038462	0.090411	By MS/MS			17.5	0	0	27541	27541	0	0	27541	0	0	0	0	0	0				8	175
F1N222	F1N222;A5D7C2	1;1	1;1	1;1	2	1	1	1	0	1	0	0	1	0	0	1	0	1.3	1.3	1.3	79,796	688	688;688	1	1	0.028571	-0.0010933		By MS/MS		0	1.3	0	3833800	0	3833800	0	0	3883400	0	0	3	0	3				9	90
Q29S21	Q29S21;Q08D91;M0QVZ6;A5D7M6;Q5XQN5;G3MXL3	1;1;1;1;1;1	1;1;1;1;1;1	1;1;1;1;1;1	6	1	1	1	0	0	1	0	0	1	0	0	1	2.6	2.6	2.6	51,577	466	466;543;573;597;601;616	1	2	0	11,736			By MS/MS	0	0	2.6	0	0	0	0	0	0	0	0	0	2	2				10	147
F1MBA0	F1MBA0;A5D7U0	1;1	1;1	1;1	2	1	1	1	1	0	0	1	0	0	1	0	0	1.4	1.4	1.4	70,056	625	625;625	1	1	0.027778	-0.0010933	By MS/MS			1.4	0	0	1464400	1464400	0	0	1464400	0	0	1	0	0	1				11	127
Q3SYT8	Q3SYT8;A5D9D3	1;1	1;1	1;1	2	1	1	1	0	0	1	0	0	1	0	0	1	1.3	1.3	1.3	77.02	678	678;680	1	1	0.027027	-0.0010933			By MS/MS	0	0	1.3	43707	0	0	43707	0	0	258600	0	0	1	1				12	182
A6QLB8	A6QLB8	1	1	1	1	1	1	1	0	1	0	0	1	0	0	1	0	10.1	10.1	10.1	52,263	495	495	1	1	0	46,332		By MS/MS		0	10.1	0	9785.4	0	9785.4	0	0	9912.1	0	0	0	0	0				13	104
A6QLE1	A6QLE1	1	1	1	1	1	1	1	0	0	1	0	0	1	0	0	1	0.8	0.8	0.8	123.9	1098	1098	1	1	0.026316	-0.0010933			By MS/MS	0	0	0.8	67727	0	0	67727	0	0	400720	0	0	1	1				14	133
A6QLF4	A6QLF4	1	1	1	1	1	1	1	1	0	0	1	0	0	1	0	0	11	11	11	41,056	372	372	1	1	0	44,785	By MS/MS			11	0	0	15038	15038	0	0	15038	0	0	0	0	0	0				15	93
A6QLN5	A6QLN5	1	1	1	1	1	1	1	0	1	0	0	1	0	0	1	0	4.2	4.2	4.2	54,084	479	479	1	1	0	0.18631		By MS/MS		0	4.2	0	413270	0	413270	0	0	418620	0	0	1	0	1				16	64
A6QNZ5	A6QNZ5	1	1	1	1	1	1	1	0	0	1	0	0	1	0	0	1	1.2	1.2	1.2	86.26	762	762	1	1	0.025641	-0.0010933			By MS/MS	0	0	1.2	19794	0	0	19794	0	0	117110	0	0	1	1				17	81
A6QP16	A6QP16	1	1	1	1	1	1	1	0	0	1	0	0	1	0	0	1	1.3	1.3	1.3	81,046	708	708	1	1	0.025	-0.0010933			By MS/MS	0	0	1.3	21389	0	0	21389	0	0	126550	0	0	1	1				18	149
A6QP30	A6QP30	1	1	1	1	1	1	1	0	0	1	0	0	1	0	0	1	1.6	1.6	1.6	60,039	548	548	1	1	0.02439	-0.0010933			By MS/MS	0	0	1.6	37368	0	0	37368	0	0	221090	0	0	1	1				19	171
A6QPM5	A6QPM5	1	1	1	1	1	1	1	1	0	0	1	0	0	1	0	0	1.4	1.4	1.4	71,068	640	640	1	1	0.02381	-0.0010933	By MS/MS			1.4	0	0	84388	84388	0	0	84388	0	0	1	0	0	1				20	141
F1N1H2	F1N1H2;A6QQ70	1;1	1;1	1;1	2	1	1	1	1	0	0	1	0	0	1	0	0	0.8	0.8	0.8	112.48	1066	1066;1066	1	1	0.023256	-0.0010933	By MS/MS			0.8	0	0	315270	315270	0	0	315270	0	0	3	0	0	3				21	18
A6QR40	A6QR40	1	1	1	1	1	1	1	0	1	0	0	1	0	0	1	0	1.4	1.4	1.4	73,957	652	652	1	1	0.022727	-0.0010933		By MS/MS		0	1.4	0	11799	0	11799	0	0	11952	0	0	1	0	1				22	54
A7MAZ2	A7MAZ2	1	1	1	1	1	1	1	0	1	0	0	1	0	0	1	0	3.3	3.3	3.3	31,355	274	274	1	1	0.022222	-0.0010933		By MS/MS		0	3.3	0	19100	0	19100	0	0	19348	0	0	1	0	1				23	153
A7YWN4	A7YWN4	1	1	1	1	1	1	1	1	0	0	1	0	0	1	0	0	2.8	2.8	2.8	35,996	323	323	1	1	0.021739	-0.0010933	By MS/MS			2.8	0	0	53190	53190	0	0	53190	0	0	1	0	0	1				24	42
E1B6X6	E1B6X6	1	1	1	1	1	1	1	0	0	1	0	0	1	0	0	1	0.6	0.6	0.6	170.57	1482	1482	1	1	0.021277	-0.0010933			By MS/MS	0	0	0.6	48980	0	0	48980	0	0	289800	0	0	1	1				25	180
G3N381	G3N381;E1B6Z9	1;1	1;1	1;1	2	1	1	1	0	0	1	0	0	1	0	0	1	1.5	1.5	1.5	67,043	605	605;1081	1	1	0.020833	-0.0010933			By MS/MS	0	0	1.5	12849	0	0	12849	0	0	76023	0	0	1	1				26	32
E1B754	E1B754	1	1	1	1	1	1	1	0	1	0	0	1	0	0	1	0	0.5	0.5	0.5	186.69	1710	1710	1	2	0.020408	-0.0010933		By MS/MS		0	0.5	0	557220	0	557220	0	0	285770	0	0	18	0	18				27	49
G3MXQ9	G3MXQ9;E1B7T8	1;1	1;1	1;1	2	1	1	1	0	1	0	0	1	0	0	1	0	3	3	3	35,025	299	299;303	1	1	0.02	-0.0010933		By MS/MS		0	3	0	55310	0	55310	0	0	56027	0	0	1	0	1				28	102
E1B7W2	E1B7W2	1	1	1	1	1	1	1	1	0	0	1	0	0	1	0	0	3.2	3.2	3.2	29,958	285	285	1	1	0.019608	-0.0010933	By MS/MS			3.2	0	0	28287	28287	0	0	28287	0	0	1	0	0	1				29	150
E1B847	E1B847	1	1	1	1	1	1	1	0	0	1	0	0	1	0	0	1	0.6	0.6	0.6	164.16	1509	1509	1	1	0.019231	-0.0010933			By MS/MS	0	0	0.6	28089	0	0	28089	0	0	166190	0	0	1	1				30	11
E1B8C2	E1B8C2	1	1	1	1	1	1	1	0	0	1	0	0	1	0	0	1	1.1	1.1	1.1	93,633	847	847	1	1	0.018868	-0.0010933			By MS/MS	0	0	1.1	12323	0	0	12323	0	0	72911	0	0	1	1				31	116
E1B9Q8	E1B9Q8	1	1	1	1	1	1	1	0	1	0	0	1	0	0	1	0	0.6	0.6	0.6	151.04	1411	1411	1	1	0.018519	-0.0010933		By MS/MS		0	0.6	0	7025	0	7025	0	0	7116	0	0	1	0	1				32	21
E1BAN6	E1BAN6	1	1	1	1	1	1	1	0	0	1	0	0	1	0	0	1	3.1	3.1	3.1	33,809	295	295	1	1	0.018182	-0.0010933			By MS/MS	0	0	3.1	115130	0	0	115130	0	0	681200	0	0	2	2				33	53
F1MGL2	F1MGL2;E1BB02;E1BIQ2	1;1;1	1;1;1	1;1;1	3	1	1	1	1	0	0	1	0	0	1	0	0	1.1	1.1	1.1	88,191	807	807;898;1188	1	1	0.017857	-0.0010933	By MS/MS			1.1	0	0	39914	39914	0	0	39914	0	0	1	0	0	1				34	161
E1BB91	E1BB91;G3N126;G3N3E4	2;1;1	2;1;1	2;1;1	3	2	2	2	0	0	2	0	0	2	0	0	2	0.7	0.7	0.7	342.4	3170	3170;1238;1703	1	4	0	32,159			By MS/MS	0	0	0.7	22255	0	0	22255	0	0	131670	0	0	6	6				35	6;98
F1MCM5	F1MCM5;E1BBP4	1;1	1;1	1;1	2	1	1	1	0	1	0	0	1	0	0	1	0	1.9	1.9	1.9	52,203	466	466;915	1	1	0.017544	-0.0010933		By MS/MS		0	1.9	0	14895	0	14895	0	0	15088	0	0	1	0	1				36	13
E1BBW2	E1BBW2	1	1	1	1	1	1	1	1	0	0	1	0	0	1	0	0	1.5	1.5	1.5	107.72	909	909	1	1	0.017241	-0.0010933	By MS/MS			1.5	0	0	0	0	0	0	0	0	0	1	0	0	1				37	109
E1BCX0	E1BCX0	1	1	1	1	1	1	1	0	0	1	0	0	1	0	0	1	3.9	3.9	3.9	25,601	233	233	1	1	0.016949	-0.0010933			By MS/MS	0	0	3.9	76979	0	0	76979	0	0	455450	0	0	1	1				38	55
E1BD12	E1BD12	1	1	1	1	1	1	1	0	0	1	0	0	1	0	0	1	0.7	0.7	0.7	132.94	1255	1255	1	1	0.016667	-0.0010933			By MS/MS	0	0	0.7	38365	0	0	38365	0	0	226990	0	0	5	5				39	91
E1BD25	E1BD25	1	1	1	1	1	1	1	1	0	0	1	0	0	1	0	0	5.3	5.3	5.3	95,999	904	904	1	1	0	0.83535	By MS/MS			5.3	0	0	6121.3	6121.3	0	0	6121.3	0	0	0	0	0	0				40	1
E1BDM8	E1BDM8	1	1	1	1	1	1	1	0	0	1	0	0	1	0	0	1	2.9	2.9	2.9	54,376	483	483	1	1	0.016393	-0.0010933			By MS/MS	0	0	2.9	0	0	0	0	0	0	0	0	0	1	1				41	66
E1BE33	E1BE33	1	1	1	1	1	1	1	1	0	0	1	0	0	1	0	0	0.7	0.7	0.7	135.76	1209	1209	1	1	0.016129	-0.0010933	By MS/MS			0.7	0	0	105090	105090	0	0	105090	0	0	2	0	0	2				42	50
E1BEI7	E1BEI7	1	1	1	1	1	1	1	0	0	1	0	0	1	0	0	1	2	2	2	49,924	446	446	1	1	0.015873	-0.0010933			By MS/MS	0	0	2	59609	0	0	59609	0	0	352680	0	0	1	1				43	117
E1BEJ7	E1BEJ7	1	1	1	1	1	1	1	0	1	0	0	1	0	0	1	0	1.6	1.6	1.6	86,554	792	792	1	1	0	13,469		By MS/MS		0	1.6	0	0	0	0	0	0	0	0	0	1	0	1				44	120
E1BEK4	E1BEK4	1	1	1	1	1	1	1	0	0	1	0	0	1	0	0	1	0.6	0.6	0.6	162.96	1470	1470	1	1	0.015625	-0.0010933			By MS/MS	0	0	0.6	31109	0	0	31109	0	0	184060	0	0	1	1				45	134
E1BES5	E1BES5	1	1	1	1	1	1	1	1	0	0	1	0	0	1	0	0	1.7	1.7	1.7	63,219	545	545	1	1	0.015385	-0.0010933	By MS/MS			1.7	0	0	19976	19976	0	0	19976	0	0	1	0	0	1				46	73
E1BFB0	E1BFB0	1	1	1	1	1	1	1	0	0	1	0	0	1	0	0	1	0.4	0.4	0.4	284.57	2472	2472	1	1	0.015152	-0.0010933			By MS/MS	0	0	0.4	24715	0	0	24715	0	0	146230	0	0	1	1				47	135
E1BG78	E1BG78	1	1	1	1	1	1	1	1	0	0	1	0	0	1	0	0	1.1	1.1	1.1	86,923	786	786	1	1	0.014925	-0.0010933	By MS/MS			1.1	0	0	51506	51506	0	0	51506	0	0	1	0	0	1				48	110
E1BIF6	E1BIF6	1	1	1	1	1	1	1	0	0	1	0	0	1	0	0	1	0.2	0.2	0.2	484.75	4332	4332	1	1	0.014706	-0.0010933			By MS/MS	0	0	0.2	85396	0	0	85396	0	0	505260	0	0	3	3				49	154
E1BIR1	E1BIR1	1	1	1	1	1	1	1	0	1	0	0	1	0	0	1	0	0.7	0.7	0.7	150.14	1335	1335	1	1	0.014493	-0.0010933		By MS/MS		0	0.7	0	162920	0	162920	0	0	165020	0	0	1	0	1				50	162
E1BIT2	E1BIT2	1	1	1	1	1	1	1	0	0	1	0	0	1	0	0	1	1.9	1.9	1.9	51,117	463	463	1	1	0.014286	-0.0010933			By MS/MS	0	0	1.9	67559	0	0	67559	0	0	399720	0	0	1	1				51	136
E1BJF4	E1BJF4	1	1	1	1	1	1	1	0	0	1	0	0	1	0	0	1	0.7	0.7	0.7	152.52	1351	1351	1	1	0.014085	-0.0010933			By MS/MS	0	0	0.7	20072	0	0	20072	0	0	118760	0	0	1	1				52	131
E1BJU4	E1BJU4	1	1	1	1	1	1	1	0	0	1	0	0	1	0	0	1	1.4	1.4	1.4	73,763	646	646	1	1	0.013889	-0.0010933			By MS/MS	0	0	1.4	30599	0	0	30599	0	0	181040	0	0	1	1				53	27
E1BK89	E1BK89	1	1	1	1	1	1	1	1	0	1	1	0	1	1	0	1	2.1	2.1	2.1	219.11	1928	1928	1	2	0	0.41789	By MS/MS		By matching	2.1	0	2.1	42736	34480	0	8255.6	0	0	48845	0	0	0	0				54	164
E1BKJ5	E1BKJ5	1	1	1	1	1	1	1	1	0	0	1	0	0	1	0	0	0.2	0.2	0.2	434.23	3831	3831	1	1	0.013699	-0.0010933	By MS/MS			0.2	0	0	115480	115480	0	0	115480	0	0	1	0	0	1				55	71
E1BKN0	E1BKN0	1	1	1	1	1	1	1	1	0	0	1	0	0	1	0	0	0.3	0.3	0.3	293.36	2711	2711	1	1	0.013514	-0.0010933	By MS/MS			0.3	0	0	21453	21453	0	0	21453	0	0	1	0	0	1				56	101
E1BKY0	E1BKY0	1	1	1	1	1	1	1	1	0	0	1	0	0	1	0	0	1.3	1.3	1.3	120.56	1039	1039	1	4	0	0.94526	By MS/MS			1.3	0	0	0	0	0	0	0	0	0	4	0	0	4				57	108
E1BKZ0	E1BKZ0	1	1	1	1	1	1	1	0	0	1	0	0	1	0	0	1	0.3	0.3	0.3	327.24	2897	2897	1	1	0.013333	-0.0010933			By MS/MS	0	0	0.3	20072	0	0	20072	0	0	118760	0	0	1	1				58	7
E1BL01	E1BL01	1	1	1	1	1	1	1	0	1	0	0	1	0	0	1	0	1.4	1.4	1.4	66,037	628	628	1	2	0.013158	-0.0010933		By MS/MS		0	1.4	0	33079	0	33079	0	0	16754	0	0	1	0	1				59	173
E1BL14	E1BL14;F1MBT3	1;1	1;1	1;1	2	1	1	1	0	1	0	0	1	0	0	1	0	2.7	2.7	2.7	36,186	331	331;575	1	1	0.012987	-0.0010933		By MS/MS		0	2.7	0	706320	0	706320	0	0	715460	0	0	6	0	6				60	83
E1BLN6	E1BLN6	1	1	1	1	1	1	1	0	1	0	0	1	0	0	1	0	2.5	2.5	2.5	61,715	563	563	1	1	0.012821	-0.0010933		By MS/MS		0	2.5	0	0	0	0	0	0	0	0	0	1	0	1				61	140
E1BLP0	E1BLP0	1	1	1	1	1	1	1	0	0	1	0	0	1	0	0	1	1.3	1.3	1.3	76,502	690	690	1	1	0.012658	-0.0010933			By MS/MS	0	0	1.3	25044	0	0	25044	0	0	148180	0	0	1	1				62	3
E1BLY2	E1BLY2	1	1	1	1	1	1	1	0	0	1	0	0	1	0	0	1	2.4	2.4	2.4	42,381	375	375	1	1	0.0125	-0.0010933			By MS/MS	0	0	2.4	31799	0	0	31799	0	0	188140	0	0	1	1				63	156
E1BLZ0	E1BLZ0	1	1	1	1	1	1	1	0	1	0	0	1	0	0	1	0	1.3	1.3	1.3	81,027	709	709	1	1	0.012346	-0.0010933		By MS/MS		0	1.3	0	24672	0	24672	0	0	24991	0	0	1	0	1				64	36
E1BM42	E1BM42	1	1	1	1	1	1	1	0	0	1	0	0	1	0	0	1	1.2	1.2	1.2	133.96	1212	1212	1	1	0.012195	-0.0010933			By MS/MS	0	0	1.2	0	0	0	0	0	0	0	0	0	1	1				65	12
E1BMC4	E1BMC4	1	1	1	1	1	1	1	0	0	1	0	0	1	0	0	1	0.5	0.5	0.5	206.6	1861	1861	1	1	0.012048	-0.0010933			By MS/MS	0	0	0.5	25966	0	0	25966	0	0	153630	0	0	1	1				66	43
E1BMV0	E1BMV0	1	1	1	1	1	1	1	0	0	1	0	0	1	0	0	1	4	4	4	24,661	225	225	1	1	0.011905	-0.0010933			By MS/MS	0	0	4	40129	0	0	40129	0	0	237430	0	0	5	5				67	58
E1BN90	E1BN90	1	1	1	1	1	1	1	1	0	0	1	0	0	1	0	0	1.4	1.4	1.4	110.63	969	969	1	1	0.011765	-0.0010933	By MS/MS			1.4	0	0	0	0	0	0	0	0	0	1	0	0	1				68	99
E1BND0	E1BND0	1	1	1	1	1	1	1	1	0	0	1	0	0	1	0	0	0.3	0.3	0.3	294.17	2617	2617	1	1	0.011628	-0.0010933	By MS/MS			0.3	0	0	38133	38133	0	0	38133	0	0	4	0	0	4				69	121
E1BNH3	E1BNH3	1	1	1	1	1	1	1	0	0	1	0	0	1	0	0	1	1	1	1	102.2	919	919	1	1	0.011494	-0.0010933			By MS/MS	0	0	1	36536	0	0	36536	0	0	216170	0	0	2	2				70	112
E1BNR0	E1BNR0	1	1	1	1	1	1	1	0	0	1	0	0	1	0	0	1	0.2	0.2	0.2	515.75	4567	4567	1	1	0.011364	-0.0010933			By MS/MS	0	0	0.2	15783	0	0	15783	0	0	93380	0	0	1	1				71	44
E1BNZ0	E1BNZ0;G3N205	1;1	1;1	1;1	2	1	1	1	1	0	0	1	0	0	1	0	0	0.9	0.9	0.9	162.89	1521	1521;1542	1	1	0.011236	-0.0010933	By MS/MS			0.9	0	0	0	0	0	0	0	0	0	1	0	0	1				72	86
E1BP31	E1BP31	1	1	1	1	1	1	1	0	0	1	0	0	1	0	0	1	1.1	1.1	1.1	87,163	786	786	1	1	0.011111	-0.0010933			By MS/MS	0	0	1.1	64447	0	0	64447	0	0	381310	0	0	1	1				73	94
E1BPX1	E1BPX1	1	1	1	1	1	1	1	0	0	1	0	0	1	0	0	1	0.2	0.2	0.2	423.83	3758	3758	1	1	0.010989	-0.0010933			By MS/MS	0	0	0.2	18032	0	0	18032	0	0	106690	0	0	1	1				74	165
F1MBS3	F1MBS3;P55906	1;1	1;1	1;1	2	1	1	1	0	0	1	0	0	1	0	0	1	1.4	1.4	1.4	72,251	661	661;683	1	1	0	0.28317			By MS/MS	0	0	1.4	26164	0	0	26164	0	0	154800	0	0	4	4				75	61
F1MBW3	F1MBW3	1	1	1	1	1	1	1	0	0	1	0	0	1	0	0	1	1.2	1.2	1.2	80,609	722	722	1	1	0.01087	-0.0010933			By MS/MS	0	0	1.2	100860	0	0	100860	0	0	596780	0	0	1	1				76	172
G3MWL5	G3MWL5;F1MCS6;F1N2F7	1;1;1	1;1;1	1;1;1	3	1	1	1	0	1	0	0	1	0	0	1	0	3	3	3	53,616	465	465;564;566	1	1	0.010753	-0.0010933		By MS/MS		0	3	0	0	0	0	0	0	0	0	0	1	0	1				77	70
F1MD77	F1MD77	1	1	1	1	1	1	1	0	0	1	0	0	1	0	0	1	0.6	0.6	0.6	177.69	1608	1608	1	1	0.010638	-0.0010933			By MS/MS	0	0	0.6	79305	0	0	79305	0	0	469220	0	0	1	1				78	163
F1MDF3	F1MDF3	1	1	1	1	1	1	1	1	0	0	1	0	0	1	0	0	0.5	0.5	0.5	183.78	1661	1661	1	1	0.010526	-0.0010933	By MS/MS			0.5	0	0	83776	83776	0	0	83776	0	0	1	0	0	1				79	75
F1MDJ4	F1MDJ4	1	1	1	1	1	1	1	0	0	1	0	0	1	0	0	1	1.4	1.4	1.4	73,061	631	631	1	1	0.010417	-0.0010933			By MS/MS	0	0	1.4	15596	0	0	15596	0	0	92277	0	0	1	1				80	82
F1MF78	F1MF78	1	1	1	1	1	1	1	0	0	1	0	0	1	0	0	1	0.1	0.1	0.1	789.33	6843	6843	1	1	0.010309	-0.0010933			By MS/MS	0	0	0.1	12742	0	0	12742	0	0	75391	0	0	1	1				81	129
F1MFR9	F1MFR9	1	1	1	1	1	1	1	0	1	0	0	1	0	0	1	0	1.3	1.3	1.3	79.58	708	708	1	1	0.010204	-0.0010933		By MS/MS		0	1.3	0	29940	0	29940	0	0	30327	0	0	1	0	1				82	138
F1MHL9	F1MHL9	1	1	1	1	1	1	1	1	0	0	1	0	0	1	0	0	1.3	1.3	1.3	81.57	696	696	1	1	0.010101	-0.0010933	By MS/MS			1.3	0	0	47416	47416	0	0	47416	0	0	2	0	0	2				83	38
F1MHU8	F1MHU8	1	1	1	1	1	1	1	0	0	1	0	0	1	0	0	1	0.9	0.9	0.9	107.16	981	981	1	1	0.01	-0.0010933			By MS/MS	0	0	0.9	12024	0	0	12024	0	0	71140	0	0	1	1				84	79
F1MI56	F1MI56	1	1	1	1	1	1	1	0	0	1	0	0	1	0	0	1	0.3	0.3	0.3	275.01	2614	2614	1	1	0.009901	-0.0010933			By MS/MS	0	0	0.3	91786	0	0	91786	0	0	543060	0	0	1	1				85	67
F1MI83	F1MI83	1	1	1	1	1	1	1	1	0	0	1	0	0	1	0	0	2.3	2.3	2.3	44,198	385	385	1	1	0.0098039	-0.0010933	By MS/MS			2.3	0	0	259740	259740	0	0	259740	0	0	1	0	0	1				86	95
F1MIB7	F1MIB7	1	1	1	1	1	1	1	0	0	1	0	0	1	0	0	1	0.7	0.7	0.7	145.04	1365	1365	1	1	0.0097087	-0.0010933			By MS/MS	0	0	0.7	24540	0	0	24540	0	0	145190	0	0	1	1				87	152
F1MIU7	F1MIU7	1	1	1	1	1	1	1	0	0	1	0	0	1	0	0	1	1.3	1.3	1.3	73,429	677	677	1	1	0.0096154	-0.0010933			By MS/MS	0	0	1.3	78122	0	0	78122	0	0	462220	0	0	2	2				88	2
F1MJ64	F1MJ64	1	1	1	1	1	1	1	0	1	0	0	1	0	0	1	0	3.4	3.4	3.4	29,409	266	266	1	1	0.0095238	-0.0010933		By MS/MS		0	3.4	0	109180	0	109180	0	0	110590	0	0	3	0	3				89	137
F1MKV4	F1MKV4;F1MY14	1;1	1;1	1;1	2	1	1	1	0	0	1	0	0	1	0	0	1	0.5	0.5	0.5	202.78	1889	1889;1890	1	1	0.009434	-0.0010933			By MS/MS	0	0	0.5	62883	0	0	62883	0	0	372060	0	0	1	1				90	144
F1ML17	F1ML17	1	1	1	1	1	1	1	1	0	0	1	0	0	1	0	0	3.6	3.6	3.6	27,662	250	250	1	1	0.0093458	-0.0010933	By MS/MS			3.6	0	0	16306	16306	0	0	16306	0	0	1	0	0	1				91	74
F1ML80	F1ML80	1	1	1	1	1	1	1	1	0	0	1	0	0	1	0	0	14.1	14.1	14.1	33,876	319	319	1	1	0	0.34764	By MS/MS			14.1	0	0	30015	30015	0	0	30015	0	0	0	0	0	0				92	22
F1MLY7	F1MLY7	1	1	1	1	1	1	1	1	1	0	1	1	0	1	1	0	0.3	0.3	0.3	299.72	2626	2626	1	2	0.0092593	-0.0010933	By MS/MS	By MS/MS		0.3	0.3	0	86161	56040	30121	0	0	30511	0	1	1	0	2				93	113
F1MM78	F1MM78	1	1	1	1	1	1	1	1	0	0	1	0	0	1	0	0	2	2	2	79,065	710	710	1	1	0.0091743	-0.0010933	By MS/MS			2	0	0	0	0	0	0	0	0	0	1	0	0	1				94	119
F1MMP9	F1MMP9	1	1	1	1	1	1	1	1	0	0	1	0	0	1	0	0	1.7	1.7	1.7	90,642	820	820	1	1	0.0090909	-0.0010933	By MS/MS			1.7	0	0	0	0	0	0	0	0	0	1	0	0	1				95	45
Q3ZCJ7	Q3ZCJ7;F1MNF8;P81947;F2Z4C1;Q2HJ86	1;1;1;1;1	1;1;1;1;1	1;1;1;1;1	5	1	1	1	0	0	1	0	0	1	0	0	1	3.3	3.3	3.3	49,857	449	449;449;451;451;452	1	1	0	119.86			By MS/MS	0	0	3.3	59280	0	0	59280	0	0	350740	0	0	7	7				96	8
F1MP61	F1MP61	1	1	1	1	1	1	1	1	0	0	1	0	0	1	0	0	3.1	3.1	3.1	46,621	385	385	1	1	0.04	0.094309	By MS/MS			3.1	0	0	0	0	0	0	0	0	0	1	0	0	1				97	56
F1MPF3	F1MPF3	1	1	1	1	1	1	1	0	1	0	0	1	0	0	1	0	0.3	0.3	0.3	347.58	3160	3160	1	1	0.009009	-0.0010933		By MS/MS		0	0.3	0	304110	0	304110	0	0	308050	0	0	1	0	1				98	35
Q27974	Q27974;F1MPP5	1;1	1;1	1;1	2	1	1	1	0	0	1	0	0	1	0	0	1	1	1	1	99,511	910	910;910	1	1	0.0089286	-0.0010933			By MS/MS	0	0	1	27261	0	0	27261	0	0	161290	0	0	1	1				99	19
F1MPW8	F1MPW8	1	1	1	1	1	1	1	0	0	1	0	0	1	0	0	1	0.3	0.3	0.3	394.08	3586	3586	1	1	0.0088496	-0.0010933			By MS/MS	0	0	0.3	33553	0	0	33553	0	0	198520	0	0	1	1				100	111
F1MQ30	F1MQ30	1	1	1	1	1	1	1	0	0	1	0	0	1	0	0	1	0.6	0.6	0.6	161.04	1434	1434	1	1	0.0087719	-0.0010933			By MS/MS	0	0	0.6	17788	0	0	17788	0	0	105240	0	0	1	1				101	60
F1MQ44	F1MQ44	1	1	1	1	1	1	1	1	0	0	1	0	0	1	0	0	3.8	3.8	3.8	127.07	1112	1112	1	1	0	42,596	By MS/MS			3.8	0	0	12600	12600	0	0	12600	0	0	0	0	0	0				102	157
F1MQ65	F1MQ65	1	1	1	1	1	1	1	0	1	0	0	1	0	0	1	0	0.8	0.8	0.8	126.98	1108	1108	1	1	0.0086957	-0.0010933		By MS/MS		0	0.8	0	3269.5	0	3269.5	0	0	3311.8	0	0	1	0	1				103	142
F1MQ84	F1MQ84	1	1	1	1	1	1	1	0	0	1	0	0	1	0	0	1	0.4	0.4	0.4	264.77	2347	2347	1	1	0.0086207	-0.0010933			By MS/MS	0	0	0.4	4777.7	0	0	4777.7	0	0	28268	0	0	1	1				104	132
F1MRA0	F1MRA0	1	1	1	1	1	1	1	1	0	0	1	0	0	1	0	0	10	10	10	44,782	399	399	1	1	0	0.41789	By MS/MS			10	0	0	10505	10505	0	0	10505	0	0	0	0	0	0				105	100
F1MRZ5	F1MRZ5;F1MRZ6	1;1	1;1	1;1	2	1	1	1	0	0	1	0	0	1	0	0	1	0.5	0.5	0.5	191.15	1746	1746;2231	1	2	0	2,763			By MS/MS	0	0	0.5	69489	0	0	69489	0	0	219480	0	0	4	4				106	20
F1MT78	F1MT78	1	1	1	1	1	1	1	0	1	0	0	1	0	0	1	0	2.3	2.3	2.3	41,766	396	396	1	1	0.008547	-0.0010933		By MS/MS		0	2.3	0	304110	0	304110	0	0	308050	0	0	1	0	1				107	125
F1MTH3	F1MTH3	1	1	1	1	1	1	1	0	0	1	0	0	1	0	0	1	0.5	0.5	0.5	185.52	1669	1669	1	1	0.0084746	-0.0010933			By MS/MS	0	0	0.5	72078	0	0	72078	0	0	426460	0	0	1	1				108	34
F1MU52	F1MU52;Q2T9M1;F1N6J2	1;1;1	1;1;1	1;1;1	3	1	1	1	0	0	1	0	0	1	0	0	1	2.5	2.5	2.5	38,901	355	355;417;417	1	1	0.0084034	-0.0010933			By MS/MS	0	0	2.5	44385	0	0	44385	0	0	262610	0	0	1	1				109	41
F1MW01	F1MW01	1	1	1	1	1	1	1	1	0	0	1	0	0	1	0	0	0.6	0.6	0.6	230.94	2109	2109	1	3	0	17,532	By MS/MS			0.6	0	0	0	0	0	0	0	0	0	3	0	0	3				110	24
F1MWB8	F1MWB8	1	1	1	1	1	1	1	1	0	0	1	0	0	1	0	0	0.7	0.7	0.7	241.25	2147	2147	1	1	0.0083333	-0.0010933	By MS/MS			0.7	0	0	0	0	0	0	0	0	0	1	0	0	1				111	9
F1MWX8	F1MWX8	1	1	1	1	1	1	1	0	1	0	0	1	0	0	1	0	3.9	3.9	3.9	41,025	362	362	1	1	0.0082645	-0.0010933		By MS/MS		0	3.9	0	0	0	0	0	0	0	0	0	1	0	1				112	15
F1MX94	F1MX94	1	1	1	1	1	1	1	0	0	1	0	0	1	0	0	1	6.2	6.2	6.2	16,363	145	145	1	1	0.0081967	-0.0010933			By MS/MS	0	0	6.2	62847	0	0	62847	0	0	371840	0	0	1	1				113	107
F1MY85	F1MY85	1	1	1	1	1	1	1	1	0	0	1	0	0	1	0	0	0.5	0.5	0.5	189.04	1677	1677	1	1	0.0081301	-0.0010933	By MS/MS			0.5	0	0	17175	17175	0	0	17175	0	0	1	0	0	1				114	105
F1N0C4	F1N0C4	1	1	1	1	1	1	1	0	1	0	0	1	0	0	1	0	4.3	4.3	4.3	24,667	211	211	1	1	0.0080645	-0.0010933		By MS/MS		0	4.3	0	6007900	0	6007900	0	0	6085700	0	0	1	0	1				115	87
F1N0F7	F1N0F7	1	1	1	1	1	1	1	0	0	1	0	0	1	0	0	1	2.1	2.1	2.1	48,971	429	429	1	1	0.008	-0.0010933			By MS/MS	0	0	2.1	22859	0	0	22859	0	0	135250	0	0	1	1				116	177
F1N0P2	F1N0P2	1	1	1	1	1	1	1	1	0	0	1	0	0	1	0	0	2.3	2.3	2.3	44,402	392	392	1	1	0.0079365	-0.0010933	By MS/MS			2.3	0	0	147610	147610	0	0	147610	0	0	1	0	0	1				117	178
F1N0Z3	F1N0Z3	1	1	1	1	1	1	1	0	1	0	0	1	0	0	1	0	3.2	3.2	3.2	31,252	279	279	1	1	0.007874	-0.0010933		By MS/MS		0	3.2	0	591100	0	591100	0	0	598760	0	0	1	0	1				118	143
F1N1C7	F1N1C7	1	1	1	1	1	1	1	0	1	0	0	1	0	0	1	0	0.8	0.8	0.8	131.84	1170	1170	1	1	0.0078125	-0.0010933		By MS/MS		0	0.8	0	36415	0	36415	0	0	36886	0	0	1	0	1				119	139
F1N1C9	F1N1C9	1	1	1	1	1	1	1	0	0	1	0	0	1	0	0	1	0.5	0.5	0.5	187.92	1658	1658	1	1	0.0077519	-0.0010933			By MS/MS	0	0	0.5	70850	0	0	70850	0	0	419190	0	0	1	1				120	170
F1N1E2	F1N1E2	1	1	1	1	1	1	1	0	0	1	0	0	1	0	0	1	2.4	2.4	2.4	40,619	371	371	1	1	0.0076923	-0.0010933			By MS/MS	0	0	2.4	28089	0	0	28089	0	0	166190	0	0	1	1				121	118
Q9GLE4	Q9GLE4;F1N1E3	1;1	1;1	1;1	2	1	1	1	0	0	1	0	0	1	0	0	1	1.5	1.5	1.5	65,882	582	582;582	1	1	0.0076336	-0.0010933			By MS/MS	0	0	1.5	47692	0	0	47692	0	0	282180	0	0	1	1				122	181
F1N1R4	F1N1R4	1	1	1	1	1	1	1	0	0	1	0	0	1	0	0	1	0.9	0.9	0.9	108.17	951	951	1	1	0.0075758	-0.0010933			By MS/MS	0	0	0.9	79514	0	0	79514	0	0	470450	0	0	1	1				123	52
F1N1Z2	F1N1Z2	1	1	1	1	1	1	1	1	0	1	1	0	1	1	0	1	0.7	0.7	0.7	157.58	1375	1375	1	2	0.0075188	-0.0010933	By MS/MS		By matching	0.7	0	0.7	62281	53795	0	8486.3	0	0	50210	3	0	0	3				124	40
F1N2M2	F1N2M2	1	1	1	1	1	1	1	1	0	0	1	0	0	1	0	0	0.5	0.5	0.5	182.01	1670	1670	1	1	0.0074627	-0.0010933	By MS/MS			0.5	0	0	35051	35051	0	0	35051	0	0	1	0	0	1				125	123
F1N3I3	F1N3I3	1	1	1	1	1	1	1	1	0	0	1	0	0	1	0	0	3.6	3.6	3.6	140.39	1287	1287	1	1	0.041667	0.14821	By MS/MS			3.6	0	0	10046	10046	0	0	10046	0	0	0	0	0	0				126	25
F1N3I6	F1N3I6	1	1	1	1	1	1	1	1	0	0	1	0	0	1	0	0	0.8	0.8	0.8	119.64	1067	1067	1	1	0.0074074	-0.0010933	By MS/MS			0.8	0	0	26462	26462	0	0	26462	0	0	1	0	0	1				127	29
F1N3U6	F1N3U6	1	1	1	1	1	1	1	1	0	1	1	0	1	1	0	1	1.3	1.3	1.3	77,971	699	699	1	2	0.0073529	-0.0010933	By MS/MS		By matching	1.3	0	1.3	102270	49942	0	52328	0	0	309610	1	0	0	1				128	84
F1N446	F1N446	1	1	1	1	1	1	1	1	0	0	1	0	0	1	0	0	0.9	0.9	0.9	111.29	1007	1007	1	1	0.0072993	-0.0010933	By MS/MS			0.9	0	0	239480	239480	0	0	239480	0	0	1	0	0	1				129	155
F1N4J2	F1N4J2	1	1	1	1	1	1	1	0	1	0	0	1	0	0	1	0	0.2	0.2	0.2	518.41	4581	4581	1	1	0.0072464	-0.0010933		By MS/MS		0	0.2	0	584560	0	584560	0	0	592130	0	0	23	0	23				130	33
F1N5U1	F1N5U1	1	1	1	1	1	1	1	1	0	0	1	0	0	1	0	0	2	2	2	80,297	703	703	1	1	0.0071942	-0.0010933	By MS/MS			2	0	0	0	0	0	0	0	0	0	1	0	0	1				131	10
F1N5X8	F1N5X8	1	1	1	1	1	1	1	1	0	0	1	0	0	1	0	0	3.3	3.3	3.3	32,006	275	275	1	1	0.0071429	-0.0010933	By MS/MS			3.3	0	0	47229	47229	0	0	47229	0	0	1	0	0	1				132	65
F1N621	F1N621	1	1	1	1	1	1	1	0	1	0	0	1	0	0	1	0	2.1	2.1	2.1	49,381	421	421	1	1	0.0070922	-0.0010933		By MS/MS		0	2.1	0	30761	0	30761	0	0	31159	0	0	1	0	1				133	39
F1N7E8	F1N7E8	1	1	1	1	1	1	1	1	0	0	1	0	0	1	0	0	1.2	1.2	1.2	83,206	755	755	1	1	0.0070423	-0.0010933	By MS/MS			1.2	0	0	25227	25227	0	0	25227	0	0	1	0	0	1				134	88
F1N7F6	F1N7F6	1	1	1	1	1	1	1	0	0	1	0	0	1	0	0	1	0.9	0.9	0.9	110.32	999	999	1	1	0.006993	-0.0010933			By MS/MS	0	0	0.9	25966	0	0	25966	0	0	153630	0	0	1	1				135	59
F1N7L8	F1N7L8	1	1	1	1	1	1	1	0	0	1	0	0	1	0	0	1	1.7	1.7	1.7	62,994	535	535	1	1	0.0069444	-0.0010933			By MS/MS	0	0	1.7	454190	0	0	454190	0	0	2687300	0	0	1	1				136	92
F1N7Z6	F1N7Z6	1	1	1	1	1	1	1	0	0	1	0	0	1	0	0	1	0.6	0.6	0.6	165.65	1489	1489	1	1	0.0068966	-0.0010933			By MS/MS	0	0	0.6	20180	0	0	20180	0	0	119390	0	0	1	1				137	174
G1K177	G1K177	1	1	1	1	1	1	1	0	0	1	0	0	1	0	0	1	6.4	6.4	6.4	68.41	644	644	1	1	0	41,927			By MS/MS	0	0	6.4	7640.1	0	0	7640.1	0	0	45204	0	0	0	0				138	46
Q70IB5	Q70IB5;G3MWT2	1;1	1;1	1;1	2	1	1	1	0	1	0	0	1	0	0	1	0	3.5	3.5	3.5	29,439	259	259;266	1	1	0.0068493	-0.0010933		By MS/MS		0	3.5	0	48499	0	48499	0	0	49127	0	0	1	0	1				139	97
G3MWW7	G3MWW7	1	1	1	1	1	1	1	0	0	1	0	0	1	0	0	1	5.3	5.3	5.3	18,884	171	171	1	1	0.0068027	-0.0010933			By MS/MS	0	0	5.3	59609	0	0	59609	0	0	352680	0	0	1	1				140	17
G3MXN7	G3MXN7	1	1	1	1	1	1	1	1	0	0	1	0	0	1	0	0	8.9	8.9	8.9	17,264	158	158	1	1	0.0067568	-0.0010933	By MS/MS			8.9	0	0	0	0	0	0	0	0	0	1	0	0	1				141	69
G3MYU4	G3MYU4	1	1	1	1	1	1	1	0	0	1	0	0	1	0	0	1	1.5	1.5	1.5	73,151	618	618	1	1	0.0067114	-0.0010933			By MS/MS	0	0	1.5	61979	0	0	61979	0	0	366710	0	0	1	1				142	158
G3N0T2	G3N0T2	1	1	1	1	1	1	1	1	0	0	1	0	0	1	0	0	1.2	1.2	1.2	81,782	721	721	1	1	0.0066667	-0.0010933	By MS/MS			1.2	0	0	315270	315270	0	0	315270	0	0	1	0	0	1				143	160
G3N182	G3N182	1	1	1	1	1	1	1	1	0	0	1	0	0	1	0	0	13.4	13.4	13.4	36,191	344	344	1	1	0	0.42998	By MS/MS			13.4	0	0	19388	19388	0	0	19388	0	0	0	0	0	0				144	48
G3N1M8	G3N1M8	1	1	1	1	1	1	1	0	0	1	0	0	1	0	0	1	2.8	2.8	2.8	37,228	318	318	1	1	0.0066225	-0.0010933			By MS/MS	0	0	2.8	64280	0	0	64280	0	0	380320	0	0	1	1				145	96
G3N2P1	G3N2P1	1	1	1	1	1	1	1	1	0	0	1	0	0	1	0	0	2.2	2.2	2.2	48,043	417	417	1	2	0.0065789	-0.0010933	By MS/MS			2.2	0	0	967480	967480	0	0	483740	0	0	2	0	0	2				146	57
G3N369	G3N369	1	1	1	1	1	1	1	1	0	0	1	0	0	1	0	0	1.8	1.8	1.8	87.63	772	772	1	1	0.0065359	-0.0010933	By MS/MS			1.8	0	0	0	0	0	0	0	0	0	1	0	0	1				147	23
G3X6U0	G3X6U0	1	1	1	1	1	1	1	0	0	1	0	0	1	0	0	1	1.7	1.7	1.7	60,762	543	543	1	1	0.0064935	-0.0010933			By MS/MS	0	0	1.7	59111	0	0	59111	0	0	349740	0	0	1	1				148	166
G5E5L9	G5E5L9	1	1	1	1	1	1	1	0	0	1	0	0	1	0	0	1	0.8	0.8	0.8	121	1127	1127	1	1	0.0064516	-0.0010933			By MS/MS	0	0	0.8	18137	0	0	18137	0	0	107310	0	0	1	1				149	114
Q28141	Q28141;G5E5N3	1;1	1;1	1;1	2	1	1	1	1	0	0	1	0	0	1	0	0	0.7	0.7	0.7	141.94	1287	1287;1287	1	1	0.0064103	-0.0010933	By MS/MS			0.7	0	0	84388	84388	0	0	84388	0	0	1	0	0	1				150	63
Q2KJC6	Q2KJC6;G5E5U7	1;1	1;1	1;1	2	1	1	1	0	0	1	0	0	1	0	0	1	2.3	2.3	2.3	43.76	396	396;396	1	1	0.0063694	-0.0010933			By MS/MS	0	0	2.3	51377	0	0	51377	0	0	303980	0	0	1	1				151	148
G5E6N4	G5E6N4	1	1	1	1	1	1	1	0	0	1	0	0	1	0	0	1	2.4	2.4	2.4	41,839	381	381	1	1	0.0063291	-0.0010933			By MS/MS	0	0	2.4	62001	0	0	62001	0	0	366830	0	0	1	1				152	122
O02754	O02754	1	1	1	1	1	1	1	1	0	0	1	0	0	1	0	0	13.6	13.6	13.6	37,217	353	353	1	1	0	1.04	By MS/MS			13.6	0	0	12519	12519	0	0	12519	0	0	0	0	0	0				153	0
P02453	P02453	1	1	1	1	1	1	1	1	0	0	1	0	0	1	0	0	1.5	1.5	1.5	138.94	1463	1463	1	1	0	323.31	By MS/MS			1.5	0	0	12514000	12514000	0	0	12514000	0	0	32	0	0	32				154	146
P02465	P02465	1	1	1	1	1	1	1	1	0	0	1	0	0	1	0	0	1.6	1.6	1.6	129.06	1364	1364	1	1	0	10.74	By MS/MS			1.6	0	0	41561	41561	0	0	41561	0	0	1	0	0	1				155	51
P0C6R3	P0C6R3	1	1	1	1	1	1	1	1	0	0	1	0	0	1	0	0	1.6	1.6	1.6	61,777	550	550	1	1	0.0062893	-0.0010933	By MS/MS			1.6	0	0	69940	69940	0	0	69940	0	0	1	0	0	1				156	168
P12378	P12378	1	1	1	1	1	1	1	0	0	1	0	0	1	0	0	1	1.8	1.8	1.8	55,136	494	494	1	1	0.00625	-0.0010933			By MS/MS	0	0	1.8	18354	0	0	18354	0	0	108590	0	0	1	1				157	68
P19687	P19687	1	1	1	1	1	1	1	0	1	0	0	1	0	0	1	0	1.3	1.3	1.3	77,532	691	691	1	1	0.0062112	-0.0010933		By MS/MS		0	1.3	0	22824	0	22824	0	0	23120	0	0	1	0	1				158	31
P30205	P30205	1	1	1	1	1	1	1	0	1	1	0	1	1	0	1	1	0.6	0.6	0.6	154.2	1436	1436	1	3	0.0061728	-0.0010933		By MS/MS	By matching	0	0.6	0.6	125740	0	115180	10553	0	0	62441	0	1	0	1				159	14
P41361	P41361	1	1	1	1	1	1	1	1	0	0	1	0	0	1	0	0	3	3	3	52,347	465	465	1	1	0.006135	-0.0010933	By MS/MS			3	0	0	0	0	0	0	0	0	0	1	0	0	1				160	167
Q08E01	Q08E01	1	1	1	1	1	1	1	1	0	0	1	0	0	1	0	0	2.1	2.1	2.1	75,326	674	674	1	1	0.0060976	-0.0010933	By MS/MS			2.1	0	0	0	0	0	0	0	0	0	1	0	0	1				161	72
Q28120	Q28120;Q0P598	1;1	1;1	1;1	2	1	1	1	0	0	1	0	0	1	0	0	1	2.5	2.5	2.5	41,224	361	361;361	1	1	0.0060606	-0.0010933			By MS/MS	0	0	2.5	60793	0	0	60793	0	0	359690	0	0	2	2				162	126
Q0VC20	Q0VC20	1	1	1	1	1	1	1	0	0	1	0	0	1	0	0	1	1.9	1.9	1.9	50,882	463	463	1	1	0.0060241	-0.0010933			By MS/MS	0	0	1.9	32299	0	0	32299	0	0	191100	0	0	1	1				163	128
Q10569	Q10569	1	1	1	1	1	1	1	0	0	1	0	0	1	0	0	1	0.6	0.6	0.6	161.21	1444	1444	1	1	0.005988	-0.0010933			By MS/MS	0	0	0.6	25406	0	0	25406	0	0	150320	0	0	1	1				164	179
Q148L9	Q148L9	1	1	1	1	1	1	1	0	0	1	0	0	1	0	0	1	2.6	2.6	2.6	38,791	347	347	1	1	0.0059524	-0.0010933			By MS/MS	0	0	2.6	39762	0	0	39762	0	0	235250	0	0	1	1				165	4
Q17QL6	Q17QL6	1	1	1	1	1	1	1	0	1	0	0	1	0	0	1	0	13.6	13.6	13.6	30,971	360	360	1	1	0	44,645		By MS/MS		0	13.6	0	9455.9	0	9455.9	0	0	9578.3	0	0	0	0	0				166	130
Q17QN3	Q17QN3	1	1	1	1	1	1	1	1	0	0	1	0	0	1	0	0	20.4	20.4	20.4	24,622	240	240	1	1	0	40,923	By MS/MS			20.4	0	0	30950	30950	0	0	30950	0	0	0	0	0	0				167	47
Q24JZ4	Q24JZ4	1	1	1	1	1	1	1	1	0	0	1	0	0	1	0	0	1.5	1.5	1.5	64,054	583	583	1	1	0.0059172	-0.0010933	By MS/MS			1.5	0	0	20883	20883	0	0	20883	0	0	1	0	0	1				168	145
Q28107	Q28107	1	1	1	1	1	1	1	1	0	0	1	0	0	1	0	0	0.6	0.6	0.6	248.98	2211	2211	1	1	0.0058824	-0.0010933	By MS/MS			0.6	0	0	0	0	0	0	0	0	0	1	0	0	1				169	76
Q2KIL9	Q2KIL9	1	1	1	1	1	1	1	1	0	0	1	0	0	1	0	0	2.8	2.8	2.8	35,905	327	327	1	1	0.005848	-0.0010933	By MS/MS			2.8	0	0	28054	28054	0	0	28054	0	0	1	0	0	1				170	62
Q2KJ55	Q2KJ55	1	1	1	1	1	1	1	0	1	0	0	1	0	0	1	0	1.4	1.4	1.4	72,354	640	640	1	1	0.005814	-0.0010933		By MS/MS		0	1.4	0	69955	0	69955	0	0	70861	0	0	2	0	2				171	115
Q2KJ97	Q2KJ97	1	1	1	1	1	1	1	0	0	1	0	0	1	0	0	1	1.2	1.2	1.2	78,798	729	729	1	1	0.0057803	-0.0010933			By MS/MS	0	0	1.2	32992	0	0	32992	0	0	195200	0	0	1	1				172	28
Q3MIB9	Q3MIB9	1	1	1	1	1	1	1	0	0	1	0	0	1	0	0	1	3.6	3.6	3.6	27,578	252	252	1	1	0.0057471	-0.0010933			By MS/MS	0	0	3.6	92607	0	0	92607	0	0	547920	0	0	1	1				173	37
Q3SZ00	Q3SZ00	1	1	1	1	1	1	1	0	0	1	0	0	1	0	0	1	1.8	1.8	1.8	83,248	763	763	1	1	0.0057143	-0.0010933			By MS/MS	0	0	1.8	0	0	0	0	0	0	0	0	0	1	1				174	159
Q3SZJ5	Q3SZJ5	1	1	1	1	1	1	1	0	0	1	0	0	1	0	0	1	2.2	2.2	2.2	41,603	403	403	1	1	0.0056818	-0.0010933			By MS/MS	0	0	2.2	38365	0	0	38365	0	0	226990	0	0	1	1				175	30
Q3T028	Q3T028	1	1	1	1	1	1	1	0	0	1	0	0	1	0	0	1	3.3	3.3	3.3	31,826	272	272	1	1	0.0056497	-0.0010933			By MS/MS	0	0	3.3	36919	0	0	36919	0	0	218440	0	0	1	1				176	77
Q3T075	Q3T075	1	1	1	1	1	1	1	1	0	0	1	0	0	1	0	0	3.8	3.8	3.8	26,759	236	236	1	1	0.005618	-0.0010933	By MS/MS			3.8	0	0	56442	56442	0	0	56442	0	0	1	0	0	1				177	151
Q56K13	Q56K13	1	1	1	1	1	1	1	0	1	0	0	1	0	0	1	0	10.5	10.5	10.5	10,135	86	86	1	1	0.0055866	-0.0010933		By MS/MS		0	10.5	0	35102	0	35102	0	0	35556	0	0	1	0	1				178	169
Q7YRQ8	Q7YRQ8	1	1	1	1	1	1	1	0	0	1	0	0	1	0	0	1	3.8	3.8	3.8	26,675	234	234	1	1	0.0055556	-0.0010933			By MS/MS	0	0	3.8	13726	0	0	13726	0	0	81212	0	0	1	1				179	103
Q9GK68	Q9GK68	1	1	1	1	1	1	1	1	0	0	1	0	0	1	0	0	2	2	2	51,932	453	453	1	1	0.0055249	-0.0010933	By MS/MS			2	0	0	66153	66153	0	0	66153	0	0	1	0	0	1				180	124
									63
[truncated: 10 more columns]
