# Supplementary material for: Proteomic Analysis of Decellularized Extracellular Matrix: Achieving a Competent Biomaterial for Osteogenesis
Source: Biomed Res Int. 2022 Oct 11;2022:6884370. doi: 10.1155/2022/6884370 (PMC9578822; doi:10.1155/2022/6884370)
Supplement: Supplementary Materials — Supporting Information: an independent file is provided containing the following detailed information: Table S1: mass spectrometry-based protein identification and posttranslational modification data and Gene Ontology annotation for protein subsets identified in the different samples analyzed. Supp S1a: protein identifications by shotgun mass spectrometry. Supp S1b: identifications of proteins with the following posttranslational modifications: Cys-Cys, hydroxyproline, sulfation (Y), deamination (N), phosphorylation (ST), and oxidation (M). Supp T2c: Gene Ontology enriched categories for the whole set of identified proteins. Supp T2d: Gene Ontology enriched categories for the set of proteins with identified posttranslational modifications (PTMs). Supp T2e: set of all peptides identified by shotgun mass spectrometry. Supp T2f: set of peptides identified in proteins with posttranslational modifications (PTMs). Supp T2g: Gene Ontology annotation for the whole set of identified proteins. Supp T2h: Gene Ontology annotation for the set of proteins with posttranslational modifications (PTMs). Supp T2i: GO terms enriched for the set of proteins identified in the ECMt. Supp T2j: GO terms enriched for the set of proteins identified in the ECMb. Supp T2k: GO enriched for the set of proteins identified in the ECMp. Table S2: significance values for cell adhesion and proliferation assays. Significant p values for Student's t-test (α = 0.05): (a) cell adhesion after 4 h of incubation and (b) cell proliferation after 4, 8, 12, and 15 days. These measurements were performed using the Alamar Blue assay (BMMSCs MO-58) after continuous and stepwise digestion with trypsin, collagenase, and pepsin. Table S3: significance values for peptides and glycosaminoglycan quantification. Significant p values for Student's t-test (α = 0.05) in order to compare: (a–c) peptide quantification using BCA assay and (d, e) GAG quantification using DMMB assay, performed under continuous and stepwise diges [file 6884370.f1.zip › Suppl Table S2b. PROTEOMICS DATA.txt]

Supp table 2b. Proteome profile of PTMS from proteins extracted from ECMs
Protein IDs	Majority protein IDs	Peptide counts (all)	Peptide counts (razor+unique)	Peptide counts (unique)	Number of proteins	Peptides	Razor + unique peptides	Unique peptides	Peptides col eluido-_2-D,1_01_2589	Peptides ECMo eluido-_2-D,3_01_2591	Peptides ECMp eluido-_2-D,2_01_2590	Razor + unique peptides col eluido-_2-D,1_01_2589	Razor + unique peptides ECMo eluido-_2-D,3_01_2591	Razor + unique peptides ECMp eluido-_2-D,2_01_2590	Unique peptides col eluido-_2-D,1_01_2589	Unique peptides ECMo eluido-_2-D,3_01_2591	Unique peptides ECMp eluido-_2-D,2_01_2590	Sequence coverage %	Unique + razor sequence coverage %	Unique sequence coverage %	Mol. weight kDa	Sequence length	Sequence lengths	Q-value	Score	Identification type col eluido-_2-D,1_01_2589	Identification type ECMo eluido-_2-D,3_01_2591	Identification type ECMp eluido-_2-D,2_01_2590	Sequence coverage col eluido-_2-D,1_01_2589 %	Sequence coverage ECMo eluido-_2-D,3_01_2591 %	Sequence coverage ECMp eluido-_2-D,2_01_2590 %	Intensity	Intensity col eluido-_2-D,1_01_2589	Intensity ECMo eluido-_2-D,3_01_2591	Intensity ECMp eluido-_2-D,2_01_2590	LFQ intensity col eluido-_2-D,1_01_2589	LFQ intensity ECMo eluido-_2-D,3_01_2591	LFQ intensity ECMp eluido-_2-D,2_01_2590	MS/MS count col eluido-_2-D,1_01_2589	MS/MS count ECMo eluido-_2-D,3_01_2591	MS/MS count ECMp eluido-_2-D,2_01_2590	MS/MS count	Only identified by site	Reverse	Potential contaminant	id	Peptide IDs	Peptide is razor	Mod. peptide IDs
P19879	P19879;A5D9E8;G3N088	1;1;1	1;1;1	1;1;1	3	1	1	1	0	0	1	0	0	1	0	0	1	2.3	2.3	2.3	34,209	299	299;299;356	0	48,477			By MS/MS	0	0	2.3	530420	0	0	530420	0	0	3107000	0	0	4	4				0	105	True	163
A6QP44	A6QP44	1	1	1	1	1	1	1	1	0	0	1	0	0	1	0	0	1.1	1.1	1.1	116.95	1079	1079	0	9,236	By MS/MS			1.1	0	0	0	0	0	0	0	0	0	1	0	0	1				1	24	True	41
A7E303	A7E303	1	1	1	1	1	1	1	0	0	1	0	0	1	0	0	1	1.6	1.6	1.6	73,253	745	745	0	39,645			By MS/MS	0	0	1.6	0	0	0	0	0	0	0	0	0	6	6				2	95	True	153
P00978	P00978;F1MMK9;CON__P00978	1;1;1	1;1;1	1;1;1	3	1	1	1	0	0	1	0	0	1	0	0	1	2.3	2.3	2.3	39,234	352	352;352;352	0	13,612			By MS/MS	0	0	2.3	27261	0	0	27261	0	0	159680	0	0	3	3			+	4	10	True	17
Q05443	Q05443;CON__Q05443	1;1	1;1	1;1	2	1	1	1	0	0	1	0	0	1	0	0	1	2.3	2.3	2.3	38,756	342	342;342	0	91,872			By MS/MS	0	0	2.3	30124	0	0	30124	0	0	176450	0	0	5	5			+	5	11	True	18
G3N3E4	G3N3E4;E1BB91;G3N126	3;3;2	3;3;2	3;3;2	3	3	3	3	0	0	3	0	0	3	0	0	3	2.3	2.3	2.3	185.83	1703	1703;3170;1238	0	22,808			By MS/MS	0	0	2.3	68640	0	0	68640	0	0	402060	0	0	12	12				6	6;98;107	True;True;True	10;156;165
E1BF23	E1BF23	1	1	1	1	1	1	1	1	0	0	1	0	0	1	0	0	1	1	1	165.26	1467	1467	0	10,606	By MS/MS			1	0	0	185940	185940	0	0	185940	0	0	6	0	0	6				7	109	True	168
E1BI02	E1BI02;P13605	1;1	1;1	1;1	2	1	1	1	0	0	1	0	0	1	0	0	1	3.2	3.2	3.2	42,918	375	375;376	1	-2			By MS/MS	0	0	3.2	80264	0	0	80264	0	0	271830	0	0	6	6	+			8	116	True	176;177
E1BLA8	E1BLA8	1	1	1	1	1	1	1	1	0	0	1	0	0	1	0	0	2.7	2.7	2.7	45,536	405	405	1	-2	By MS/MS			2.7	0	0	2374500	2374500	0	0	2231600	0	0	34	0	0	34	+			9	108	True	166;167
F1MSR8	F1MSR8;P02459	2;2	1;1	1;1	2	2	1	1	1	1	1	1	0	0	1	0	0	3.1	3.1	3.1	134.43	1418	1418;1487	0	13,181	By MS/MS	By matching	By matching	3.1	1	1	290800	290800	0	0	290800	0	0	2	0	0	2				10	43;44	False;True	65;66;67
F1MW01	F1MW01	2	2	2	1	2	2	2	2	0	1	2	0	1	2	0	1	0.8	0.8	0.8	230.94	2109	2109	0	11,991	By MS/MS		By matching	0.8	0	0.7	31152	7182.6	0	23970	0	0	140400	1	0	0	1				11	1;5	True;True	1;9
Q9GKN8	Q9GKN8;F1MX63	1;1	1;1	1;1	2	1	1	1	0	0	1	0	0	1	0	0	1	2.6	2.6	2.6	43,682	381	381;381	0	31,383			By MS/MS	0	0	2.6	64405	0	0	64405	0	0	377260	0	0	11	11				12	101	True	159
F1N0K0	F1N0K0	2	2	1	1	2	2	1	1	1	0	1	1	0	1	0	0	1.3	1.3	0.7	182.35	1816	1816	0	13,406	By MS/MS	By MS/MS		0.7	0.7	0	80939	5055.3	75884	0	0	68814	0	0	5	0	5				13	104;113	True;True	162;173
F1N2Y2	F1N2Y2	3	3	3	1	3	3	3	2	1	0	2	1	0	2	1	0	2.9	2.9	2.9	145.04	1491	1491	0	39,479	By MS/MS	By MS/MS		1.7	1.1	0	211260	177650	33611	0	154980	0	0	10	1	0	11				14	30;94;111	True;True;True	50;152;170;171
F1N670	F1N670	1	1	1	1	1	1	1	1	0	0	1	0	0	1	0	0	4.3	4.3	4.3	63,848	585	585	0	91,013	By MS/MS			4.3	0	0	1977100	1977100	0	0	1977100	0	0	8	0	0	8				15	102	True	160
G3MX46	G3MX46	1	1	1	1	1	1	1	1	0	1	1	0	1	1	0	1	1.2	1.2	1.2	256.91	2508	2508	1	-2	By MS/MS		By MS/MS	1.2	0	1.2	23252000	22792000	0	460570	0	0	2697800	20	0	2	22	+			16	72	True	116;117;118
G3N2V3	G3N2V3	1	1	1	1	1	1	1	1	1	1	1	1	1	1	1	1	5	5	5	44,523	420	420	1	-2	By MS/MS	By MS/MS	By MS/MS	5	5	5	15052000	7052000	7635900	364380	0	0	2134400	7	23	1	31	+			17	71	True	113;114;115
P02453	P02453	42	42	41	1	42	42	41	21	35	9	21	35	9	21	34	8	49.1	49.1	49.1	138.94	1463	1463	0	323.31	By MS/MS	By MS/MS	By MS/MS	29.3	41.3	12.3	56234000	20285000	35193000	756810	17998000	19126000	5030100	282	388	38	708				18	2;3;4;13;14;15;17;19;21;22;25;28;29;33;34;35;40;41;42;43;45;50;51;52;54;62;63;64;67;68;76;79;83;84;87;88;96;97;117;119;121;122	True;True;True;True;True;True;True;True;True;True;True;True;True;True;True;True;True;True;True;True;True;True;True;True;True;True;True;True;True;True;True;True;True;True;True;True;True;True;True;True;True;True	2;3;4;5;6;7;8;20;21;22;23;24;28;31;36;37;38;39;42;43;44;47;48;49;54;55;56;61;62;63;64;65;66;68;69;77;78;79;80;81;82;83;84;85;89;100;101;102;103;104;107;108;109;123;124;125;126;127;130;131;137;138;141;142;154;155;178;180;181;182;183;184;187;188;189;190
P02465	P02465	50	50	50	1	50	50	50	25	39	14	25	39	14	25	39	14	53	53	53	129.06	1364	1364	0	323.31	By MS/MS	By MS/MS	By MS/MS	32.8	45.9	17	119860000	61629000	46108000	12121000	64861000	45336000	55590000	260	516	121	897				19	0;7;8;9;12;16;20;23;26;27;31;32;36;37;38;39;46;47;48;49;53;55;56;57;58;60;61;65;66;69;70;73;74;75;80;81;82;85;86;89;90;91;92;93;99;112;114;115;118;120	True;True;True;True;True;True;True;True;True;True;True;True;True;True;True;True;True;True;True;True;True;True;True;True;True;True;True;True;True;True;True;True;True;True;True;True;True;True;True;True;True;True;True;True;True;True;True;True;True;True	0;11;12;13;14;15;16;19;25;26;27;32;33;34;35;40;45;46;51;52;53;57;58;59;60;70;71;72;73;74;75;76;86;87;88;90;91;92;93;94;96;97;98;99;105;106;110;111;112;119;120;121;122;132;133;134;135;136;139;140;143;144;145;146;147;148;149;150;151;157;172;174;175;179;185;186
P04258	P04258;F1N2Y4;F1MXS8;CON__P04258	4;3;3;3	4;3;3;3	4;3;3;3	4	4	4	4	1	2	3	1	2	3	1	2	3	9.1	9.1	9.1	93,649	1049	1049;1047;1466;1466	0	228.91	By MS/MS	By MS/MS	By MS/MS	2.3	5.7	5.6	396310	0	61007	335300	0	0	1964100	5	4	52	61			+	20	18;59;77;78	True;True;True;True	29;30;95;128;129
[truncated: 15 more columns]
