# Supplementary material for: Proteomic Analysis of Decellularized Extracellular Matrix: Achieving a Competent Biomaterial for Osteogenesis
Source: Biomed Res Int. 2022 Oct 11;2022:6884370. doi: 10.1155/2022/6884370 (PMC9578822; doi:10.1155/2022/6884370)
Supplement: Supplementary Materials — Supporting Information: an independent file is provided containing the following detailed information: Table S1: mass spectrometry-based protein identification and posttranslational modification data and Gene Ontology annotation for protein subsets identified in the different samples analyzed. Supp S1a: protein identifications by shotgun mass spectrometry. Supp S1b: identifications of proteins with the following posttranslational modifications: Cys-Cys, hydroxyproline, sulfation (Y), deamination (N), phosphorylation (ST), and oxidation (M). Supp T2c: Gene Ontology enriched categories for the whole set of identified proteins. Supp T2d: Gene Ontology enriched categories for the set of proteins with identified posttranslational modifications (PTMs). Supp T2e: set of all peptides identified by shotgun mass spectrometry. Supp T2f: set of peptides identified in proteins with posttranslational modifications (PTMs). Supp T2g: Gene Ontology annotation for the whole set of identified proteins. Supp T2h: Gene Ontology annotation for the set of proteins with posttranslational modifications (PTMs). Supp T2i: GO terms enriched for the set of proteins identified in the ECMt. Supp T2j: GO terms enriched for the set of proteins identified in the ECMb. Supp T2k: GO enriched for the set of proteins identified in the ECMp. Table S2: significance values for cell adhesion and proliferation assays. Significant p values for Student's t-test (α = 0.05): (a) cell adhesion after 4 h of incubation and (b) cell proliferation after 4, 8, 12, and 15 days. These measurements were performed using the Alamar Blue assay (BMMSCs MO-58) after continuous and stepwise digestion with trypsin, collagenase, and pepsin. Table S3: significance values for peptides and glycosaminoglycan quantification. Significant p values for Student's t-test (α = 0.05) in order to compare: (a–c) peptide quantification using BCA assay and (d, e) GAG quantification using DMMB assay, performed under continuous and stepwise diges [file 6884370.f1.zip › Suppl Table S2e. PROTEOMICS DATA.txt]

Supp table 2e. Peptides identified in the Proteome profile of ECMs
Sequence	N-term cleavage window	C-term cleavage window	Amino acid before	First amino acid	Second amino acid	Second last amino acid	Last amino acid	Amino acid after	A Count	R Count	N Count	D Count	C Count	Q Count	E Count	G Count	H Count	I Count	L Count	K Count	M Count	F Count	P Count	S Count	T Count	W Count	Y Count	V Count	U Count	O Count	Length	Missed cleavages	Mass	Proteins	Leading razor protein	Start position	End position	Unique (Groups)	Unique (Proteins)	Charges	PEP	Score	Identification type col	Identification type ECM0	Identification type ECMp	Fraction Average	Fraction Std. Dev.	Fraction 1	Experiment col
AAAAPAGGGNDFDYPGAPVGPGGAVMPGGTHGPPPGYGCAAAGYLDSR	SRQQEKAKAAAAPAGG	AAGYLDSRLEPLYERV	K	A	A	S	R	L	10	1	1	3	1	0	0	13	1	0	1	0	1	1	8	1	1	0	3	2	0	0	48	0	44,249,968	O02754	O02754	93	140	yes	yes	4	0.0020917	26,653	By MS/MS			1	0	1	1
AAGGGGGGDPGDDDDAGGCGDAGPGGAVNGRGGGFAPGTEPFPGLFPR	KRGAFLKRAAGGGGGG	PFPGLFPRKPAPLPSP	R	A	A	P	R	K	6	2	1	6	1	0	1	19	0	0	1	0	0	3	6	0	1	0	0	1	0	0	48	1	42,698,431	E1BD25	E1BD25	634	681	yes	yes	5	0.0033504	1.80E-08	By MS/MS			1	0	1	1
AARAFLRAR	EAERHSNRAARAFLRA	ARAFLRARGWDGGLGG	R	A	A	A	R	G	4	3	0	0	0	0	0	0	0	0	1	0	0	1	0	0	0	0	0	0	0	0	9	2	10,306,148	F1MIU7	F1MIU7	104	112	yes	yes	2	0.022991	30,903			By MS/MS	1	0	1
AEKAEREFR	KSLKQLRKAEKAEREF	EKAEREFRKKFKFEGE	K	A	E	F	R	K	2	2	0	0	0	0	3	0	0	0	0	1	0	1	0	0	0	0	0	0	0	0	9	2	11,345,782	E1BLP0	E1BLP0	592	600	yes	yes	2	0.022991	25,137			By MS/MS	1	0	1
AGILWLYQR	TLWRDLHKAGILWLYQ	GILWLYQR________	K	A	G	Q	R	-	1	1	0	0	0	1	0	1	0	1	2	0	0	0	0	0	0	1	1	0	0	0	9	0	11,186,237	Q148L9	Q148L9	339	347	yes	yes	2	0.022991	26,602			By MS/MS	1	0	1
AKFGTEKCEQEEEK	IARARSLKAKFGTEKC	KCEQEEEKEDLERFVS	K	A	K	E	K	E	1	0	0	0	1	1	5	1	0	0	0	3	0	1	0	0	1	0	0	0	0	0	14	2	17,117,723	A4FUE5	A4FUE5	852	865	yes	yes	3	0.022991	46,301			By MS/MS	1	0	1
ALILVGLER	ELRQEGVRALILVGLE	LILVGLERVANLEQLM	R	A	L	E	R	V	1	1	0	0	0	0	1	1	0	1	3	0	0	0	0	0	0	0	0	1	0	0	9	0	98,261,752	E1BB91	E1BB91	1977	1985	yes	yes	1	0.022991	39,542			By MS/MS	1	0	1
ARRELELVR	ERALLQSRARRELELV	RRELELVREEAGRQPG	R	A	R	V	R	E	1	3	0	0	0	0	2	0	0	0	2	0	0	0	0	0	0	0	0	1	0	0	9	2	11,406,727	E1BKZ0	E1BKZ0	178	186	yes	yes	2	0.022991	18,661			By MS/MS	1	0	1
AVFVDLEPTVIDEVR	GAGKHVPRAVFVDLEP	PTVIDEVRTGTYRQLF	R	A	V	V	R	T	1	1	0	2	0	0	2	0	0	1	1	0	0	1	1	0	1	0	0	4	0	0	15	0	17,008,985	Q3ZCJ7;F1MNF8;P81947;F2Z4C1;Q2HJ86	Q3ZCJ7	65	79	yes	no	2	3.13E-118	104.79			By MS/MS	1	0	1
CCMETNLQCKSDEK	DNKVRFWKCCMETNLQ	LQCKSDEKETYHWRRW	K	C	C	E	K	E	0	0	1	1	3	1	2	0	0	0	1	2	1	0	0	1	1	0	0	0	0	0	14	1	18,017,103	F1MWB8	F1MWB8	1005	1018	yes	yes	3	0.022991	0.18201	By MS/MS			1	0	1	1
CDNCLALPITSTYK	MDFPVGNKCDNCLALP	LPITSTYKEFQESMDF	K	C	D	Y	K	E	1	0	1	1	2	0	0	0	0	1	2	1	0	0	1	1	2	0	1	0	0	0	14	0	16,547,695	F1N5U1	F1N5U1	665	678	yes	yes	3	0.022991	46,301	By MS/MS			1	0	1	1
CLELQPQDR	GLRDVALRCLELQPQD	LELQPQDRPPSRELLK	R	C	L	D	R	P	0	1	0	1	1	2	1	0	0	0	2	0	0	0	1	0	0	0	0	0	0	0	9	0	11,575,499	E1B847	E1B847	1485	1493	yes	yes	2	0.022991	17,386			By MS/MS	1	0	1
CLPHIVPNVLLAKR	SVMLMLGRCLPHIVPN	PNVLLAKREELIPLIL	R	C	L	K	R	E	1	1	1	0	1	0	0	0	1	1	3	1	0	0	2	0	0	0	0	2	0	0	14	1	16,289,549	E1BM42	E1BM42	522	535	yes	yes	2	0.022991	63,835			By MS/MS	1	0	1
CWSREPEQR	SLYELMLRCWSREPEQ	WSREPEQRPPFSQLHR	R	C	W	Q	R	P	0	2	0	0	1	1	2	0	0	0	0	0	0	0	1	1	0	1	0	0	0	0	9	1	12,465,513	F1MCM5;E1BBP4	F1MCM5	440	448	yes	no	2	0.022991	20.52		By MS/MS		1	0	1
DGVHRCEGR	QALELRLKDGVHRCEG	GVHRCEGRVEVKHQGE	K	D	G	G	R	V	0	2	0	1	1	0	1	2	1	0	0	0	0	0	0	0	0	0	0	1	0	0	9	1	10,844,832	P30205	P30205	32	40	yes	yes	1	0.022991	9,911		By MS/MS	By matching	1	0	3
DHAQFFRLGLNTLR	DQETRKAKDHAQFFRL	RLGLNTLRGYYNQSEA	K	D	H	L	R	G	1	2	1	1	0	1	0	1	1	0	3	0	0	2	0	0	1	0	0	0	0	0	14	1	16,868,954	F1MWX8	F1MWX8	93	106	yes	yes	3	0.022991	46,301		By MS/MS		1	0	1
DKDGTADTK	LWEGDSEKDKDGTADT	KDGTADTKPTQVDTSR	K	D	K	T	K	P	1	0	0	3	0	0	0	1	0	0	0	2	0	0	0	0	2	0	0	0	0	0	9	1	94,943,525	A0N0X6	A0N0X6	695	703	yes	yes	2	0.022991	4,137			By MS/MS	1	0	1
DRCPQAGPR	PLMHRPEKDRCPQAGP	RCPQAGPRERVRFNEK	K	D	R	P	R	E	1	2	0	1	1	1	0	1	0	0	0	0	0	0	2	0	0	0	0	0	0	0	9	1	10,554,931	G3MWW7	G3MWW7	98	106	yes	yes	2	0.022991	83,405			By MS/MS	1	0	1
DSPRTEAPR	ERPGVARKDSPRTEAP	SPRTEAPRRAEKEARP	K	D	S	P	R	R	1	2	0	1	0	0	1	0	0	0	0	0	0	0	2	1	1	0	0	0	0	0	9	1	10,275,047	F1N1H2;A6QQ70	F1N1H2	505	513	yes	no	2	0.022991	27,736	By MS/MS			1	0	1	1
DTLKDTSSR	SNLKDNLKDTLKDTSS	TLKDTSSRVIQSVTSY	K	D	T	S	R	V	0	1	0	2	0	0	0	0	0	0	1	1	0	0	0	2	2	0	0	0	0	0	9	1	1,021,504	Q27974;F1MPP5	Q27974	40	48	yes	no	2	0.022991	21.96			By MS/MS	1	0	1
DTTSFVLR	PKEVQLTRDTTSFVLR	DTTSFVLRGLEPGQEY	R	D	T	L	R	G	0	1	0	1	0	0	0	0	0	0	1	0	0	1	0	1	2	0	0	1	0	0	8	0	9,374,869	F1MRZ5;F1MRZ6	F1MRZ5	1034	1041	yes	no	2	3.96E-01	76,035			By MS/MS	1	0	2
EAALKEDWK	AEMGLKEREAALKEDW	AALKEDWKQKPSIPPT	R	E	A	W	K	Q	2	0	0	1	0	0	2	0	0	0	1	2	0	0	0	0	0	1	0	0	0	0	9	1	10,885,502	E1B9Q8	E1B9Q8	1033	1041	yes	yes	1	0.022991	16,203		By MS/MS		1	0	1
EAPVQPPGSGGGWDPASDQSSPSTPSPPLPPEAAHFLFGESALRK	EPCLEPWREAPVQPPG	FGESALRKRKSSLQGL	R	E	A	R	K	R	5	1	0	2	0	2	3	5	1	0	3	1	0	2	10	7	1	1	0	1	0	0	45	1	45,521,935	F1ML80	F1ML80	84	128	yes	yes	4	0.010299	6,251	By MS/MS			1	0	1	1
ECGRGFRHQSALIR	GEKPYVCRECGRGFRH	RHQSALIRHCSTHTRE	R	E	C	I	R	H	1	3	0	0	1	1	1	2	1	1	1	0	0	1	0	1	0	0	0	0	0	0	14	2	16,858,532	G3N369	G3N369	725	738	yes	yes	3	0.022991	46,301	By MS/MS			1	0	1	1
EELPGPGPDKER	VLRRDASKEELPGPGP	GPGPDKERDMDLGPRH	K	E	E	E	R	D	0	1	0	1	0	0	3	2	0	0	1	1	0	0	3	0	0	0	0	0	0	0	12	1	13,226,466	F1MW01	F1MW01	1530	1541	yes	yes	2	0.00040481	45,161	By MS/MS			1	0	3	3
EGGDDRLHSAEQDADDEAADDTDDTSSVTSSASSTTSSQSGSGTSR	QLPPFLLKEGGDDRLH	QSGSGTSRKKSIPLSI	K	E	G	S	R	K	5	2	0	9	0	2	3	4	1	0	1	0	0	0	0	12	6	0	0	1	0	0	46	1	45,918,534	F1N3I3	F1N3I3	465	510	yes	yes	5	0.016302	16,624	By MS/MS			1	0	1	1
ELETSHASCTRVHGHRDSSR				E	L	S	R		1	3	0	1	1	0	2	1	3	0	1	0	0	0	0	4	2	0	0	1	0	0	20	2	23,210,679		REV__F1MPI1			yes	yes	5	0.014933	31,438		By MS/MS	By matching	1	0	2
ELRSRNFQR	EENNKRMRELRSRNFQ	LRSRNFQRQTVDVLHK	R	E	L	Q	R	Q	0	3	1	0	0	1	1	0	0	0	1	0	0	1	0	1	0	0	0	0	0	0	9	2	12,046,425	E1BJU4	E1BJU4	377	385	yes	yes	2	0.022991	92,141			By MS/MS	1	0	1
EPFVFASVR	QVGPEKQKEPFVFASV	PFVFASVRILGAWLAE	K	E	P	V	R	I	1	1	0	0	0	0	1	0	0	0	0	0	0	2	1	1	0	0	0	2	0	0	9	0	10,505,498	Q2KJ97	Q2KJ97	389	397	yes	yes	2	0.022991	61,032			By MS/MS	1	0	1
EPPEVQSFR	RLRGQSCKEPPEVQSF	PPEVQSFREKMAFFTR	K	E	P	F	R	E	0	1	0	0	0	1	2	0	0	0	0	0	0	1	2	1	0	0	0	1	0	0	9	0	10,875,298	F1N3I6	F1N3I6	1038	1046	yes	yes	1	0.022991	12,356	By MS/MS			1	0	1	1
EQYPAALGR	FQGAMLAREQYPAALG	QYPAALGRPVSSSYPT	R	E	Q	G	R	P	2	1	0	0	0	1	1	1	0	0	1	0	0	0	1	0	0	0	1	0	0	0	9	0	10,035,087	Q3SZJ5	Q3SZJ5	122	130	yes	yes	2	0.022991	16,964			By MS/MS	1	0	1
ESLGEELFK	GVPVEIIKESLGEELF	SLGEELFKICYEEDEY	K	E	S	F	K	I	0	0	0	0	0	0	3	1	0	0	2	1	0	1	0	1	0	0	0	0	0	0	9	0	10,505,233	P19687	P19687	135	143	yes	yes	2	0.022991	4,137		By MS/MS		1	0	1
ESPLLVADR	LYCSPLGKESPLLVAD	SPLLVADRVLDGTPCG	K	E	S	D	R	V	1	1	0	1	0	0	1	0	0	0	2	0	0	0	1	1	0	0	0	1	0	0	9	0	99,853,966	G3N381;E1B6Z9	G3N381	129	137	yes	no	2	0.022991	15,151			By MS/MS	1	0	1
FGTCYVLTK	GRYMSIAKFGTCYVLT	GTCYVLTKSIPSAEVE	K	F	G	T	K	S	0	0	0	0	1	0	0	1	0	0	1	1	0	1	0	0	2	0	1	1	0	0	9	0	10,875,372	F1N4J2	F1N4J2	3427	3435	yes	yes	2	0.022991	31,289		By MS/MS		1	0	1
FHMDLFRMR	QWEQNLEKFHMDLFRM	HMDLFRMRCYLASMQG	K	F	H	M	R	C	0	2	0	1	0	0	0	0	1	0	1	0	2	2	0	0	0	0	0	0	0	0	9	1	12,516,005	F1MTH3	F1MTH3	669	677	yes	yes	2	0.022991	19,514			By MS/MS	1	0	1
FPQHLYSTR	DINEHRPRFPQHLYST	PQHLYSTRVLENAIVG	R	F	P	T	R	V	0	1	0	0	0	1	0	0	1	0	1	0	0	1	1	1	1	0	1	0	0	0	9	0	11,475,774	F1MPF3	F1MPF3	2132	2140	yes	yes	2	0.022991	10,468		By MS/MS		1	0	1
FRWSGRNNR	VLRLHLKRFRWSGRNN	RWSGRNNREKIGVHVG	R	F	R	N	R	E	0	3	2	0	0	0	0	1	0	0	0	0	0	1	0	1	0	1	0	0	0	0	9	2	1,191,601	E1BLZ0	E1BLZ0	574	582	yes	yes	2	0.022991	83,405		By MS/MS		1	0	1
FTISRRGAK	KDGKDPNRFTISRRGA	TISRRGAKMTEASSVE	R	F	T	A	K	M	1	2	0	0	0	0	0	1	0	1	0	1	0	1	0	1	1	0	0	0	0	0	9	2	10,345,985	Q3MIB9	Q3MIB9	88	96	yes	yes	2	0.022991	30,903			By MS/MS	1	0	1
FWLLKLLFR	KTFYYKSRFWLLKLLF	WLLKLLFRVFTAPFHK	R	F	W	F	R	V	0	1	0	0	0	0	0	0	0	0	4	1	0	2	0	0	0	1	0	0	0	0	9	1	1,234,759	F1MHL9	F1MHL9	372	380	yes	yes	2	0.022991	50,897	By MS/MS			1	0	1	1
FYGDKEKDK	KFQLTGGKFYGDKEKD	YGDKEKDKGLQSSEDA	K	F	Y	D	K	G	0	0	0	2	0	0	1	1	0	0	0	3	0	1	0	0	0	0	1	0	0	0	9	2	11,285,451	F1N621	F1N621	55	63	yes	yes	1	0.022991	4,137		By MS/MS		1	0	1
GEIQYMYFK	YDESGKSRGEIQYMYF	EIQYMYFKAEPYAADE	R	G	E	F	K	A	0	0	0	0	0	1	1	1	0	1	0	1	1	1	0	0	0	0	2	0	0	0	9	0	11,775,478	F1N1Z2	F1N1Z2	1027	1035	yes	yes	2	0.022991	18,035	By MS/MS		By matching	1	0	2	1
GEVTIHYNK	AKMIQEVKGEVTIHYN	EVTIHYNKLQADPKQG	K	G	E	N	K	L	0	0	1	0	0	0	1	1	1	1	0	1	0	0	0	0	1	0	1	1	0	0	9	0	10,595,349	F1MU52;Q2T9M1;F1N6J2	F1MU52	95	103	yes	no	2	0.022991	13,037			By MS/MS	1	0	1
GKAMVFAPR	IKRLLQPRGKAMVFAP	KAMVFAPRRGNTLNQF	R	G	K	P	R	R	2	1	0	0	0	0	0	1	0	0	0	1	1	1	1	0	0	0	0	1	0	0	9	1	97,553,241	A7YWN4	A7YWN4	255	263	yes	yes	2	0.022991	23,517	By MS/MS			1	0	1	1
GKSHKYDNK	GYKSQEKRGKSHKYDN	KSHKYDNKGNRFKKKS	R	G	K	N	K	G	0	0	1	1	0	0	0	1	1	0	0	3	0	0	0	1	0	0	1	0	0	0	9	2	10,755,411	E1BMC4	E1BMC4	1439	1447	yes	yes	2	0.022991	13,037			By MS/MS	1	0	1
GLALLQEGK	GRSVLTAKGLALLQEG	LALLQEGKAEITGNHD	K	G	L	G	K	A	1	0	0	0	0	1	1	2	0	0	3	1	0	0	0	0	0	0	0	0	0	0	9	0	92,753,893	E1BNR0	E1BNR0	2997	3005	yes	yes	2	0.022991	23,019			By MS/MS	1	0	1
GLCLRRFGEGLVGK	IRGQTEIKGLCLRRFG	FGEGLVGKVGFPRPLP	K	G	L	G	K	V	0	2	0	0	1	0	1	4	0	0	3	1	0	1	0	0	0	0	0	1	0	0	14	2	15,608,559	F1MMP9	F1MMP9	791	804	yes	yes	3	0.022991	46,301	By MS/MS			1	0	1	1
GPMPSGIQGPSPINMGAVGPQGSRQCPTISNSIQNRAPDFK	RGPVPGPRGPMPSGIQ	QNRAPDFKGQRVLSGH	R	G	P	F	K	G	2	2	3	1	1	4	0	6	0	4	0	1	2	1	7	5	1	0	0	1	0	0	41	2	42,480,627	G1K177	G1K177	473	513	yes	yes	3	1.47E-02	11,561			By MS/MS	1	0	1
GTVAAAAVAATASIAGAPTQYPPGRGTAPTPVGRATPPPGIMAPPPGMR	QVMTPQGRGTVAAAAV	MAPPPGMRPPMGPPIG	R	G	T	M	R	P	12	3	0	0	0	1	0	7	0	2	0	0	2	0	11	1	6	0	1	3	0	0	49	2	45,753,843	Q17QN3	Q17QN3	148	196	yes	yes	5	1.85E-02	54,059	By MS/MS			1	0	1	1
GVLLSAEAPGPAPSEEPGAAGEPPAAGAPITEGGCVAAAPRPDAER	________________	APRPDAERGSSQELVT	R	G	V	E	R	G	12	2	0	1	1	0	6	7	0	1	2	0	0	0	9	2	1	0	0	2	0	0	46	1	43,170,972	G3N182	G3N182	5	50	yes	yes	3	0.0085207	60,609	By MS/MS			1	0	1	1
GVLQAAPSR	GKGALPGKGVLQAAPS	VLQAAPSRALGTLRQD	K	G	V	S	R	A	2	1	0	0	0	1	0	1	0	0	1	0	0	0	1	1	0	0	0	1	0	0	9	0	89,750,321	E1B754	E1B754	1381	1389	yes	yes	2	0.022991	43,124		By MS/MS		1	0	2
GYKRLTSLK	LTCPYCDRGYKRLTSL	YKRLTSLKEHIKYRHE	R	G	Y	L	K	E	0	1	0	0	0	0	0	1	0	0	2	2	0	0	0	1	1	0	1	0	0	0	9	2	10,646,342	E1BE33	E1BE33	214	222	yes	yes	2	0.022991	4,137	By MS/MS			1	0	1	1
HGNRGEPGPAGAVGPAGAVGPR	GPVGPVGKHGNRGEPG	PAGAVGPRGPSGPQGI	K	H	G	P	R	G	4	2	1	0	0	0	1	7	1	0	0	0	0	0	4	0	0	0	0	2	0	0	22	1	19,800,038	P02465	P02465	973	994	yes	yes	4	4.17E-09	59,469	By MS/MS			1	0	1	1
HLFTPADKR	SDIKESRRHLFTPADK	LFTPADKRIPRIRIET	R	H	L	K	R	I	1	1	0	1	0	0	0	0	1	0	1	1	0	1	1	0	1	0	0	0	0	0	9	1	10,835,825	F1N1R4	F1N1R4	371	379	yes	yes	2	0.022991	12,356			By MS/MS	1	0	1
HLWQMQDHR	SLMFSLRRHLWQMQDH	LWQMQDHRPSPRDPST	R	H	L	H	R	P	0	1	0	1	0	2	0	0	2	0	1	0	1	0	0	0	0	1	0	0	0	0	9	0	12,495,775	E1BAN6	E1BAN6	200	208	yes	yes	2	0.022991	13,508			By MS/MS	1	0	1
HMLDYLWQR	GATPAERKHMLDYLWQ	MLDYLWQRNLRQFIYK	K	H	M	Q	R	N	0	1	0	1	0	1	0	0	1	0	2	0	1	0	0	0	0	1	1	0	0	0	9	0	12,606,074	A6QR40	A6QR40	249	257	yes	yes	2	0.022991	51,589		By MS/MS		1	0	1
HMRTHTGIR	HDAFDLKRHMRTHTGI	MRTHTGIRPFRCGACG	R	H	M	I	R	P	0	2	0	0	0	0	0	1	2	1	0	0	1	0	0	0	2	0	0	0	0	0	9	1	1,107,572	E1BCX0	E1BCX0	162	170	yes	yes	2	0.022991	17,909			By MS/MS	1	0	1
HQNVTLSIFTAR	EVADFLGRHQNVTLSI	TLSIFTARLYNFQEEG	R	H	Q	A	R	L	1	1	1	0	0	1	0	0	1	1	1	0	0	1	0	1	2	0	0	1	0	0	12	0	13,857,415	F1MP61	F1MP61	123	134	yes	yes	2	0.018456	35,944	By MS/MS			1	0	1	1
HQTKDSTPR	ACVDWATRHQTKDSTP	QTKDSTPRQNSLAKRT	R	H	Q	P	R	Q	0	1	0	1	0	1	0	0	1	0	0	1	0	0	1	1	2	0	0	0	0	0	9	1	10,685,312	G3N2P1	G3N2P1	51	59	yes	yes	2	0.022991	27,254	By MS/MS			1	0	2	2
HRYLAPGHR	CCNRNRPRHRYLAPGH	RYLAPGHRVPHARNPP	R	H	R	H	R	V	1	2	0	0	0	0	0	1	2	0	1	0	0	0	1	0	0	0	1	0	0	0	9	1	11,055,893	E1BMV0	E1BMV0	195	203	yes	yes	2	0.022991	34,808			By MS/MS	1	0	1
HSSVKESFR	LRPVLPEKHSSVKESF	SSVKESFRYANLTCSS	K	H	S	F	R	Y	0	1	0	0	0	0	1	0	1	0	0	1	0	1	0	3	0	0	0	1	0	0	9	1	10,755,411	F1N7F6	F1N7F6	520	528	yes	yes	2	0.022991	61,032			By MS/MS	1	0	1
HYLLKPVQR	RCANLALKHYLLKPVQ	YLLKPVQRIPQYRLLL	K	H	Y	Q	R	I	0	1	0	0	0	1	0	0	1	0	2	1	0	0	1	0	0	0	1	1	0	0	9	1	11,526,768	F1MQ30	F1MQ30	1014	1022	yes	yes	2	0.022991	4,137			By MS/MS	1	0	1
ILGDPEALR	IPAETLNRILGDPEAL	LGDPEALRDLLNNHIL	R	I	L	L	R	D	1	1	0	1	0	0	1	1	0	1	2	0	0	0	1	0	0	0	0	0	0	0	9	0	98,254,475	F1MBS3;P55906	F1MBS3	274	282	yes	no	2	0.011948	62,546			By MS/MS	1	0	1
ILLPGMVSR	VSVAQMTRILLPGMVS	LLPGMVSRGKGIIINI	R	I	L	S	R	G	0	1	0	0	0	0	0	1	0	1	2	0	1	0	1	1	0	0	0	1	0	0	9	0	98,457,902	Q2KIL9	Q2KIL9	185	193	yes	yes	2	0.022991	4,137	By MS/MS			1	0	1	1
IRTRAISAK	PFFVFGEKIRTRAISA	RTRAISAKGMTLVTPL	K	I	R	A	K	G	2	2	0	0	0	0	0	0	0	2	0	1	0	0	0	1	1	0	0	0	0	0	9	2	10,146,298	Q28141;G5E5N3	Q28141	1046	1054	yes	no	2	0.022991	28,367	By MS/MS			1	0	1	1
ISDPNFVKDLEEDLYELFKK	IKDLILPKISDPNFVK	DLYELFKKDPGFDRGQ	K	I	S	K	K	D	0	0	1	3	0	0	3	0	0	1	3	3	0	2	1	1	0	0	1	1	0	0	20	2	24,412,366	A6QLN5	A6QLN5	388	407	yes	yes	5	0.014933	78,038		By MS/MS		1	0	1
ISITICKKK	________________	SITICKKKRNVITRPF	-	I	S	K	K	R	0	0	0	0	1	0	0	0	0	3	0	3	0	0	0	1	1	0	0	0	0	0	9	2	1,089,658	F1N5X8	F1N5X8	1	9	yes	yes	2	0.022991	25,986	By MS/MS			1	0	1	1
ISQLGYSCFYIHAK	RVELLAKKISQLGYSC	SCFYIHAKMRQEHRNR	K	I	S	A	K	M	1	0	0	0	1	1	0	1	1	2	1	1	0	1	0	2	0	0	2	0	0	0	14	0	16,858,236	E1BDM8	E1BDM8	354	367	yes	yes	3	0.022991	46,301			By MS/MS	1	0	1
ITPLMAAFR	VDAADNRKITPLMAAF	TPLMAAFRKGHVKVVR	K	I	T	F	R	K	2	1	0	0	0	0	0	0	0	1	1	0	1	1	1	0	1	0	0	0	0	0	9	0	10,185,634	F1MI56	F1MI56	1397	1405	yes	yes	2	0.022991	16,294			By MS/MS	1	0	1
IVQNSHGYK	YIEACARRIVQNSHGY	VQNSHGYKIVTEKSTV	R	I	V	Y	K	I	0	0	1	0	0	1	0	1	1	1	0	1	0	0	0	1	0	0	1	1	0	0	9	0	10,445,352	P12378	P12378	116	124	yes	yes	2	0.022991	13,579			By MS/MS	1	0	1
KESFLLVSLHNRLR	PMPEVLSKKESFLLVS	VSLHNRLRSRVHPPAA	K	K	E	L	R	S	0	2	1	0	0	0	1	0	1	0	4	1	0	1	0	2	0	0	0	1	0	0	14	2	17,109,893	G3MXN7	G3MXN7	51	64	yes	yes	3	0.022991	46,301	By MS/MS			1	0	1	1
KLEDDAIAFEEFLR	RQLMKAEKKLEDDAIA	IAFEEFLRENDQRSVD	K	K	L	L	R	E	2	1	0	2	0	0	3	0	0	1	2	1	0	2	0	0	0	0	0	0	0	0	14	1	16,948,516	G3MWL5;F1MCS6;F1N2F7	G3MWL5	41	54	yes	no	2	0.022991	23,851		By MS/MS		1	0	1
KLVLEIIHR	EKPAQQLRKLVLEIIH	LVLEIIHRIPTNEHLR	R	K	L	H	R	I	0	1	0	0	0	0	1	0	1	2	2	1	0	0	0	0	0	0	0	1	0	0	9	1	11,197,128	E1BKJ5	E1BKJ5	91	99	yes	yes	2	0.022991	0.79236	By MS/MS			1	0	1	1
KQQGLEENHELFSK	EYKRTVERKQQGLEEN	ENHELFSKSFISMDVP	R	K	Q	S	K	S	0	0	1	0	0	2	3	1	1	0	2	2	0	1	0	1	0	0	0	0	0	0	14	1	16,858,373	Q08E01	Q08E01	572	585	yes	yes	3	0.022991	46,301	By MS/MS			1	0	1	1
KQTEEFSDK	KAYQSAMRKQTEEFSD	QTEEFSDKLLCLEKGL	R	K	Q	D	K	L	0	0	0	1	0	1	2	0	0	0	0	2	0	1	0	1	1	0	0	0	0	0	9	1	11,105,193	E1BES5	E1BES5	285	293	yes	yes	2	0.022991	57,813	By MS/MS			1	0	1	1
KRQIWALWK	ATALLLWKKRQIWALW	RQIWALWKHAAKRCPG	K	K	R	W	K	H	1	1	0	0	0	1	0	0	0	1	1	2	0	0	0	0	0	2	0	0	0	0	9	2	1,227,724	F1ML17	F1ML17	169	177	yes	yes	2	0.022991	51,589	By MS/MS			1	0	1	1
KSSSLVDIR	KQESMQGKKSSSLVDI	SSSLVDIREEESEGGS	K	K	S	I	R	E	0	1	0	1	0	0	0	0	0	1	1	1	0	0	0	3	0	0	0	1	0	0	9	1	10,035,662	F1MDF3	F1MDF3	467	475	yes	yes	2	0.022991	53,098	By MS/MS			1	0	1	1
KSWWGNYWEPFLAR	QITASSFKKSWWGNYW	YWEPFLARLNAQGRVN	K	K	S	A	R	L	1	1	1	0	0	0	1	1	0	0	1	1	0	1	1	1	0	3	1	0	0	0	14	1	18,388,893	Q28107	Q28107	2076	2089	yes	yes	2	0.022991	17,167	By MS/MS			1	0	1	1
KYMKNDVSK	LTFASVCKKYMKNDVS	YMKNDVSKKSGSDSPT	K	K	Y	S	K	K	0	0	1	1	0	0	0	0	0	0	0	3	1	0	0	1	0	0	1	1	0	0	9	2	11,115,696	Q3T028	Q3T028	211	219	yes	yes	1	0.022991	9,911			By MS/MS	1	0	1
LAEDPAEPR	PEEYVLTRLAEDPAEP	AEDPAEPRYRARERKA	R	L	A	P	R	Y	2	1	0	1	0	0	2	0	0	0	1	0	0	0	2	0	0	0	0	0	0	0	9	0	99,648,762	A2VDS4	A2VDS4	17	25	yes	yes	2	0.022991	4,137		By MS/MS		1	0	2
LANDVTYKR	EHSYRLLKLANDVTYK	ANDVTYKRLKKALISL	K	L	A	K	R	L	1	1	1	1	0	0	0	0	0	0	1	1	0	0	0	0	1	0	1	1	0	0	9	1	10,785,771	F1MHU8	F1MHU8	136	144	yes	yes	2	0.022991	13,579			By MS/MS	1	0	1
LEAELRKLK	GTEQYQSKLEAELRKL	EAELRKLKFSYRESLE	K	L	E	L	K	F	1	1	0	0	0	0	2	0	0	0	3	2	0	0	0	0	0	0	0	0	0	0	9	2	10,986,761	A0JNF4	A0JNF4	74	82	yes	yes	1	0.022991	4,137			By MS/MS	1	0	1
LEEIMKRTR	ERLERKKRLEEIMKRT	EEIMKRTRRTEASDKK	R	L	E	T	R	R	0	2	0	0	0	0	2	0	0	1	1	1	1	0	0	0	1	0	0	0	0	0	9	2	11,746,492	A6QNZ5	A6QNZ5	616	624	yes	yes	2	0.022991	4,137			By MS/MS	1	0	1
LGISQLHRR	SAEESPEKLGISQLHR	GISQLHRRKVISLNKQ	K	L	G	R	R	K	0	2	0	0	0	1	0	1	1	1	2	0	0	0	0	1	0	0	0	0	0	0	9	1	1,078,636	F1MDJ4	F1MDJ4	309	317	yes	yes	2	0.022991	47,345			By MS/MS	1	0	1
LGQHDQALK	GLGAAAARLGQHDQAL	GQHDQALKYYKEALAR	R	L	G	L	K	Y	1	0	0	1	0	2	0	1	1	0	2	1	0	0	0	0	0	0	0	0	0	0	9	0	10,085,352	E1BL14;F1MBT3	E1BL14	163	171	yes	no	2	0.022991	30,612		By MS/MS		1	0	1
LHRAQCAIK	YDVFSLLRLHRAQCAI	HRAQCAIKQTQVTVQK	R	L	H	I	K	Q	2	1	0	0	1	1	0	0	1	1	1	1	0	0	0	0	0	0	0	0	0	0	9	1	10,955,971	F1N3U6	F1N3U6	199	207	yes	yes	1	0.022991	84,187	By MS/MS		By matching	1	0	2	1
LIDTIYLPK	VTMVRVLRLIDTIYLP	IDTIYLPKFSISSDYN	R	L	I	P	K	F	0	0	0	1	0	0	0	0	0	2	2	1	0	0	1	0	1	0	1	0	0	0	9	0	10,746,325	A0A0A0MP88	A0A0A0MP88	295	303	yes	yes	2	0.022991	39,343		By MS/MS		1	0	1
LIQEEFASDGYLDR	PALQEATRLIQEEFAS	ASDGYLDRGLEALIMG	R	L	I	D	R	G	1	1	0	2	0	1	2	1	0	1	2	0	0	1	0	1	0	0	1	0	0	0	14	0	16,547,839	E1BNZ0;G3N205	E1BNZ0	864	877	yes	no	3	0.022991	22,996	By MS/MS			1	0	1	1
LLHELLWER	NRGRGSGRLLHELLWE	LHELLWERHRGGIAPG	R	L	L	E	R	H	0	1	0	0	0	0	2	0	1	0	4	0	0	0	0	0	0	1	0	0	0	0	9	0	12,076,713	F1N0C4	F1N0C4	51	59	yes	yes	2	0.022991	22,148		By MS/MS		1	0	1
LLRFPWSVK	DQTETAPRLLRFPWSV	LRFPWSVKLTSSRPPE	R	L	L	V	K	L	0	1	0	0	0	0	0	0	0	0	2	1	0	1	1	1	0	1	0	1	0	0	9	1	11,446,757	F1N7E8	F1N7E8	658	666	yes	yes	2	0.022991	18,661	By MS/MS			1	0	1	1
LMAYLAGAK	DNDRDDLKLMAYLAGA	MAYLAGAKYTGYLCRS	K	L	M	A	K	Y	3	0	0	0	0	0	0	1	0	0	2	1	1	0	0	0	0	0	1	0	0	0	9	0	93,651,027	F1N0E0;A0JNA8;G3MZP9	F1N0E0	554	562	yes	no	1	0.022991	23,517		By MS/MS		1	0	1
LNSMPLEER	EQKEISEKLNSMPLEE	NSMPLEERKAKAAAVS	K	L	N	E	R	K	0	1	1	0	0	0	2	0	0	0	2	0	1	0	1	1	0	0	0	0	0	0	9	0	10,875,332	F1N222;A5D7C2	F1N222	531	539	yes	no	2	0.022991	17.24		By MS/MS		1	0	1
LQEAPGSFR	HDYLPLVRLQEAPGSF	QEAPGSFRLDALFCAA	R	L	Q	F	R	L	1	1	0	0	0	1	1	1	0	0	1	0	0	1	1	1	0	0	0	0	0	0	9	0	10,035,087	E1BD12	E1BD12	1076	1084	yes	yes	2	0.022991	47,082			By MS/MS	1	0	1
LQIQTLQKK	IMQLTQQKLQIQTLQK	QIQTLQKKVVSLENAL	K	L	Q	K	K	V	0	0	0	0	0	3	0	0	0	1	2	2	0	0	0	0	1	0	0	0	0	0	9	1	10,986,761	F1N7L8	F1N7L8	289	297	yes	yes	1	0.022991	59,211			By MS/MS	1	0	1
LSECSSPPDYLSPPGSPCSPQPPPAAPGAGGGSGSAPGPSR	AVAAKCPRLSECSSPP	GSAPGPSRIADYLLLP	R	L	S	S	R	I	4	1	0	1	2	1	1	7	0	0	2	0	0	0	12	9	0	0	1	0	0	0	41	0	38,867,527	A6QLF4	A6QLF4	50	90	yes	yes	3	7.62E-03	68,118	By MS/MS			1	0	1	1
LSEDRERIR	VSEGQGSRLSEDRERI	SEDRERIREESDRRCR	R	L	S	I	R	E	0	3	0	1	0	0	2	0	0	1	1	0	0	0	0	1	0	0	0	0	0	0	9	2	11,726,262	E1BP31	E1BP31	26	34	yes	yes	2	0.022991	19,787			By MS/MS	1	0	1
LSVDIRKIR	KTVEKLFKLSVDIRKI	SVDIRKIRRLKGWVLL	K	L	S	I	R	R	0	2	0	1	0	0	0	0	0	2	1	1	0	0	0	1	0	0	0	1	0	0	9	2	10,986,873	F1MI83	F1MI83	55	63	yes	yes	1	0.022991	23,517	By MS/MS			1	0	1	1
LTKNFKNCR	VDKYMFHKLTKNFKNC	TKNFKNCRFEVASSLI	K	L	T	C	R	F	0	1	2	0	1	0	0	0	0	0	1	2	0	1	0	0	1	0	0	0	0	0	9	2	11,796,183	G3N1M8	G3N1M8	113	121	yes	yes	2	0.022991	13,037			By MS/MS	1	0	1
LVARQIYNK	TNGTEHVRLVARQIYN	VARQIYNKEEILHFDS	R	L	V	N	K	E	1	1	1	0	0	1	0	0	0	1	1	1	0	0	0	0	0	0	1	1	0	0	9	1	11,036,451	Q70IB5;G3MWT2	Q70IB5	56	64	yes	no	1	0.022991	4,137		By MS/MS		1	0	1
LVDYLDVGFDTTR	YIRTLIERLVDYLDVG	DVGFDTTRVAVIQFSD	R	L	V	T	R	V	0	1	0	3	0	0	0	1	0	0	2	0	0	1	0	0	2	0	1	2	0	0	13	0	1,512,746	E1BB91;G3N126;G3N3E4	E1BB91	1259	1271	yes	no	2	1.59E-30	83			By MS/MS	1	0	3
LWELCCRWLKPEMR	GPHEAFSKLWELCCRW	RWLKPEMRSKEQILEL	K	L	W	M	R	S	0	2	0	0	2	0	2	0	0	0	3	1	1	0	1	0	0	2	0	0	0	0	14	2	19,759,583	E1BN90	E1BN90	68	81	yes	yes	3	0.022991	46,301	By MS/MS			1	0	1	1
METQAQIEDSQDDVPKKLPSLVHFFPTSTDSDSTTLACSR	________________	STTLACSRSFSDEIPL	-	M	E	S	R	S	2	1	0	5	1	3	2	0	1	1	3	2	1	2	3	6	5	0	0	2	0	0	40	2	44,811,003	F1MRA0	F1MRA0	1	40	yes	yes	3	0.0087613	11,808	By MS/MS			1	0	1	1
MFSLLKRAK	PLSGVEEKMFSLLKRA	FSLLKRAKVQLIKIDQ	K	M	F	A	K	V	1	1	0	0	0	0	0	0	0	0	2	2	1	1	0	1	0	0	0	0	0	0	9	2	10,926,478	E1BKN0	E1BKN0	786	794	yes	yes	2	0.022991	4,137	By MS/MS			1	0	1	1
MGYTFPKYR	TEQSCEIRMGYTFPKY	GYTFPKYRGQGHMWQM	R	M	G	Y	R	G	0	1	0	0	0	0	0	1	0	0	0	1	1	1	1	0	1	0	2	0	0	0	9	1	11,615,641	G3MXQ9;E1B7T8	G3MXQ9	230	238	yes	no	2	0.022991	4,691		By MS/MS		1	0	1
MPRLLLANR	LKKEKNKKMPRLLLAN	PRLLLANRRLKIKKKQ	K	M	P	N	R	R	1	2	1	0	0	0	0	0	0	0	3	0	1	0	1	0	0	0	0	0	0	0	9	1	10,826,383	Q7YRQ8	Q7YRQ8	217	225	yes	yes	2	0.022991	4,137			By MS/MS	1	0	1
MSGGAPSGGGPGGSGRARTSSFAEPGGGGGGGGGGPGGSASGPGGSGGGK	________________	PGGSGGGKTSVGAMGG	-	M	S	G	K	T	4	2	0	0	0	0	1	26	0	0	0	1	1	1	5	8	1	0	0	0	0	0	50	2	39,147,335	A6QLB8	A6QLB8	1	50	yes	yes	4	5.34E-03	51,286		By MS/MS		1	0	1
NDDETCEQR	CCYDGAHRNDDETCEQ	DDETCEQRAARIQAGP	R	N	D	Q	R	A	0	1	1	2	1	1	2	0	0	0	0	0	0	0	0	0	1	0	0	0	0	0	9	0	11,654,306	F1MY85	F1MY85	706	714	yes	yes	1	0.022991	61,032	By MS/MS			1	0	1	1
NFERNKAIK	IRTLLQARNFERNKAI	FERNKAIKVIIAVVVV	R	N	F	I	K	V	1	1	2	0	0	0	1	0	0	1	0	2	0	1	0	0	0	0	0	0	0	0	9	2	11,186,196	Q5MD62;A0JNA6	Q5MD62	255	263	yes	no	2	0.022991	4,137	By MS/MS		By matching	1	0	2	1
NGAGSGPRR	________________	GAGSGPRRRARVSRLV	M	N	G	R	R	R	1	2	1	0	0	0	0	3	0	0	0	0	0	0	1	1	0	0	0	0	0	0	9	1	87,044,201	F1MX94	F1MX94	2	10	yes	yes	1	0.022991	17,986			By MS/MS	1	0	1
NLMVHQRIHTGEK	RKVLTSSRNLMVHQRI	QRIHTGEKPYKCSECG	R	N	L	E	K	P	0	1	1	0	0	1	1	1	2	1	1	1	1	0	0	0	1	0	0	1	0	0	13	1	15,618,147	E1BKY0	E1BKY0	889	901	yes	yes	2	0.0026013	43,512	By MS/MS			1	0	4	4
NQQLEAIAKEHYER	EKQKRIKRNQQLEAIA	IAKEHYERVLLRKKGL	R	N	Q	E	R	V	2	1	1	0	0	2	3	0	1	1	1	1	0	0	0	0	0	0	1	0	0	0	14	1	17,278,591	E1BBW2	E1BBW2	730	743	yes	yes	3	0.022991	46,301	By MS/MS			1	0	1	1
NRESIQEPR	QELSGNMKNRESIQEP	RESIQEPRFDYYNHEV	K	N	R	P	R	F	0	2	1	0	0	1	2	0	0	1	0	0	0	0	1	1	0	0	0	0	0	0	9	1	11,275,683	E1BG78	E1BG78	610	618	yes	yes	2	0.022991	17,386	By MS/MS			1	0	1	1
PALSPKEGK	TGSSGEVKPALSPKEG	ALSPKEGKTLDTLPKT	K	P	A	G	K	T	1	0	0	0	0	0	1	1	0	0	1	2	0	0	2	1	0	0	0	0	0	0	9	1	92,552,328	F1MPW8	F1MPW8	2802	2810	yes	yes	1	0.022991	15,439			By MS/MS	1	0	1
PAVAHLAER	EKKKYQPKPAVAHLAE	AVAHLAEREQVIKLGT	K	P	A	E	R	E	3	1	0	0	0	0	1	0	1	0	1	0	0	0	1	0	0	0	0	1	0	0	9	0	96,252,976	E1BNH3	E1BNH3	515	523	yes	yes	2	0.022991	31,289			By MS/MS	1	0	1
PFLFLLKKK	RLKASVCKPFLFLLKK	FLFLLKKKTPSPVKLA	K	P	F	K	K	T	0	0	0	0	0	0	0	0	0	0	3	3	0	2	1	0	0	0	0	0	0	0	9	2	11,327,372	F1MLY7	F1MLY7	749	757	yes	yes	1	0.022991	0	By MS/MS	By MS/MS		1	0	2	1
PGAGAPLSR	QLQEEEERPGAGAPLS	GAGAPLSRAGPHRAAS	R	P	G	S	R	A	2	1	0	0	0	0	0	2	0	0	1	0	0	0	2	1	0	0	0	0	0	0	9	0	82,445,045	G5E5L9	G5E5L9	191	199	yes	yes	1	0.022991	16,154			By MS/MS	1	0	1
PGDWKPQSR	EDKASRDKPGDWKPQS	GDWKPQSRKRTQTLPN	K	P	G	S	R	K	0	1	0	1	0	1	0	1	0	0	0	1	0	0	2	1	0	1	0	0	0	0	9	1	10,695,305	Q2KJ55	Q2KJ55	424	432	yes	yes	1	0.022991	15,582		By MS/MS		1	0	1
PGGEASDPR	AGPAQDPRPGGEASDP	GGEASDPRVGAAREEA	R	P	G	P	R	V	1	1	0	1	0	0	1	2	0	0	0	0	0	0	2	1	0	0	0	0	0	0	9	0	88,439,881	E1B8C2	E1B8C2	110	118	yes	yes	1	0.022991	10,468			By MS/MS	1	0	1
PGKNCTSHR	GSRSGSKKPGKNCTSH	GKNCTSHRNRNQVSKA	K	P	G	H	R	N	0	1	1	0	1	0	0	1	1	0	0	1	0	0	1	1	1	0	0	0	0	0	9	1	10,554,931	E1BEI7	E1BEI7	357	365	yes	yes	2	0.022991	24,923			By MS/MS	1	0	1
PGRFEDFYK	RFSLDRQKPGRFEDFY	GRFEDFYKLVVHTHHI	K	P	G	Y	K	L	0	1	0	1	0	0	1	1	0	0	0	1	0	2	1	0	0	0	1	0	0	0	9	1	11,575,506	F1N1E2	F1N1E2	39	47	yes	yes	2	0.022991	4,137			By MS/MS	1	0	1
PHCFNCGSEEHQMK	AKRPNRPKPHCFNCGS	GSEEHQMKDCPMPRNA	K	P	H	M	K	D	0	0	1	0	2	1	2	1	2	0	0	1	1	1	1	1	0	0	0	0	0	0	14	0	17,596,865	F1MM78	F1MM78	229	242	yes	yes	3	0.022991	1,416	By MS/MS			1	0	1	1
PHPPSSGLPPCPR	RWLWKKVKPHPPSSGL	SGLPPCPRLGHSFSLY	K	P	H	P	R	L	0	1	0	0	1	0	0	1	1	0	1	0	0	0	6	2	0	0	0	0	0	0	13	0	13,976,874	E1BEJ7	E1BEJ7	115	127	yes	yes	2	0.0010317	47,823		By MS/MS		1	0	1
PLLDDFLFR	MLGSSLIKPLLDDFLF	LLDDFLFRASRIILNS	K	P	L	F	R	A	0	1	0	2	0	0	0	0	0	0	3	0	0	2	1	0	0	0	0	0	0	0	9	0	11,346,073	E1BND0	E1BND0	1591	1599	yes	yes	2	0.022991	4,137	By MS/MS			1	0	1	1
PQRHPEPGR	GRDPAAARPQRHPEPG	QRHPEPGRRGRGSGSL	R	P	Q	G	R	R	0	2	0	0	0	1	1	1	1	0	0	0	0	0	3	0	0	0	0	0	0	0	9	1	10,725,526	G5E6N4	G5E6N4	44	52	yes	yes	1	0.022991	76,903			By MS/MS	1	0	1
PSNEYFAEK	NPCELHCRPSNEYFAE	SNEYFAEKLRDAVVDG	R	P	S	E	K	L	1	0	1	0	0	0	2	0	0	0	0	1	0	1	1	1	0	0	1	0	0	0	9	0	10,834,873	F1N2M2	F1N2M2	624	632	yes	yes	1	0.022991	14,535	By MS/MS			1	0	1	1
PSQDPDQKR	HSLHPKRKPSQDPDQK	SQDPDQKRGLSACPMG	K	P	S	K	R	G	0	1	0	2	0	2	0	0	0	0	0	1	0	0	2	1	0	0	0	0	0	0	9	1	10,695,152	Q9GK68	Q9GK68	288	296	yes	yes	1	0.022991	13,579	By MS/MS			1	0	1	1
PTAQYQWVR	SCQSPRSKPTAQYQWV	TAQYQWVRSPPSSQVF	K	P	T	V	R	S	1	1	0	0	0	2	0	0	0	0	0	0	0	0	1	0	1	1	1	1	0	0	9	0	11,475,774	F1MT78	F1MT78	187	195	yes	yes	2	0.022991	14,157		By MS/MS		1	0	1
QHIMQRIQR	SPGSFAARQHIMQRIQ	HIMQRIQRLQADWVLE	R	Q	H	Q	R	L	0	2	0	0	0	3	0	0	1	2	0	0	1	0	0	0	0	0	0	0	0	0	9	1	1,208,656	Q28120;Q0P598	Q28120	89	97	yes	no	2	0.022991	22,131			By MS/MS	1	0	1
QKLKEHLLK	SAFREQRRQKLKEHLL	KLKEHLLKRKTSFACK	R	Q	K	L	K	R	0	0	0	0	0	1	1	0	1	0	3	3	0	0	0	0	0	0	0	0	0	0	9	2	11,357,077	F1MBA0;A5D7U0	F1MBA0	28	36	yes	no	2	0.022991	37,464	By MS/MS			1	0	1	1
QKYPEQPGR	ATLEAYTKQKYPEQPG	KYPEQPGRFAKLLLRL	K	Q	K	G	R	F	0	1	0	0	0	2	1	1	0	0	0	1	0	0	2	0	0	0	1	0	0	0	9	1	11,015,567	Q0VC20	Q0VC20	407	415	yes	yes	2	0.022991	14,157			By MS/MS	1	0	1
QMVHEGNQR	TDTASKLKQMVHEGNQ	MVHEGNQRWDNLQKRV	K	Q	M	Q	R	W	0	1	1	0	0	2	1	1	1	0	0	0	1	0	0	0	0	0	0	1	0	0	9	0	10,975,036	F1MF78	F1MF78	6170	6178	yes	yes	2	0.022991	27,525			By MS/MS	1	0	1
QPTPQPPVGCGKTSGGSGGVFYSGGGGGSGSCGSSGGGGGGGCSGGSIK	________________	GCSGGSIKYSGGGGSS	K	Q	P	I	K	Y	0	0	0	0	3	2	0	22	0	1	0	2	0	1	4	9	2	0	1	2	0	0	49	1	42,598,291	Q17QL6	Q17QL6	7	55	yes	yes	5	7.87E-03	0.73544		By MS/MS		1	0	1
QQALERLKR	EKKSKKGRQQALERLK	QALERLKRAKAGEKYK	R	Q	Q	K	R	A	1	2	0	0	0	2	1	0	0	0	2	1	0	0	0	0	0	0	0	0	0	0	9	2	11,406,727	E1BJF4	E1BJF4	38	46	yes	yes	2	0.022991	23,517			By MS/MS	1	0	1
QRYQDLQEK	RSQLAQCKQRYQDLQE	RYQDLQEKLLISEATV	K	Q	R	E	K	L	0	1	0	1	0	3	1	0	0	0	1	1	0	0	0	0	0	0	1	0	0	0	9	1	12,065,993	F1MQ84	F1MQ84	1226	1234	yes	yes	3	0.022991	43,364			By MS/MS	1	0	1
QVNCQMRVK	SSKRKTGRQVNCQMRV	VNCQMRVKKTMPFFLE	R	Q	V	V	K	K	0	1	1	0	1	2	0	0	0	0	0	1	1	0	0	0	0	0	0	2	0	0	9	1	11,615,747	A6QLE1	A6QLE1	100	108	yes	yes	2	0.022991	14,776			By MS/MS	1	0	1
RAQKPSHMR	ASEDPKKKRAQKPSHM	AQKPSHMRRNIRKLLR	K	R	A	M	R	R	1	2	0	0	0	1	0	0	1	0	0	1	1	0	1	1	0	0	0	0	0	0	9	2	11,095,876	E1BEK4	E1BEK4	103	111	yes	yes	2	0.022991	18,539			By MS/MS	1	0	1
RARLNESHR	IKSMAASRRARLNESH	ARLNESHRLHQFFRDM	R	R	A	H	R	L	1	3	1	0	0	0	1	0	1	0	1	0	0	0	0	1	0	0	0	0	0	0	9	2	11,376,115	E1BFB0	E1BFB0	1757	1765	yes	yes	2	0.022991	13,579			By MS/MS	1	0	1
RENPEYFPR	VPGFFLVRRENPEYFP	ENPEYFPRGSSYWDRC	R	R	E	P	R	G	0	2	1	0	0	0	2	0	0	0	0	0	0	1	2	0	0	0	1	0	0	0	9	1	12,065,782	E1BIT2	E1BIT2	235	243	yes	yes	2	0.022991	97,809			By MS/MS	1	0	1
RLCLLHHFR	AGRPPRARRLCLLHHF	LCLLHHFRKQRALWRL	R	R	L	F	R	K	0	2	0	0	1	0	0	0	2	0	3	0	0	1	0	0	0	0	0	0	0	0	9	1	12,506,819	F1MJ64	F1MJ64	12	20	yes	yes	2	0.022991	13,508		By MS/MS		1	0	1
RNLRNQSYR	TGPGGMLKRNLRNQSY	NLRNQSYRAAMKGLGT	K	R	N	Y	R	A	0	3	2	0	0	1	0	0	0	0	1	0	0	0	0	1	0	0	1	0	0	0	9	2	12,056,378	F1MFR9	F1MFR9	146	154	yes	yes	2	0.022991	18,035		By MS/MS		1	0	1
RPERPWPER	PRPPPSRRRPERPWPE	PERPWPERPEEKAEPP	R	R	P	E	R	P	0	3	0	0	0	0	2	0	0	0	0	0	0	0	3	0	0	1	0	0	0	0	9	2	12,216,367	F1N1C7	F1N1C7	281	289	yes	yes	2	0.022991	14,157		By MS/MS		1	0	1
RSEPYYSSSCLPSR	YRSCSPPRRSEPYYSS	SSSCLPSRCSLGSYNY	R	R	S	S	R	C	0	2	0	0	1	0	1	0	0	0	1	0	0	0	2	5	0	0	2	0	0	0	14	1	16,877,624	E1BLN6	E1BLN6	251	264	yes	yes	2	0.022991	8,745		By MS/MS		1	0	1
RTVRVVASK	YLDCLDSRRTVRVVAS	TVRVVASKQGSTVTLG	R	R	T	S	K	Q	1	2	0	0	0	0	0	0	0	0	0	1	0	0	0	1	1	0	0	3	0	0	9	2	10,146,298	A6QPM5	A6QPM5	98	106	yes	yes	2	0.022991	28,367	By MS/MS			1	0	1	1
RVFQKFLQR	RRAGYAYRRVFQKFLQ	VFQKFLQRYAILTKAT	R	R	V	Q	R	Y	0	2	0	0	0	2	0	0	0	0	1	1	0	2	0	0	0	0	0	1	0	0	9	2	12,207,142	F1MQ65	F1MQ65	627	635	yes	yes	1	0.022991	23,517		By MS/MS		1	0	1
RYQRALMFR	QNRRAKWRRYQRALMF	YQRALMFRNVHPAALG	R	R	Y	F	R	N	1	3	0	0	0	1	0	0	0	0	1	0	1	1	0	0	0	0	1	0	0	0	9	2	12,396,659	F1N0Z3	F1N0Z3	182	190	yes	yes	3	0.022991	11,151		By MS/MS		1	0	1
SEIEHHRNK	IQTALRHKSEIEHHRN	EIEHHRNKIRLRAKRR	K	S	E	N	K	I	0	1	1	0	0	0	2	0	2	1	0	1	0	0	0	1	0	0	0	0	0	0	9	1	11,485,687	F1MKV4;F1MY14	F1MKV4	1465	1473	yes	no	2	0.022991	83,405			By MS/MS	1	0	1
SETSWESPK	SVPPSQTKSETSWESP	ETSWESPKQIKKKKKA	K	S	E	P	K	Q	0	0	0	0	0	0	2	0	0	0	0	1	0	0	1	3	1	1	0	0	0	0	9	0	10,494,666	Q24JZ4	Q24JZ4	563	571	yes	yes	2	0.022991	4,137	By MS/MS			1	0	1	1
SGDRGETGPAGPAGPIGPVGAR	GPVGPAGKSGDRGETG	PIGPVGARGPAGPQGP	K	S	G	A	R	G	3	2	0	1	0	0	1	7	0	1	0	0	0	0	4	1	1	0	0	1	0	0	22	1	19,749,872	P02453	P02453	1062	1083	yes	yes	3	0	212.26	By MS/MS			1	0	1	1
SLDLDSIIAEVK	VLSMDNNRSLDLDSII	DSIIAEVKAQYEEIAN	R	S	L	V	K	A	1	0	0	2	0	0	1	0	0	2	2	1	0	0	0	2	0	0	0	1	0	0	12	0	13,017,078	Q29S21;Q08D91;M0QVZ6;A5D7M6;Q5XQN5;G3MXL3	Q29S21	255	266	yes	no	2	0.0015377	53,683			By MS/MS	1	0	2
SLVKAGLCR	YAARWVAKSLVKAGLC	LVKAGLCRRVLVQVSY	K	S	L	C	R	R	1	1	0	0	1	0	0	1	0	0	2	1	0	0	0	1	0	0	0	1	0	0	9	1	10,025,644	Q2KJC6;G5E5U7	Q2KJC6	305	313	yes	no	2	0.022991	17.24			By MS/MS	1	0	1
SPIALGYTR	WEQSFCWKSPIALGYT	PIALGYTRGHFSALVA	K	S	P	T	R	G	1	1	0	0	0	0	0	1	0	1	1	0	0	0	1	1	1	0	1	0	0	0	9	0	97,653,418	A6QP16	A6QP16	575	583	yes	yes	1	0.022991	21.96			By MS/MS	1	0	1
SPLVFVLCR	ATGARAIRSPLVFVLC	PLVFVLCRASSLAARG	R	S	P	C	R	A	0	1	0	0	1	0	0	0	0	0	2	0	0	1	1	1	0	0	0	2	0	0	9	0	10,896,005	E1B7W2	E1B7W2	94	102	yes	yes	2	0.022991	30,067	By MS/MS			1	0	1	1
SSLMTGGAK	GAEPDLIRSSLMTGGA	SLMTGGAKRGAPNPWL	R	S	S	A	K	R	1	0	0	0	0	0	0	2	0	0	1	1	1	0	0	2	1	0	0	0	0	0	9	0	85,042,185	Q3T075	Q3T075	109	117	yes	yes	1	0.022991	18,782	By MS/MS			1	0	1	1
SVAPSPFSR	RIPAETPKSVAPSPFS	VAPSPFSRFTVSPAPA	K	S	V	S	R	F	1	1	0	0	0	0	0	0	0	0	0	0	0	1	2	3	0	0	0	1	0	0	9	0	94,648,723	F1MIB7	F1MIB7	1318	1326	yes	yes	1	0.022991	17,986			By MS/MS	1	0	1
SYGPLDMYR	________________	YGPLDMYRNPGGSGPP	M	S	Y	Y	R	N	0	1	0	1	0	0	0	1	0	0	1	0	1	0	1	1	0	0	2	0	0	0	9	0	11,004,961	A7MAZ2	A7MAZ2	2	10	yes	yes	2	0.022991	13,579		By MS/MS		1	0	1
TAEVSSSKR	IHWTNVVKTAEVSSSK	AEVSSSKRECHSMDTE	K	T	A	K	R	E	1	1	0	0	0	0	1	0	0	0	0	1	0	0	0	3	1	0	0	1	0	0	9	1	96,349,852	E1BIF6	E1BIF6	3094	3102	yes	yes	1	0.022991	20.52			By MS/MS	1	0	1
TGILTAVKK	SEFNLDHRTGILTAVK	GILTAVKKLDREKQEK	R	T	G	K	K	L	1	0	0	0	0	0	0	1	0	1	1	2	0	0	0	0	2	0	0	1	0	0	9	1	92,959,097	F1N446	F1N446	519	527	yes	yes	2	0.022991	28,367	By MS/MS			1	0	1	1
THIDVIHYR	SNVKSVYKTHIDVIHY	HIDVIHYRKTDSKRLH	K	T	H	Y	R	K	0	1	0	1	0	0	0	0	2	2	0	0	0	0	0	0	1	0	1	1	0	0	9	0	1,152,604	E1BLY2	E1BLY2	116	124	yes	yes	2	0.022991	28,174			By MS/MS	1	0	1
TKDSTFLADLQQALAMMEDLIKSCELAMDLAAVTGCPDDIGK	SAKNGPKRTKDSTFLA	GCPDDIGKFGKLLMHG	R	T	K	G	K	F	6	0	0	6	2	2	2	2	0	2	6	3	3	1	1	2	3	0	0	1	0	0	42	2	4,585,177	F1MQ44	F1MQ44	797	838	yes	yes	3	1.26E-02	67,584	By MS/MS			1	0	1	1
TLLLFILVK	NMSEEQSKTLLLFILV	LLLFILVKKSQIDPK_	K	T	L	V	K	K	0	0	0	0	0	0	0	0	0	1	4	1	0	1	0	0	1	0	0	1	0	0	9	0	10,587,104	G3MYU4	G3MYU4	603	611	yes	yes	1	0.022991	0			By MS/MS	1	0	1
TLRCSGYICRSFTR	LSRFTASRTLRCSGYI	YICRSFTRSSALLTRT	R	T	L	T	R	S	0	3	0	0	2	0	0	1	0	1	1	0	0	1	0	2	2	0	1	0	0	0	14	2	17,758,559	Q3SZ00	Q3SZ00	18	31	yes	yes	3	0.022991	22,996			By MS/MS	1	0	1
TSSLAQHER	DCGKAFRKTSSLAQHE	SSLAQHERVHTGEKPF	K	T	S	E	R	V	1	1	0	0	0	1	1	0	1	0	1	0	0	0	0	2	1	0	0	0	0	0	9	0	10,275,047	G3N0T2	G3N0T2	484	492	yes	yes	2	0.022991	17,909	By MS/MS			1	0	1	1
TTVKVPGKR	GKEIDLLRTTVKVPGK	TVKVPGKRPPRATSAC	R	T	T	K	R	P	0	1	0	0	0	0	0	1	0	0	0	2	0	0	1	0	2	0	0	2	0	0	9	2	98,460,801	F1MGL2;E1BB02;E1BIQ2	F1MGL2	347	355	yes	no	2	0.022991	4,137	By MS/MS			1	0	1	1
TVHEFFKRK	PYHMPENKTVHEFFKR	VHEFFKRKPRPTCQGN	K	T	V	R	K	P	0	1	0	0	0	0	1	0	1	0	0	2	0	2	0	0	1	0	0	1	0	0	9	2	1,190,656	E1BIR1	E1BIR1	312	320	yes	yes	2	0.022991	53,098		By MS/MS		1	0	1
VADHRAKLR	CYRLVKDKVADHRAKL	ADHRAKLRELENLIAN	K	V	A	L	R	E	2	2	0	1	0	0	0	0	1	0	1	1	0	0	0	0	0	0	0	1	0	0	9	2	10,646,203	F1MD77	F1MD77	1041	1049	yes	yes	1	0.022991	13,579			By MS/MS	1	0	1
VENNDTGDVACDSYHKIAEDLAALQTLGVTHYRFSISWTR	TFSHTPLKVENNDTGD	RFSISWTRILPDGTNR	K	V	E	T	R	I	4	2	2	4	1	1	2	2	2	2	3	1	0	1	0	3	4	1	2	3	0	0	40	2	45,521,717	E1BK89	E1BK89	1417	1456	yes	yes	3	0.0087613	11,643	By MS/MS		By matching	1	0	2	1
VPIARPGRR	HGYTEVTKVPIARPGR	PIARPGRRLHNVWNPN	K	V	P	R	R	L	1	3	0	0	0	0	0	1	0	1	0	0	0	0	2	0	0	0	0	1	0	0	9	2	10,206,305	E1BPX1	E1BPX1	2506	2514	yes	yes	2	0.022991	20,175			By MS/MS	1	0	1
VSKMESKTK	EAMALTRRVSKMESKT	SKMESKTKTRVMAETK	R	V	S	T	K	T	0	0	0	0	0	0	1	0	0	0	0	3	1	0	0	2	1	0	0	1	0	0	9	2	10,365,587	G3X6U0	G3X6U0	68	76	yes	yes	2	0.022991	49,882			By MS/MS	1	0	1
VTFKANRPILVLIR	GRSLNSDRVTFKANRP	RPILVLIREVALNTII	R	V	T	I	R	E	1	2	1	0	0	0	0	0	0	2	2	1	0	1	1	0	1	0	0	2	0	0	14	2	16,390,297	P41361	P41361	433	446	yes	yes	3	0.022991	46,301	By MS/MS			1	0	1	1
VVVVVLQHR	SELAAREKVVVVVLQH	VVVVLQHRLGILGFLS	K	V	V	H	R	L	0	1	0	0	0	1	0	0	1	0	1	0	0	0	0	0	0	0	0	5	0	0	9	0	10,476,553	P0C6R3	P0C6R3	163	171	yes	yes	2	0.022991	83,405	By MS/MS			1	0	1	1
WEWLVNQHR	TGHADTTKWEWLVNQH	EWLVNQHRDSYCSYMG	K	W	E	H	R	D	0	1	1	0	0	1	1	0	1	0	1	0	0	0	0	0	0	2	0	1	0	0	9	0	12,666,258	Q56K13	Q56K13	29	37	yes	yes	2	0.022991	84,187		By MS/MS		1	0	1
WGRWSRGGR	GGRGRWGRWGRWSRGG	GRWSRGGRGRGGRGRG	R	W	G	G	R	G	0	3	0	0	0	0	0	3	0	0	0	0	0	0	0	1	0	2	0	0	0	0	9	2	11,165,689	F1N1C9	F1N1C9	1535	1543	yes	yes	2	0.022991	30,067			By MS/MS	1	0	1
WLNVQLSPR	ACDKARCRWLNVQLSP	LNVQLSPRQGSGSPGL	R	W	L	P	R	Q	0	1	1	0	0	1	0	0	0	0	2	0	0	0	1	1	0	1	0	1	0	0	9	0	11,116,138	A6QP30	A6QP30	502	510	yes	yes	2	0.022991	17,386			By MS/MS	1	0	1
WLNYLEVNR	KLILGNYKWLNYLEVN	LNYLEVNRRVNNFGSG	K	W	L	N	R	R	0	1	2	0	0	0	1	0	0	0	2	0	0	0	0	0	0	1	1	1	0	0	9	0	12,056,193	F1MBW3	F1MBW3	136	144	yes	yes	2	0.022991	11,363			By MS/MS	1	0	1
YEGEWLGNR	SQRSNGLRYEGEWLGN	EGEWLGNRRHGYGRTT	R	Y	E	N	R	R	0	1	1	0	0	0	2	2	0	0	1	0	0	0	0	0	0	1	1	0	0	0	9	0	11,225,094	E1BL01	E1BL01	305	313	yes	yes	2	0.022991	14,157		By MS/MS		1	0	2
YFFSLKTDR	DQGNRDPRYFFSLKTD	FFSLKTDRARQVTTIN	R	Y	F	D	R	A	0	1	0	1	0	0	0	0	0	0	1	1	0	2	0	1	1	0	1	0	0	0	9	1	11,755,975	F1N7Z6	F1N7Z6	32	40	yes	yes	2	0.022991	4,137			By MS/MS	1	0	1
YGDPGSPNSEPVGWIAAYGQGYIPNSGDVQGLQAAWEALQTSGR	YPPSQVTRYGDPGSPN	EALQTSGRPVTPGTLR	R	Y	G	G	R	P	5	1	2	2	0	4	2	8	0	2	2	0	0	0	4	4	1	2	3	2	0	0	44	0	45,631,367	A4IFA8;G3X6K1	A4IFA8	65	108	yes	no	4	0.018623	36,731	By MS/MS			1	0	1	1
YHYINCMIK	ECLQEESRYHYINCMI	HYINCMIKNLEVQLRR	R	Y	H	I	K	N	0	0	1	0	1	0	0	0	1	2	0	1	1	0	0	0	0	0	2	0	0	0	9	0	12,405,733	A2VDQ0	A2VDQ0	564	572	yes	yes	2	0.022991	55,877			By MS/MS	1	0	1
YKMPRLIAK	SVSDQFYRYKMPRLIA	KMPRLIAKVEGKGNGI	R	Y	K	A	K	V	1	1	0	0	0	0	0	0	0	1	1	2	1	0	1	0	0	0	1	0	0	0	9	2	11,186,634	F1N0F7	F1N0F7	16	24	yes	yes	2	0.022991	4,137			By MS/MS	1	0	1
YLLVPEKVK	TVEQLDQRYLLVPEKV	LLVPEKVKDAYLVHLI	R	Y	L	V	K	D	0	0	0	0	0	0	1	0	0	0	2	2	0	0	1	0	0	0	1	2	0	0	9	1	10,876,641	F1N0P2	F1N0P2	132	140	yes	yes	2	0.022991	4,137	By MS/MS			1	0	1	1
YLYLSTMER	LDGELLNRYLYLSTME	LYLSTMERGELAKKIG	R	Y	L	E	R	G	0	1	0	0	0	0	1	0	0	0	2	0	1	0	0	1	1	0	2	0	0	0	9	0	11,745,692	Q10569	Q10569	1408	1416	yes	yes	2	0.022991	18,035			By MS/MS	1	0	1
YSERIWTCK	EYEARLERYSERIWTC	SERIWTCKSTGSSQLT	R	Y	S	C	K	S	0	1	0	0	1	0	1	0	0	1	0	1	0	0	0	1	1	1	1	0	0	0	9	1	12,415,863	E1B6X6	E1B6X6	45	53	yes	yes	2	0.022991	57,813			By MS/MS	1	0	1
YYRFNEELR	TYFFRGNKYYRFNEEL	YRFNEELRIVESEYPK	K	Y	Y	L	R	I	0	2	1	0	0	0	2	0	0	0	1	0	0	1	0	0	0	0	2	0	0	0	9	1	1288.62	Q9GLE4;F1N1E3	Q9GLE4	434	442	yes	no	2	0.022991	17,386			By MS/MS	1	0	1
YYSIASSSK	LLPRLQARYYSIASSS	YSIASSSKVHPNSVHI	R	Y	Y	S	K	V	1	0	0	0	0	0	0	0	0	1	0	1	0	0	0	4	0	0	2	0	0	0	9	0	10,044,815	Q3SYT8;A5D9D3	Q3SYT8	455	463	yes	no	2	0.022991	11,769			By MS/MS	1	0	1
[truncated: 17 more columns]
