# Supplementary material for: Proteomic Analysis of Decellularized Extracellular Matrix: Achieving a Competent Biomaterial for Osteogenesis
Source: Biomed Res Int. 2022 Oct 11;2022:6884370. doi: 10.1155/2022/6884370 (PMC9578822; doi:10.1155/2022/6884370)
Supplement: Supplementary Materials — Supporting Information: an independent file is provided containing the following detailed information: Table S1: mass spectrometry-based protein identification and posttranslational modification data and Gene Ontology annotation for protein subsets identified in the different samples analyzed. Supp S1a: protein identifications by shotgun mass spectrometry. Supp S1b: identifications of proteins with the following posttranslational modifications: Cys-Cys, hydroxyproline, sulfation (Y), deamination (N), phosphorylation (ST), and oxidation (M). Supp T2c: Gene Ontology enriched categories for the whole set of identified proteins. Supp T2d: Gene Ontology enriched categories for the set of proteins with identified posttranslational modifications (PTMs). Supp T2e: set of all peptides identified by shotgun mass spectrometry. Supp T2f: set of peptides identified in proteins with posttranslational modifications (PTMs). Supp T2g: Gene Ontology annotation for the whole set of identified proteins. Supp T2h: Gene Ontology annotation for the set of proteins with posttranslational modifications (PTMs). Supp T2i: GO terms enriched for the set of proteins identified in the ECMt. Supp T2j: GO terms enriched for the set of proteins identified in the ECMb. Supp T2k: GO enriched for the set of proteins identified in the ECMp. Table S2: significance values for cell adhesion and proliferation assays. Significant p values for Student's t-test (α = 0.05): (a) cell adhesion after 4 h of incubation and (b) cell proliferation after 4, 8, 12, and 15 days. These measurements were performed using the Alamar Blue assay (BMMSCs MO-58) after continuous and stepwise digestion with trypsin, collagenase, and pepsin. Table S3: significance values for peptides and glycosaminoglycan quantification. Significant p values for Student's t-test (α = 0.05) in order to compare: (a–c) peptide quantification using BCA assay and (d, e) GAG quantification using DMMB assay, performed under continuous and stepwise diges [file 6884370.f1.zip › Suppl Table S2f. PROTEOMICS DATA.txt]

Supplemental table 2f. Peptides identified in the Proteome profile of PTMs from ECMs proteins
Sequence	N-term cleavage window	C-term cleavage window	Amino acid before	First amino acid	Second amino acid	Second last amino acid	Last amino acid	Amino acid after	A Count	R Count	N Count	D Count	C Count	Q Count	E Count	G Count	H Count	I Count	L Count	K Count	M Count	F Count	P Count	S Count	T Count	W Count	Y Count	V Count	U Count	O Count	Length	Missed cleavages	Mass	Proteins	Leading razor protein	Start position	End position	Unique (Groups)	Unique (Proteins)	Charges	PEP	Score	Identification type col eluido-_2-D,1_01_2589	Identification type ECMo eluido-_2-D,3_01_2591	Identification type ECMp eluido-_2-D,2_01_2590	Experiment col eluido-_2-D,1_01_2589	Experiment ECMo eluido-_2-D,3_01_2591	Experiment ECMp eluido-_2-D,2_01_2590	Intensity
ADQPRSPTSLRPK	SGGGYEFGFDGDFYRADQPRSPTSLRPKDY	YRADQPRSPTSLRPKDYEVDATLKSLNNQI	R	A	D	P	K	D	1	2	0	1	0	1	0	0	0	0	1	1	0	0	3	2	1	0	0	0	0	0	13	2	14,517,845	P02465	P02465	1117	1129	yes	yes	2	0.010345	55,353	By MS/MS			1			18991
DASKEELPGPGPDK	PGPDSAVGECEVLRRDASKEELPGPGPDKE	RDASKEELPGPGPDKERDMDLGPRHRLPSA	R	D	A	D	K	E	1	0	0	2	0	0	2	2	0	0	1	2	0	0	3	1	0	0	0	0	0	0	14	1	1,438,694	F1MW01	F1MW01	1526	1539	yes	yes	2	0.014848	47,894	By MS/MS		By matching	1		1	31152
DGEAGAQGPPGPAGPAGER	RGVPGPPGAVGPAGKDGEAGAQGPPGPAGP	GAQGPPGPAGPAGERGEQGPAGSPGFQGLP	K	D	G	E	R	G	4	1	0	1	0	1	2	6	0	0	0	0	0	0	4	0	0	0	0	0	0	0	19	0	16,897,707	P02453	P02453	612	630	yes	yes	2	0.0016454	69,716		By MS/MS			1		40705
DGLNGLPGPIGPPGPR	AGPRGPPGSAGSPGKDGLNGLPGPIGPPGP	GLNGLPGPIGPPGPRGRTGDAGPAGPPGPP	K	D	G	P	R	G	0	1	1	1	0	0	0	5	0	1	2	0	0	0	5	0	0	0	0	0	0	0	16	0	15,128,049	P02453	P02453	1152	1167	yes	yes	2	8.20E-04	113.69	By MS/MS	By MS/MS		3	12		0
DGSPGAKGDRGETGPAGPPGAPGAPGAPGPVGPAGK	SGREGAPGAEGSPGRDGSPGAKGDRGETGP	PGAPGAPGPVGPAGKSGDRGETGPAGPAGP	R	D	G	G	K	S	6	1	0	2	0	0	1	12	0	0	0	2	0	0	9	1	1	0	0	1	0	0	36	2	30,605,013	P02453	P02453	1026	1061	yes	yes	3;4	1.02E-86	136.12		By MS/MS			4		3846500
EELPGPGPDKER	SAVGECEVLRRDASKEELPGPGPDKERDMD	ASKEELPGPGPDKERDMDLGPRHRLPSAPV	K	E	E	E	R	D	0	1	0	1	0	0	3	2	0	0	1	1	0	0	3	0	0	0	0	0	0	0	12	1	13,226,466	F1MW01	F1MW01	1530	1541	yes	yes	2	0.0068726	50,805	By MS/MS			1			0
EFRDLPSIEER	LQTITSDPRLVFTVREFRDLPSIEERMVNS	FTVREFRDLPSIEERMVNSFGSSGVTPAPP	R	E	F	E	R	M	0	2	0	1	0	0	3	0	0	1	1	0	0	1	1	1	0	0	0	0	0	0	11	1	13,896,888	G3N3E4;E1BB91	G3N3E4	1595	1605	yes	no	3	0.0016388	55,452			By MS/MS			1	22280
EGPVGLPGIDGR	RGFPGSPGNIGPAGKEGPVGLPGIDGRPGP	AGKEGPVGLPGIDGRPGPIGPAGARGEPGN	K	E	G	G	R	P	0	1	0	1	0	0	1	4	0	1	1	0	0	0	2	0	0	0	0	1	0	0	12	0	11,656,091	P02465	P02465	463	474	yes	yes	2	9.60E-60	128.52		By MS/MS	By MS/MS		1	2	372240
EGPVGLPGIDGRPGPIGPAGAR	RGFPGSPGNIGPAGKEGPVGLPGIDGRPGP	GIDGRPGPIGPAGARGEPGNIGFPGPKGPS	K	E	G	A	R	G	2	2	0	1	0	0	1	7	0	2	1	0	0	0	5	0	0	0	0	1	0	0	22	1	20,390,912	P02465	P02465	463	484	yes	yes	2;3	5.58E-260	189.55	By MS/MS	By MS/MS		5	4		25792000
EGPVGLPGIDGRPGPIGPAGARGEPGNIGFPGPK	RGFPGSPGNIGPAGKEGPVGLPGIDGRPGP	GARGEPGNIGFPGPKGPSGDPGKAGEKGHA	K	E	G	P	K	G	2	2	1	1	0	0	2	11	0	3	1	1	0	1	8	0	0	0	0	1	0	0	34	2	31,896,683	P02465	P02465	463	496	yes	yes	4	5.10E-20	100.68	By MS/MS	By MS/MS		1	2		2870500
ESLLEEFR	PTITVKLYGREPQLRESLLEEFREVALGVG	GREPQLRESLLEEFREVALGVGIPEDAIFT	R	E	S	F	R	E	0	1	0	0	0	0	3	0	0	0	2	0	0	1	0	1	0	0	0	0	0	0	8	0	1,021,508	P00978;F1MMK9;CON__P00978	P00978	159	166	yes	no	2	2.44E-06	96,253			By MS/MS			1	27261
FSALQYLR	DNNKISNIPDEYFKRFSALQYLRLSHNELA	PDEYFKRFSALQYLRLSHNELADSGVPGNS	R	F	S	L	R	L	1	1	0	0	0	1	0	0	0	0	2	0	0	1	0	1	0	0	1	0	0	0	8	0	99,653,927	Q05443;CON__Q05443	Q05443	232	239	yes	no	2	6.50E-02	86,866			By MS/MS			1	30124
GAAGIPGGKGEKGETGLR	GTAGPSGPSGLPGERGAAGIPGGKGEKGET	GIPGGKGEKGETGLRGDIGSPGRDGARGAP	R	G	A	L	R	G	2	1	0	0	0	0	2	7	0	1	1	2	0	0	1	0	1	0	0	0	0	0	18	2	16,538,798	P02465	P02465	644	661	yes	yes	3	0.0075857	40,856		By MS/MS			1		33725
GAAGLPGPKGDRGDAGPK	GSQGAPGLQGMPGERGAAGLPGPKGDRGDA	GLPGPKGDRGDAGPKGADGAPGKDGVRGLT	R	G	A	P	K	G	3	1	0	2	0	0	0	6	0	0	1	2	0	0	3	0	0	0	0	0	0	0	18	2	1,619,838	P02453	P02453	733	750	yes	yes	3;4	0.0011657	72,446	By MS/MS	By MS/MS		1	1		166010
GANGAPGIAGAPGFPGAR	GPAGNPGADGQPGAKGANGAPGIAGAPGFP	GAPGIAGAPGFPGARGPSGPQGPSGPPGPK	K	G	A	A	R	G	5	1	1	0	0	0	0	6	0	1	0	0	0	1	3	0	0	0	0	0	0	0	18	0	15,367,797	P02453	P02453	397	414	yes	yes	2	0	260.6	By MS/MS	By MS/MS	By matching	1	2	1	22456000
GAPGADGPAGAPGTPGPQGIAGQR	GEVGPPGPPGPAGEKGAPGADGPAGAPGTP	GAPGTPGPQGIAGQRGVVGLPGQRGERGFP	K	G	A	Q	R	G	5	1	0	1	0	2	0	8	0	1	0	0	0	0	5	0	1	0	0	0	0	0	24	0	20,560,086	P02453	P02453	934	957	yes	yes	2;3	8.62E-290	196.22	By MS/MS	By MS/MS		1	3		377710
GAPGAIGAPGPAGANGDRGEAGPAGPAGPAGPR	GLRGDIGSPGRDGARGAPGAIGAPGPAGAN	GEAGPAGPAGPAGPRGSPGERGEVGPAGPN	R	G	A	P	R	G	9	2	1	1	0	0	1	11	0	1	0	0	0	0	7	0	0	0	0	0	0	0	33	1	27,473,488	P02465	P02465	674	706	yes	yes	3;4	4.35E-70	130.26	By MS/MS	By MS/MS	By MS/MS	1	2	1	10833000
GAPGDRGEPGPPGPAGFAGPPGADGQPGAK	GEAGPSGPAGPTGARGAPGDRGEPGPPGPA	GFAGPPGADGQPGAKGEPGDAGAKGDAGPP	R	G	A	A	K	G	5	1	0	2	0	1	1	10	0	0	0	1	0	1	8	0	0	0	0	0	0	0	30	1	26,382,524	P02453	P02453	796	825	yes	yes	3	7.18E-04	68,368		By MS/MS			1		211170
GAPGPQGPPGAPGPLGIAGLTGAR	GISGPKGDSGPPGERGAPGPQGPPGAPGPL	GAPGPLGIAGLTGARGLAGPPGMPGARGSP	R	G	A	A	R	G	4	1	0	0	0	1	0	8	0	1	2	0	0	0	6	0	1	0	0	0	0	0	24	0	20,651,069	P04258;F1N2Y4;F1MXS8;CON__P04258	P04258	777	800	yes	no	2;3	9.93E-15	125.77	By MS/MS	By MS/MS	By MS/MS	5	1	4	104260
GARGEPGPAGLPGPPGER	GIQGPPGPAGEEGKRGARGEPGPAGLPGPP	GEPGPAGLPGPPGERGGPGSRGFPGADGVA	R	G	A	E	R	G	2	2	0	0	0	0	2	6	0	0	1	0	0	0	5	0	0	0	0	0	0	0	18	1	16,708,489	P02453	P02453	469	486	yes	yes	3	0.00075735	60,528		By MS/MS			1		122980
GATGPAGVRGPNGDSGRPGEPGLMGPR	GADGRAGVMGPAGSRGATGPAGVRGPNGDS	GDSGRPGEPGLMGPRGFPGSPGNIGPAGKE	R	G	A	P	R	G	2	3	1	1	0	0	1	9	0	0	1	0	1	0	5	1	1	0	0	1	0	0	27	2	25,162,303	P02465	P02465	422	448	yes	yes	3;4	0.0013808	55,049		By MS/MS	By MS/MS		3	1	1220000
GDAGAPGAPGSQGAPGLQGMPGER	GPRGANGAPGNDGAKGDAGAPGAPGSQGAP	GSQGAPGLQGMPGERGAAGLPGPKGDRGDA	K	G	D	E	R	G	4	1	0	1	0	2	1	8	0	0	1	0	1	0	4	1	0	0	0	0	0	0	24	0	21,339,862	P02453	P02453	709	732	yes	yes	2	0.00103	54.7	By MS/MS			2			100900
GDAGPPGPAGPAGPPGPIGNVGAPGPKGAR	GQPGAKGEPGDAGAKGDAGPPGPAGPAGPP	GPIGNVGAPGPKGARGSAGPPGATGFPGAA	K	G	D	A	R	G	5	1	1	1	0	0	0	10	0	1	0	1	0	0	9	0	0	0	0	1	0	0	30	1	25,423,041	P02453	P02453	835	864	yes	yes	3	1.59E-231	184.51	By MS/MS			3			1045100
GDGGPPGATGFPGAAGR	GPSGPNGPPGPAGSRGDGGPPGATGFPGAA	GGPPGATGFPGAAGRTGPPGPSGISGPPGP	R	G	D	G	R	T	3	1	0	1	0	0	0	7	0	0	0	0	0	1	3	0	1	0	0	0	0	0	17	0	14,406,746	P02465	P02465	776	792	yes	yes	2	1.21E-04	73,435	By MS/MS			5			0
GDLARGVEGLTR	AANPEWVSPFSFLERGDLARGVEGLTRERA	LERGDLARGVEGLTRERARWLSRPALLVRA	R	G	D	T	R	E	1	2	0	1	0	0	1	3	0	0	2	0	0	0	0	0	1	0	0	1	0	0	12	1	1,242,668	A6QP44	A6QP44	644	655	yes	yes	2	5.81E-02	68,224	By MS/MS			1			0
GDRGETGPAGPPGAPGAPGAPGPVGPAGK	GAEGSPGRDGSPGAKGDRGETGPAGPPGAP	PGAPGAPGPVGPAGKSGDRGETGPAGPAGP	K	G	D	G	K	S	5	1	0	1	0	0	1	10	0	0	0	1	0	0	8	0	1	0	0	1	0	0	29	1	24,482,146	P02453	P02453	1033	1061	yes	yes	3	9.13E-55	122.35	By MS/MS	By MS/MS		2	2		2514600
GELGPVGNPGPAGPAGPR	GSAGPPGFPGAPGPKGELGPVGNPGPAGPA	GPVGNPGPAGPAGPRGEVGLPGLSGPVGPP	K	G	E	P	R	G	2	1	1	0	0	0	1	6	0	0	1	0	0	0	5	0	0	0	0	1	0	0	18	0	15,988,165	P02465	P02465	263	280	yes	yes	2	2.39E-176	167.2	By MS/MS	By MS/MS		2	1		610780
GENGPVGPTGPVGAAGPSGPNGPPGPAGSR	GQPGAKGERGTKGPKGENGPVGPTGPVGAA	GPSGPNGPPGPAGSRGDGGPPGATGFPGAA	K	G	E	S	R	G	3	1	2	0	0	0	1	10	0	0	0	0	0	0	8	2	1	0	0	2	0	0	30	0	25,642,368	P02465	P02465	746	775	yes	yes	3	4.22E-11	90,435	By MS/MS			1			159470
GEPGDAGAKGDAGPPGPAGPAGPPGPIGNVGAPGPK	GFAGPPGADGQPGAKGEPGDAGAKGDAGPP	GPPGPIGNVGAPGPKGARGSAGPPGATGFP	K	G	E	P	K	G	6	0	1	2	0	0	1	12	0	1	0	2	0	0	10	0	0	0	0	1	0	0	36	1	30,405,003	P02453	P02453	826	861	yes	yes	3	0.0051785	41,476	By MS/MS			1			46892
GEPGDAGAKGDAGPPGPAGPAGPPGPIGNVGAPGPKGAR	GFAGPPGADGQPGAKGEPGDAGAKGDAGPP	GPIGNVGAPGPKGARGSAGPPGATGFPGAA	K	G	E	A	R	G	7	1	1	2	0	0	1	13	0	1	0	2	0	0	10	0	0	0	0	1	0	0	39	2	33,246,599	P02453	P02453	826	864	yes	yes	4	6.84E-58	126.63	By MS/MS			2			689540
GEPGLVPVVTGIR	GGGNTNFGRGRKGQKGEPGLVPVVTGIRGR	QKGEPGLVPVVTGIRGRPGPAGPPGSQGPR	K	G	E	I	R	G	0	1	0	0	0	0	1	3	0	1	1	0	0	0	2	0	1	0	0	3	0	0	13	0	12,927,452	F1N2Y2	F1N2Y2	115	127	yes	yes	2	2.27E-15	106.62	By MS/MS			1			114480
GEPGNIGFPGPKGPSGDPGK	GIDGRPGPIGPAGARGEPGNIGFPGPKGPS	IGFPGPKGPSGDPGKAGEKGHAGLAGARGA	R	G	E	G	K	A	0	0	1	1	0	0	1	7	0	1	0	2	0	1	5	1	0	0	0	0	0	0	20	1	18,639,115	P02465	P02465	485	504	yes	yes	3	1.43E-04	90,316	By MS/MS			2			400560
GEPGNIGFPGPKGPSGDPGKAGEK	GIDGRPGPIGPAGARGEPGNIGFPGPKGPS	GPKGPSGDPGKAGEKGHAGLAGARGAPGPD	R	G	E	E	K	G	1	0	1	1	0	0	2	8	0	1	0	3	0	1	5	1	0	0	0	0	0	0	24	2	22,491,077	P02465	P02465	485	508	yes	yes	4	0.0059607	41,208		By MS/MS			1		108240
GEPGPAGLPGPPGER	GPPGPAGEEGKRGARGEPGPAGLPGPPGER	GEPGPAGLPGPPGERGGPGSRGFPGADGVA	R	G	E	E	R	G	1	1	0	0	0	0	2	5	0	0	1	0	0	0	5	0	0	0	0	0	0	0	15	0	13,866,892	P02453	P02453	472	486	yes	yes	2	1.21E-232	179.94	By MS/MS	By MS/MS	By MS/MS	1	1	1	2239000
GEPGPTGIQGPPGPAGEEGK	GEPGAPGSKGDTGAKGEPGPTGIQGPPGPA	TGIQGPPGPAGEEGKRGARGEPGPAGLPGP	K	G	E	G	K	R	1	0	0	0	0	1	3	7	0	1	0	1	0	0	5	0	1	0	0	0	0	0	20	0	18,308,748	P02453	P02453	448	467	yes	yes	2	6.13E-29	112.24		By MS/MS			1		87109
GEPGPTGIQGPPGPAGEEGKR	GEPGAPGSKGDTGAKGEPGPTGIQGPPGPA	GIQGPPGPAGEEGKRGARGEPGPAGLPGPP	K	G	E	K	R	G	1	1	0	0	0	1	3	7	0	1	0	1	0	0	5	0	1	0	0	0	0	0	21	1	19,869,759	P02453	P02453	448	468	yes	yes	3	1.46E-61	129.02	By MS/MS	By MS/MS		1	2		326420
GEPGVVGAPGTAGPSGPSGLPGER	GSRGPSGPPGPDGNKGEPGVVGAPGTAGPS	GTAGPSGPSGLPGERGAAGIPGGKGEKGET	K	G	E	E	R	G	2	1	0	0	0	0	2	8	0	0	1	0	0	0	5	2	1	0	0	2	0	0	24	0	21,020,392	P02465	P02465	620	643	yes	yes	2	0.0059889	45,587		By MS/MS			1		0
GEQGPAGPPGFQGLPGPAGTAGEAGKPGER	GAQGPPGLQGVQGGKGEQGPAGPPGFQGLP	GPAGTAGEAGKPGERGIPGEFGLPGPAGAR	K	G	E	E	R	G	4	1	0	0	0	2	3	10	0	0	1	1	0	1	6	0	1	0	0	0	0	0	30	1	27,433,314	P02465	P02465	542	571	yes	yes	3	9.96E-04	67,459		By MS/MS	By matching		1	1	85631
GERGLPGVAGSVGEPGPLGIAGPPGAR	GLLGAPGFLGLPGSRGERGLPGVAGSVGEP	GEPGPLGIAGPPGARGPPGNVGNPGVNGAP	R	G	E	A	R	G	3	2	0	0	0	0	2	9	0	1	2	0	0	0	5	1	0	0	0	2	0	0	27	1	24,242,874	P02465	P02465	878	904	yes	yes	3	5.26E-03	77,939		By MS/MS	By MS/MS		1	4	111330
GERGPPGESGAAGPTGPIGSR	GIPGEFGLPGPAGARGERGPPGESGAAGPT	GESGAAGPTGPIGSRGPSGPPGPDGNKGEP	R	G	E	S	R	G	2	2	0	0	0	0	2	7	0	1	0	0	0	0	4	2	1	0	0	0	0	0	21	1	19,059,293	P02465	P02465	587	607	yes	yes	3	2.14E-21	105.96		By MS/MS			1		204430
GETGPAGRPGEVGPPGPPGPAGEKGAPGADGPAGAPGTPGPQGIAGQR	GPPGPAGKEGSKGPRGETGPAGRPGEVGPP	GAPGTPGPQGIAGQRGVVGLPGQRGERGFP	R	G	E	Q	R	G	7	2	0	1	0	2	3	16	0	1	0	1	0	0	12	0	2	0	0	1	0	0	48	2	42,050,638	P02453	P02453	910	957	yes	yes	4	1.83E-07	69,436	By MS/MS			2			260970
GFPGADGVAGPK	GLPGPPGERGGPGSRGFPGADGVAGPKGPA	GSRGFPGADGVAGPKGPAGERGAPGPAGPK	R	G	F	P	K	G	2	0	0	1	0	0	0	4	0	0	0	1	0	1	2	0	0	0	0	1	0	0	12	0	10,715,349	P02453	P02453	493	504	yes	yes	2	0.0083736	51,268		By MS/MS			1		0
GFPGADGVAGPKGPAGER	GLPGPPGERGGPGSRGFPGADGVAGPKGPA	GADGVAGPKGPAGERGAPGPAGPKGSPGEA	R	G	F	E	R	G	3	1	0	1	0	0	1	6	0	0	0	1	0	1	3	0	0	0	0	1	0	0	18	1	16,388,114	P02453	P02453	493	510	yes	yes	2;3	0	233.19	By MS/MS	By MS/MS		2	3		2005200
GFPGLPGPSGEPGK	GQRGVVGLPGQRGERGFPGLPGPSGEPGKQ	RGFPGLPGPSGEPGKQGPSGASGERGPPGP	R	G	F	G	K	Q	0	0	0	0	0	0	1	5	0	0	1	1	0	1	4	1	0	0	0	0	0	0	14	0	1,295,651	P02453;F1MSR8;P02459	P02453	970	983	no	no	2	1.73E-17	108.1		By MS/MS	By matching		3	1	244690
GFPGLPGPSGEPGKQGAPGASGDRGPPGPVGPPGLTGPAGEPGR	GQRGIVGLPGQRGERGFPGLPGPSGEPGKQ	VGPPGLTGPAGEPGREGSPGADGPPGRDGA	R	G	F	G	R	E	3	2	0	1	0	1	2	15	0	0	2	1	0	1	12	2	1	0	0	1	0	0	44	2	39,399,616	F1MSR8;P02459	F1MSR8	924	967	yes	no	4	6.60E-07	66,817	By MS/MS			1			290800
GFPGLPGPSGEPGKQGPSGASGERGPPGPMGPPGLAGPPGESGR	GQRGVVGLPGQRGERGFPGLPGPSGEPGKQ	MGPPGLAGPPGESGREGAPGAEGSPGRDGS	R	G	F	G	R	E	2	2	0	0	0	1	3	15	0	0	2	1	1	1	12	4	0	0	0	0	0	0	44	2	39,879,286	P02453	P02453	970	1013	yes	yes	4	1.10E-09	76,003		By MS/MS			2		521340
GFPGSPGNIGPAGK	GDSGRPGEPGLMGPRGFPGSPGNIGPAGKE	RGFPGSPGNIGPAGKEGPVGLPGIDGRPGP	R	G	F	G	K	E	1	0	1	0	0	0	0	5	0	1	0	1	0	1	3	1	0	0	0	0	0	0	14	0	12,546,357	P02465	P02465	449	462	yes	yes	2	6.48E-35	121.83	By MS/MS	By MS/MS		1	1		2525900
GFPGSPGNIGPAGKEGPVGLPGIDGR	GDSGRPGEPGLMGPRGFPGSPGNIGPAGKE	AGKEGPVGLPGIDGRPGPIGPAGARGEPGN	R	G	F	G	R	P	1	1	1	1	0	0	1	9	0	2	1	1	0	1	5	1	0	0	0	1	0	0	26	1	24,022,343	P02465	P02465	449	474	yes	yes	3	1.31E-02	65,779		By MS/MS			1		162570
GFPGSPGNIGPAGKEGPVGLPGIDGRPGPIGPAGAR	GDSGRPGEPGLMGPRGFPGSPGNIGPAGKE	GIDGRPGPIGPAGARGEPGNIGFPGPKGPS	R	G	F	A	R	G	3	2	1	1	0	0	1	12	0	3	1	1	0	1	8	1	0	0	0	1	0	0	36	2	32,757,163	P02465	P02465	449	484	yes	yes	4	2.09E-233	179.41		By MS/MS			4		1753900
GFPGTPGLPGFK	GRPGERGVVGPQGARGFPGTPGLPGFKGIR	GARGFPGTPGLPGFKGIRGHNGLDGLKGQP	R	G	F	F	K	G	0	0	0	0	0	0	0	4	0	0	1	1	0	2	3	0	1	0	0	0	0	0	12	0	11,736,182	P02465	P02465	164	175	yes	yes	2	2.90E-35	120.12	By MS/MS	By MS/MS		1	16		338920
GFSGLDGAKGDAGPAGPK	GLPGTAGLPGMKGHRGFSGLDGAKGDAGPA	GLDGAKGDAGPAGPKGEPGSPGENGAPGQM	R	G	F	P	K	G	3	0	0	2	0	0	0	6	0	0	1	2	0	1	2	1	0	0	0	0	0	0	18	1	16,007,845	P02453	P02453	268	285	yes	yes	2	4.82E-01	82,543		By MS/MS			1		79643
GFSGLDGAKGDAGPAGPKGEPGSPGENGAPGQMGPR	GLPGTAGLPGMKGHRGFSGLDGAKGDAGPA	GSPGENGAPGQMGPRGLPGERGRPGAPGPA	R	G	F	P	R	G	4	1	1	2	0	1	2	12	0	0	1	2	1	1	6	2	0	0	0	0	0	0	36	2	32,765,218	P02453	P02453	268	303	yes	yes	4	7.67E-14	90.03	By MS/MS	By MS/MS		2	3		4012000
GFSGLQGPPGPPGSPGEQGPSGASGPAGPR	GETGEQGDRGIKGHRGFSGLQGPPGPPGSP	GEQGPSGASGPAGPRGPPGSAGSPGKDGLN	R	G	F	P	R	G	2	1	0	0	0	2	1	10	0	0	1	0	0	1	8	4	0	0	0	0	0	0	30	0	2,656,263	P02453	P02453	1111	1140	yes	yes	2;3	4.98E-289	193.57	By MS/MS	By MS/MS	By matching	4	2	1	6282200
GGGPGPMGLMGPR	PPGLGGNFAAQFDAKGGGPGPMGLMGPRGP	AKGGGPGPMGLMGPRGPPGASGAPGPQGFQ	K	G	G	P	R	G	0	1	0	0	0	0	0	6	0	0	1	0	2	0	3	0	0	0	0	0	0	0	13	0	11,825,638	P02465	P02465	85	97	yes	yes	2	0.00061362	66,692	By MS/MS	By MS/MS		1	2		170140
GGPGSRGFPGADGVAGPK	GEPGPAGLPGPPGERGGPGSRGFPGADGVA	GSRGFPGADGVAGPKGPAGERGAPGPAGPK	R	G	G	P	K	G	2	1	0	1	0	0	0	7	0	0	0	1	0	1	3	1	0	0	0	1	0	0	18	1	15,827,852	P02453	P02453	487	504	yes	yes	3	0.0072759	42,068		By MS/MS			1		75218
GIPGEFGLPGPAGAR	GPAGTAGEAGKPGERGIPGEFGLPGPAGAR	GIPGEFGLPGPAGARGERGPPGESGAAGPT	R	G	I	A	R	G	2	1	0	0	0	0	1	5	0	1	1	0	0	1	3	0	0	0	0	0	0	0	15	0	13,947,306	P02465	P02465	572	586	yes	yes	2	0	213.8	By MS/MS	By MS/MS	By MS/MS	5	5	2	20238000
GIPGEFGLPGPAGARGER	GPAGTAGEAGKPGERGIPGEFGLPGPAGAR	GEFGLPGPAGARGERGPPGESGAAGPTGPI	R	G	I	E	R	G	2	2	0	0	0	0	2	6	0	1	1	0	0	1	3	0	0	0	0	0	0	0	18	1	17,368,958	P02465	P02465	572	589	yes	yes	2	0.00098047	75,479		By MS/MS			1		213020
GIPGEFGLPGPAGARGERGPPGESGAAGPTGPIGSR	GPAGTAGEAGKPGERGIPGEFGLPGPAGAR	GESGAAGPTGPIGSRGPSGPPGPDGNKGEP	R	G	I	S	R	G	4	3	0	0	0	0	3	12	0	2	1	0	0	1	7	2	1	0	0	0	0	0	36	2	32,826,494	P02465	P02465	572	607	yes	yes	4	3.86E-04	77,079	By MS/MS	By MS/MS		1	1		382430
GIPGPVGAAGATGAR	GLPGVAGAPGLPGPRGIPGPVGAAGATGAR	GIPGPVGAAGATGARGLVGEPGPAGSKGES	R	G	I	A	R	G	4	1	0	0	0	0	0	5	0	1	0	0	0	0	2	0	1	0	0	1	0	0	15	0	12,506,731	P02465	P02465	326	340	yes	yes	2	2.90E-294	191.55	By MS/MS		By MS/MS	1		1	8809900
GIPGSPGGPGSNGKPGPPGSQGETGRPGPPGSPGPR	GEPGRNGLPGGPGLRGIPGSPGGPGSNGKP	GETGRPGPPGSPGPRGQPGVMGFPGPKGND	R	G	I	P	R	G	0	2	1	0	0	1	1	13	0	1	0	1	0	0	11	4	1	0	0	0	0	0	36	2	32,005,711	P04258	P04258	381	416	yes	yes	5	0.0032043	56,728		By MS/MS			1		7511.8
GLPGADGRAGVMGPAGSR	GPPGPPGLRGNPGSRGLPGADGRAGVMGPA	GADGRAGVMGPAGSRGATGPAGVRGPNGDS	R	G	L	S	R	G	3	2	0	1	0	0	0	6	0	0	1	0	1	0	2	1	0	0	0	1	0	0	18	1	16,248,104	P02465	P02465	404	421	yes	yes	3	7.29E-01	79.97		By MS/MS			1		187480
GLPGVAGSVGEPGPLGIAGPPGAR	GAPGFLGLPGSRGERGLPGVAGSVGEPGPL	GEPGPLGIAGPPGARGPPGNVGNPGVNGAP	R	G	L	A	R	G	3	1	0	0	0	0	1	8	0	1	2	0	0	0	5	1	0	0	0	2	0	0	24	0	20,821,222	P02465	P02465	881	904	yes	yes	2;3	0	401.16	By MS/MS	By MS/MS	By MS/MS	14	15	3	22185000
GLTGPIGPPGPAGAPGDKGEAGPSGPAGPTGAR	GPKGADGAPGKDGVRGLTGPIGPPGPAGAP	GEAGPSGPAGPTGARGAPGDRGEPGPPGPA	R	G	L	A	R	G	5	1	0	1	0	0	1	11	0	1	1	1	0	0	8	1	2	0	0	0	0	0	33	1	28,204,155	P02453	P02453	763	795	yes	yes	3;4	3.54E-47	155.1	By MS/MS	By MS/MS	By MS/MS	3	4	2	602010
GLTGSPGSPGPDGK	GEAGRPGEAGLPGAKGLTGSPGSPGPDGKT	KGLTGSPGSPGPDGKTGPPGPAGQDGRPGP	K	G	L	G	K	T	0	0	0	1	0	0	0	5	0	0	1	1	0	0	3	2	1	0	0	0	0	0	14	0	12,255,939	P02453	P02453	538	551	yes	yes	2	9.70E-46	122.51	By MS/MS	By MS/MS		1	1		112450
GLTGSPGSPGPDGKTGPPGPAGQDGRPGPPGPPGAR	GEAGRPGEAGLPGAKGLTGSPGSPGPDGKT	GQDGRPGPPGPPGARGQAGVMGFPGPKGAA	K	G	L	A	R	G	2	2	0	2	0	1	0	12	0	0	1	1	0	0	11	2	2	0	0	0	0	0	36	2	31,995,759	P02453	P02453	538	573	yes	yes	4	0.00024709	55,629		By MS/MS			1		117440
GLVGEPGPAGSK	GIPGPVGAAGATGARGLVGEPGPAGSKGES	GARGLVGEPGPAGSKGESGNKGEPGAVGQP	R	G	L	S	K	G	1	0	0	0	0	0	1	4	0	0	1	1	0	0	2	1	0	0	0	1	0	0	12	0	10,675,611	P02465	P02465	341	352	yes	yes	2	0.0022827	52,278	By matching	By MS/MS		1	1		36081
GLVGEPGPAGSKGESGNKGEPGAVGQPGPPGPSGEEGK	GIPGPVGAAGATGARGLVGEPGPAGSKGES	VGQPGPPGPSGEEGKRGSTGEIGPAGPPGP	R	G	L	G	K	R	2	0	1	0	0	1	5	13	0	0	1	3	0	0	7	3	0	0	0	2	0	0	38	2	34,246,495	P02465	P02465	341	378	yes	yes	4	0.00012176	56,637		By MS/MS			1		144130
GNDGATGAAGPPGPTGPAGPPGFPGAVGAK	GERGRPGAPGPAGARGNDGATGAAGPPGPT	GPAGPPGFPGAVGAKGEGGPQGPRGSEGPQ	R	G	N	A	K	G	6	0	1	1	0	0	0	10	0	0	0	1	0	1	7	0	2	0	0	1	0	0	30	0	24,992,142	P02453	P02453	322	351	yes	yes	3	2.69E-07	83,834		By MS/MS			2		601260
GNDGATGAAGPPGPTGPAGPPGFPGAVGAKGEGGPQGPR	GERGRPGAPGPAGARGNDGATGAAGPPGPT	GAVGAKGEGGPQGPRGSEGPQGVRGEPGPP	R	G	N	P	R	G	6	1	1	1	0	1	1	14	0	0	0	1	0	1	9	0	2	0	0	1	0	0	39	1	33,346,079	P02453	P02453	322	360	yes	yes	3	0.00025491	53,206		By MS/MS			1		30438
GPAGPSGPAGKDGR	GDQGAPGAVGPAGPRGPAGPSGPAGKDGRI	RGPAGPSGPAGKDGRIGQPGAVGPAGIRGS	R	G	P	G	R	I	2	1	0	1	0	0	0	5	0	0	0	1	0	0	3	1	0	0	0	0	0	0	14	1	12,226,054	P02465	P02465	1052	1065	yes	yes	2	0.014186	42,338		By MS/MS	By matching		1	1	25434
GPKGENGPVGPTGPVGAAGPSGPNGPPGPAGSR	GAAGQPGAKGERGTKGPKGENGPVGPTGPV	GPSGPNGPPGPAGSRGDGGPPGATGFPGAA	K	G	P	S	R	G	3	1	2	0	0	0	1	11	0	0	0	1	0	0	9	2	1	0	0	2	0	0	33	1	2,846,406	P02465	P02465	743	775	yes	yes	3	1.13E-06	71,604	By MS/MS	By MS/MS		2	1		177470
GPLYSNVLTPDKIPDFFIPPK	ENGAAGGEGGDKAAKGPLYSNVLTPDKIPD	VLTPDKIPDFFIPPKLPAGPAEPEAQAELG	K	G	P	P	K	L	0	0	1	2	0	0	0	1	0	2	2	2	0	2	5	1	1	0	1	1	0	0	21	1	23,572,671	G3N2V3	G3N2V3	32	52	yes	yes	3	0.00011207	79,511	By MS/MS	By MS/MS	By MS/MS	1	2	1	15052000
GPPAPTAATPAPASPFPSATGSMTYSLVAPK	VATSTTPPAAPILPKGPPAPTAATPAPASP	PSATGSMTYSLVAPKAQRPTPKAPQKVKAA	K	G	P	P	K	A	7	0	0	0	0	0	0	2	0	0	1	1	1	1	8	4	4	0	1	1	0	0	31	0	29,394,739	G3MX46	G3MX46	2036	2066	yes	yes	3	0.0011735	54,141	By MS/MS		By MS/MS	2		1	23252000
GPPGASGAPGPQGFQGPPGEPGEPGQTGPAGAR	AKGGGPGPMGLMGPRGPPGASGAPGPQGFQ	GEPGEPGQTGPAGARGPPGPPGKAGEDGHP	R	G	P	A	R	G	4	1	0	0	0	3	2	11	0	0	0	0	0	1	9	1	1	0	0	0	0	0	33	0	29,363,801	P02465	P02465	98	130	yes	yes	3	6.08E-12	91,926	By MS/MS			2			88927
GPPGESGAAGPTGPIGSR	GEFGLPGPAGARGERGPPGESGAAGPTGPI	GESGAAGPTGPIGSRGPSGPPGPDGNKGEP	R	G	P	S	R	G	2	1	0	0	0	0	1	6	0	1	0	0	0	0	4	2	1	0	0	0	0	0	18	0	15,637,641	P02465	P02465	590	607	yes	yes	2	0	416.67		By MS/MS			4		3911200
GPPGNVGNPGVNGAPGEAGR	GEPGPLGIAGPPGARGPPGNVGNPGVNGAP	VGNPGVNGAPGEAGRDGNPGNDGPPGRDGQ	R	G	P	G	R	D	2	1	3	0	0	0	1	7	0	0	0	0	0	0	4	0	0	0	0	2	0	0	20	0	17,728,554	P02465	P02465	905	924	yes	yes	2	6.87E-291	195.94		By MS/MS			1		263920
GPPGPMGPPGLAGPPGESGR	GEPGKQGPSGASGERGPPGPMGPPGLAGPP	MGPPGLAGPPGESGREGAPGAEGSPGRDGS	R	G	P	G	R	E	1	1	0	0	0	0	1	7	0	0	1	0	1	0	7	1	0	0	0	0	0	0	20	0	17,838,676	P02453	P02453	994	1013	yes	yes	2;3	6.52E-112	150.11	By MS/MS	By MS/MS		4	2		480810
GPPGPPGTNGVPGQR	GPAGIPGAPGLIGARGPPGPPGTNGVPGQR	GPPGPPGTNGVPGQRGAAGEPGKNGAKGDP	R	G	P	Q	R	G	0	1	1	0	0	1	0	5	0	0	0	0	0	0	5	0	1	0	0	1	0	0	15	0	13,867,004	P04258;F1N2Y4;F1MXS8;CON__P04258	P04258	258	272	yes	no	2	2.26E-178	166.97			By MS/MS			1	195050
GPPGPQGLPGLAGTAGEPGR	GENGKPGPSGQNGERGPPGPQGLPGLAGTA	QGLPGLAGTAGEPGRDGNPGSDGLPGRDGA	R	G	P	G	R	D	2	1	0	0	0	1	1	7	0	0	2	0	0	0	5	0	1	0	0	0	0	0	20	0	17,849,169	P04258;F1N2Y4;F1MXS8;CON__P04258	P04258	837	856	yes	no	2	1.70E-07	93,494			By MS/MS			1	89490
GPPGSAGSPGKDGLNGLPGPIGPPGPR	GEQGPSGASGPAGPRGPPGSAGSPGKDGLN	GLNGLPGPIGPPGPRGRTGDAGPAGPPGPP	R	G	P	P	R	G	1	1	1	1	0	0	0	9	0	1	2	1	0	0	8	2	0	0	0	0	0	0	27	1	24,052,452	P02453	P02453	1141	1167	yes	yes	2;3	2.27E-258	185.25	By MS/MS	By MS/MS	By MS/MS	2	1	1	1281100
GPSGEPGTAGPPGTPGPQGLLGAPGFLGLPGSR	GETGASGPPGFVGEKGPSGEPGTAGPPGTP	GLLGAPGFLGLPGSRGERGLPGVAGSVGEP	K	G	P	S	R	G	2	1	0	0	0	1	1	11	0	0	4	0	0	1	8	2	2	0	0	0	0	0	33	0	29,525,094	P02465	P02465	845	877	yes	yes	3	3.19E-07	82,157		By MS/MS			1		48367
GPSGEPGTAGPPGTPGPQGLLGAPGFLGLPGSRGER	GETGASGPPGFVGEKGPSGEPGTAGPPGTP	GAPGFLGLPGSRGERGLPGVAGSVGEPGPL	K	G	P	E	R	G	2	2	0	0	0	1	2	12	0	0	4	0	0	1	8	2	2	0	0	0	0	0	36	1	32,946,745	P02465	P02465	845	880	yes	yes	3	1.84E-12	85,097		By MS/MS			1		75867
GPSGPPGPDGNKGEPGVVGAPGTAGPSGPSGLPGER	GESGAAGPTGPIGSRGPSGPPGPDGNKGEP	GTAGPSGPSGLPGERGAAGIPGGKGEKGET	R	G	P	E	R	G	2	1	1	1	0	0	2	12	0	0	1	1	0	0	9	3	1	0	0	2	0	0	36	1	3,162,533	P02465	P02465	608	643	yes	yes	3;4	4.36E-06	92,188	By MS/MS	By MS/MS		3	4		844750
GPSGPQGPSGPPGPK	GAPGIAGAPGFPGARGPSGPQGPSGPPGPK	GPSGPQGPSGPPGPKGNSGEPGAPGSKGDT	R	G	P	P	K	G	0	0	0	0	0	1	0	5	0	0	0	1	0	0	6	2	0	0	0	0	0	0	15	0	13,156,521	P02453	P02453	415	429	yes	yes	2	1.81E-01	67,153			By MS/MS			7	0
GSAGPPGATGFPGAAGR	GPIGNVGAPGPKGARGSAGPPGATGFPGAA	AGPPGATGFPGAAGRVGPPGPSGNAGPPGP	R	G	S	G	R	V	4	1	0	0	0	0	0	6	0	0	0	0	0	1	3	1	1	0	0	0	0	0	17	0	14,266,953	P02453	P02453	865	881	yes	yes	2	7.46E-13	101.64		By MS/MS			1		91184
GSDGSVGPVGPAGPIGSAGPPGFPGAPGPK	GERGRVGAPGPAGARGSDGSVGPVGPAGPI	GSAGPPGFPGAPGPKGELGPVGNPGPAGPA	R	G	S	P	K	G	3	0	0	1	0	0	0	10	0	1	0	1	0	1	8	3	0	0	0	2	0	0	30	0	2,540,266	P02465	P02465	233	262	yes	yes	3	1.07E-55	126.75		By MS/MS			1		665660
GSDGSVGPVGPAGPIGSAGPPGFPGAPGPKGELGPVGNPGPAGPAGPR	GERGRVGAPGPAGARGSDGSVGPVGPAGPI	GPVGNPGPAGPAGPRGEVGLPGLSGPVGPP	R	G	S	P	R	G	5	1	1	1	0	0	1	16	0	1	1	1	0	1	13	3	0	0	0	3	0	0	48	1	41,210,719	P02465	P02465	233	280	yes	yes	4	0.0023487	51,587		By MS/MS			1		80660
GSEGPQGVRGEPGPPGPAGAAGPAGNPGADGQPGAK	GAVGAKGEGGPQGPRGSEGPQGVRGEPGPP	GPAGNPGADGQPGAKGANGAPGIAGAPGFP	R	G	S	A	K	G	6	1	1	1	0	2	2	12	0	0	0	1	0	0	8	1	0	0	0	1	0	0	36	1	31,184,817	P02453	P02453	361	396	yes	yes	3	0.0011977	50,444		By MS/MS			1		65936
GSPGEAGRPGEAGLPGAK	GPAGERGAPGPAGPKGSPGEAGRPGEAGLP	GEAGRPGEAGLPGAKGLTGSPGSPGPDGKT	K	G	S	A	K	G	3	1	0	0	0	0	2	6	0	0	1	1	0	0	3	1	0	0	0	0	0	0	18	1	16,068,063	P02453	P02453	520	537	yes	yes	3	1.32E-07	81,723		By MS/MS			5		0
GSPGERGEVGPAGPNGFAGPAGAAGQPGAKGER	GEAGPAGPAGPAGPRGSPGERGEVGPAGPN	GPAGAAGQPGAKGERGTKGPKGENGPVGPT	R	G	S	E	R	G	6	2	1	0	0	1	3	11	0	0	0	1	0	1	5	1	0	0	0	1	0	0	33	2	29,594,285	P02465	P02465	707	739	yes	yes	3;4	0.00015726	58.21		By MS/MS			2		1154100
GSQGSQGPAGPPGPPGPPGPPGPSGGGYEFGFDGDFYR	GRIGQPGAVGPAGIRGSQGSQGPAGPPGPP	SGGGYEFGFDGDFYRADQPRSPTSLRPKDY	R	G	S	Y	R	A	1	1	0	2	0	2	1	13	0	0	0	0	0	3	10	3	0	0	2	0	0	0	38	0	36,005,971	P02465	P02465	1079	1116	yes	yes	3	7.27E-12	80,693		By MS/MS			1		87300
GSTGEIGPAGPPGPPGLR	GQPGPPGPSGEEGKRGSTGEIGPAGPPGPP	GEIGPAGPPGPPGLRGNPGSRGLPGADGRA	R	G	S	L	R	G	1	1	0	0	0	0	1	6	0	1	1	0	0	0	5	1	1	0	0	0	0	0	18	0	16,158,318	P02465	P02465	380	397	yes	yes	2	0	317.44	By MS/MS	By MS/MS	By MS/MS	3	1	2	6322800
GSTGEIGPAGPPGPPGLRGNPGSR	GQPGPPGPSGEEGKRGSTGEIGPAGPPGPP	GPPGPPGLRGNPGSRGLPGADGRAGVMGPA	R	G	S	S	R	G	1	2	1	0	0	0	1	8	0	1	1	0	0	0	6	2	1	0	0	0	0	0	24	1	21,841,036	P02465	P02465	380	403	yes	yes	3	2.31E-259	190.88	By MS/MS		By MS/MS	2		1	3725900
GTKGPKGENGPVGPTGPVGAAGPSGPNGPPGPAGSR	GPAGAAGQPGAKGERGTKGPKGENGPVGPT	GPSGPNGPPGPAGSRGDGGPPGATGFPGAA	R	G	T	S	R	G	3	1	2	0	0	0	1	12	0	0	0	2	0	0	9	2	2	0	0	2	0	0	36	2	31,325,701	P02465	P02465	740	775	yes	yes	4	0.00052085	52,858	By MS/MS			2			120550
GTQGPPGATGFPGSAGR	GPHGPNGVPGLKGGRGTQGPPGATGFPGSA	QGPPGATGFPGSAGRVGPPGPAGAPGPAGP	R	G	T	G	R	V	2	1	0	0	0	1	0	6	0	0	0	0	0	1	3	1	2	0	0	0	0	0	17	0	15,137,274	F1N2Y2	F1N2Y2	901	917	yes	yes	2	0.0017245	62.14		By MS/MS			1		33611
GVGGLPGPLGPR	PGVGKPGFPGPKGDRGVGGLPGPLGPRGEK	GDRGVGGLPGPLGPRGEKGPVGAPGLGGPP	R	G	V	P	R	G	0	1	0	0	0	0	0	5	0	0	2	0	0	0	3	0	0	0	0	1	0	0	12	0	10,756,138	A7E303	A7E303	363	374	yes	yes	2	2.27E-32	155.75			By MS/MS			6	0
GVPGPPGAVGPAGK	GPKGAAGEPGKAGERGVPGPPGAVGPAGKD	RGVPGPPGAVGPAGKDGEAGAQGPPGPAGP	R	G	V	G	K	D	2	0	0	0	0	0	0	5	0	0	0	1	0	0	4	0	0	0	0	2	0	0	14	0	1,159,635	P02453	P02453	598	611	yes	yes	2	0.00028608	71,349		By MS/MS			1		102490
GVVGLPGQRGER	GAPGTPGPQGIAGQRGVVGLPGQRGERGFP	GQRGVVGLPGQRGERGFPGLPGPSGEPGKQ	R	G	V	E	R	G	0	2	0	0	0	1	1	4	0	0	1	0	0	0	1	0	0	0	0	2	0	0	12	1	12,236,735	P02453	P02453	958	969	yes	yes	2	0.00038208	84,213			By MS/MS			1	103790
IAEGVPQLLIVLTADR	EFVLRNILVGSAGSRIAEGVPQLLIVLTAD	AEGVPQLLIVLTADRSGDDVRGPSVVLRRG	R	I	A	D	R	S	2	1	0	1	0	1	1	1	0	2	3	0	0	0	1	0	1	0	0	2	0	0	16	0	17,069,931	G3N3E4;E1BB91;G3N126	G3N3E4	1125	1140	yes	no	2	0.0038613	62.89			By MS/MS			1	46360
IGQPGAVGPAGIR	RGPAGPSGPAGKDGRIGQPGAVGPAGIRGS	GRIGQPGAVGPAGIRGSQGSQGPAGPPGPP	R	I	G	I	R	G	2	1	0	0	0	1	0	4	0	2	0	0	0	0	2	0	0	0	0	1	0	0	13	0	11,916,724	P02465	P02465	1066	1078	yes	yes	2	1.71E-132	191.85		By MS/MS	By MS/MS		1	1	1678100
IITHPNFNGNTLDNDIMLIK	IDVLEGNEQFINAAKIITHPNFNGNTLDND	NFNGNTLDNDIMLIKLSSPATLNSRVATVS	K	I	I	I	K	L	0	0	4	2	0	0	0	1	1	4	2	1	1	1	1	0	2	0	0	0	0	0	20	0	22,821,729	CON__P00761	CON__P00761	78	97	yes	yes	3	0.00020589	67,995			By MS/MS			1	85616
ISSVPAISSR	FNISNLLVLHLSHNRISSVPAISSRLEHLY	LSHNRISSVPAISSRLEHLYLNNNSIEKIN	R	I	S	S	R	L	1	1	0	0	0	0	0	0	0	2	0	0	0	0	1	4	0	0	0	1	0	0	10	0	10,155,662	Q9GKN8;F1MX63	Q9GKN8	302	311	yes	no	2	4.14E-24	109.48			By MS/MS			1	64405
LELPGSREAGEGPEDLADGGPLLYR	VISSVYTQMQPLPGRLELPGSREAGEGPED	EGPEDLADGGPLLYRARGPLTDPGASPSNG	R	L	E	Y	R	A	2	2	0	2	0	0	4	5	0	0	5	0	0	0	3	1	0	0	1	0	0	0	25	1	26,102,926	F1N670	F1N670	413	437	yes	yes	3	7.92E-06	68.42	By MS/MS			1			1977100
LGEHNIDVLEGNEQFINAAK	VVSAAHCYKSRIQVRLGEHNIDVLEGNEQF	IDVLEGNEQFINAAKIITHPNFNGNTLDND	R	L	G	A	K	I	2	0	3	1	0	1	3	2	1	2	2	1	0	1	0	0	0	0	0	1	0	0	20	0	22,100,968	CON__P00761	CON__P00761	58	77	yes	yes	3	9.04E-111	118.52	By MS/MS			1			256650
LGVPGLPGYPGR	TGDPGPPGQAGEKGKLGVPGLPGYPGRQGP	KGKLGVPGLPGYPGRQGPKGSTGFPGFPGA	K	L	G	G	R	Q	0	1	0	0	0	0	0	4	0	0	2	0	0	0	3	0	0	0	1	1	0	0	12	0	11,816,557	F1N0K0	F1N0K0	848	859	no	no	2	0.00032228	77,923		By MS/MS			1		75884
LPIGSYI	VILGKHPNSFICLKRLPIGSYI________	NSFICLKRLPIGSYI_______________	R	L	P	Y	I	-	0	0	0	0	0	0	0	1	0	2	1	0	0	0	1	1	0	0	1	0	0	0	7	0	76,143,234	P19879;A5D9E8;G3N088	P19879	293	299	yes	no	1	3.33E-41	119.23			By MS/MS			1	530420
LSSPATLNSR	NFNGNTLDNDIMLIKLSSPATLNSRVATVS	IMLIKLSSPATLNSRVATVSLPRSCAAAGT	K	L	S	S	R	V	1	1	1	0	0	0	0	0	0	0	2	0	0	0	1	3	1	0	0	0	0	0	10	0	10,445,564	CON__P00761	CON__P00761	98	107	yes	yes	2	4.63E-35	120.15			By MS/MS			1	58103
LVDYLDVGFDTTR	SAGPEFQYIRTLIERLVDYLDVGFDTTRVA	ERLVDYLDVGFDTTRVAVIQFSDDPRVEFL	R	L	V	T	R	V	0	1	0	3	0	0	0	1	0	0	2	0	0	1	0	0	2	0	1	2	0	0	13	0	1,512,746	G3N3E4;E1BB91;G3N126	G3N3E4	1255	1267	yes	no	2	2.46E-02	95,573			By MS/MS			3	0
MGLGNGRRSMK	______________________________	______________________________	M	M	G	M	K	S	0	2	1	0	0	0	0	3	0	0	1	1	2	0	0	1	0	0	0	0	0	0	11	2	12,056,121	E1BLA8	E1BLA8	2	12	yes	yes	2	0.00047531	83,265	By MS/MS			2			2374500
NIQTRYLLDEYSAK	PFYQKRHKHFDQSYRNIQTRYLLDEYSAKK	RNIQTRYLLDEYSAKKKRASAQSSLQRSVT	R	N	I	A	K	K	1	1	1	1	0	1	1	0	0	1	2	1	0	0	0	1	1	0	2	0	0	0	14	1	17,128,733	E1BF23	E1BF23	22	35	yes	yes	2	2.48E-03	85,355	By MS/MS			1			185940
PAQPCKDIYHKGNFCLHCLYNPPR				P	A	P	R		1	1	2	1	3	1	0	1	2	1	2	2	0	1	4	0	0	0	2	0	0	0	24	2	29,843,996		REV__E1BIP9			yes	yes	3	7.93E-01	58,712	By MS/MS			1			290610
PGPAGPPGSQGPR	GEPGLVPVVTGIRGRPGPAGPPGSQGPRGE	GRPGPAGPPGSQGPRGERGPKGKPGPRGPQ	R	P	G	P	R	G	1	1	0	0	0	1	0	4	0	0	0	0	0	0	5	1	0	0	0	0	0	0	13	0	11,735,891	F1N2Y2	F1N2Y2	130	142	yes	yes	1	8.50E-03	88,948	By MS/MS			2			63176
PGPIGPAGAR	AGKEGPVGLPGIDGRPGPIGPAGARGEPGN	GIDGRPGPIGPAGARGEPGNIGFPGPKGPS	R	P	G	A	R	G	2	1	0	0	0	0	0	3	0	1	0	0	0	0	3	0	0	0	0	0	0	0	10	0	89,149,265	P02465	P02465	475	484	yes	yes	2	0.0030627	47,849	By MS/MS			1			22720
PGPRGQRPTGPR	PGANGEKGARGVAGKPGPRGQRPTGPRGSR	AGKPGPRGQRPTGPRGSRGARGPTGKPGPK	K	P	G	P	R	G	0	3	0	0	0	1	0	3	0	0	0	0	0	0	4	0	1	0	0	0	0	0	12	2	12,746,956	F1N0K0	F1N0K0	887	898	yes	yes	2	0.012195	53,775	By MS/MS			1			5055.3
RGSTGEIGPAGPPGPPGLR	VGQPGPPGPSGEEGKRGSTGEIGPAGPPGP	GEIGPAGPPGPPGLRGNPGSRGLPGADGRA	K	R	G	L	R	G	1	2	0	0	0	0	1	6	0	1	1	0	0	0	5	1	1	0	0	0	0	0	19	1	17,719,329	P02465	P02465	379	397	yes	yes	3	3.67E-02	83,894			By MS/MS			1	49165
RGSTGEIGPAGPPGPPGLRGNPGSR	VGQPGPPGPSGEEGKRGSTGEIGPAGPPGP	GPPGPPGLRGNPGSRGLPGADGRAGVMGPA	K	R	G	S	R	G	1	3	1	0	0	0	1	8	0	1	1	0	0	0	6	2	1	0	0	0	0	0	25	2	23,402,047	P02465	P02465	379	403	yes	yes	4	3.27E-02	71,002		By MS/MS			1		192050
SAMPADAPLCLR	SKLQVLRLDGNEIKRSAMPADAPLCLRLAS	IKRSAMPADAPLCLRLASLIEI________	R	S	A	L	R	L	3	1	0	1	1	0	0	0	0	0	2	0	1	0	2	1	0	0	0	0	0	0	12	0	13,006,268	E1BI02;P13605	E1BI02	357	368	yes	no	2	0.00089823	64.04			By MS/MS			2	80264
SGDRGETGPAGPAGPIGPVGAR	PGAPGAPGPVGPAGKSGDRGETGPAGPAGP	GPAGPAGPIGPVGARGPAGPQGPRGDKGET	K	S	G	A	R	G	3	2	0	1	0	0	1	7	0	1	0	0	0	0	4	1	1	0	0	1	0	0	22	1	19,749,872	P02453	P02453	1062	1083	yes	yes	3	0.0011904	53,779	By matching	By MS/MS		1	2		423360
SGETGASGPPGFVGEKGPSGEPGTAGPPGTPGPQGLLGAPGFLGLPGSR	EGLRGPRGDQGPVGRSGETGASGPPGFVGE	GLLGAPGFLGLPGSRGERGLPGVAGSVGEP	R	S	G	S	R	G	3	1	0	0	0	1	3	16	0	0	4	1	0	2	10	4	3	0	0	1	0	0	49	1	4,410,188	P02465	P02465	829	877	yes	yes	3	0.00016435	57,671	By MS/MS			1			9547
STGISVPGPMGPSGPR	GGNFAPQLSYGYDEKSTGISVPGPMGPSGP	TGISVPGPMGPSGPRGLPGPPGAPGPQGFQ	K	S	T	P	R	G	0	1	0	0	0	0	0	4	0	1	0	0	1	0	4	3	1	0	0	1	0	0	16	0	14,957,453	P02453	P02453	171	186	yes	yes	2	2.83E-233	184.58	By MS/MS	By MS/MS	By MS/MS	3	4	2	2790900
TGPPGPSGISGPPGPPGPAGK	GGPPGATGFPGAAGRTGPPGPSGISGPPGP	SGISGPPGPPGPAGKEGLRGPRGDQGPVGR	R	T	G	G	K	E	1	0	0	0	0	0	0	7	0	1	0	1	0	0	8	2	1	0	0	0	0	0	21	0	17,809,108	P02465	P02465	793	813	yes	yes	3	1.92E-03	88,385	By MS/MS	By MS/MS	By matching	1	2	1	346200
VGPPGPSGNAGPPGPPGPAGK	AGPPGATGFPGAAGRVGPPGPSGNAGPPGP	SGNAGPPGPPGPAGKEGSKGPRGETGPAGR	R	V	G	G	K	E	2	0	1	0	0	0	0	7	0	0	0	1	0	0	8	1	0	0	0	1	0	0	21	0	17,638,955	P02453	P02453	882	902	yes	yes	2;3	4.20E-148	198.78		By MS/MS			7		298900
VGPPGPSGNAGPPGPPGPAGKEGSKGPR	AGPPGATGFPGAAGRVGPPGPSGNAGPPGP	GPPGPAGKEGSKGPRGETGPAGRPGEVGPP	R	V	G	P	R	G	2	1	1	0	0	0	1	9	0	0	0	2	0	0	9	2	0	0	0	1	0	0	28	2	24,752,619	P02453	P02453	882	909	yes	yes	4	9.30E-54	122.22		By MS/MS			1		1380200
[truncated: 21 more columns]
