# Supplementary material for: Proteomic Analysis of Decellularized Extracellular Matrix: Achieving a Competent Biomaterial for Osteogenesis
Source: Biomed Res Int. 2022 Oct 11;2022:6884370. doi: 10.1155/2022/6884370 (PMC9578822; doi:10.1155/2022/6884370)
Supplement: Supplementary Materials — Supporting Information: an independent file is provided containing the following detailed information: Table S1: mass spectrometry-based protein identification and posttranslational modification data and Gene Ontology annotation for protein subsets identified in the different samples analyzed. Supp S1a: protein identifications by shotgun mass spectrometry. Supp S1b: identifications of proteins with the following posttranslational modifications: Cys-Cys, hydroxyproline, sulfation (Y), deamination (N), phosphorylation (ST), and oxidation (M). Supp T2c: Gene Ontology enriched categories for the whole set of identified proteins. Supp T2d: Gene Ontology enriched categories for the set of proteins with identified posttranslational modifications (PTMs). Supp T2e: set of all peptides identified by shotgun mass spectrometry. Supp T2f: set of peptides identified in proteins with posttranslational modifications (PTMs). Supp T2g: Gene Ontology annotation for the whole set of identified proteins. Supp T2h: Gene Ontology annotation for the set of proteins with posttranslational modifications (PTMs). Supp T2i: GO terms enriched for the set of proteins identified in the ECMt. Supp T2j: GO terms enriched for the set of proteins identified in the ECMb. Supp T2k: GO enriched for the set of proteins identified in the ECMp. Table S2: significance values for cell adhesion and proliferation assays. Significant p values for Student's t-test (α = 0.05): (a) cell adhesion after 4 h of incubation and (b) cell proliferation after 4, 8, 12, and 15 days. These measurements were performed using the Alamar Blue assay (BMMSCs MO-58) after continuous and stepwise digestion with trypsin, collagenase, and pepsin. Table S3: significance values for peptides and glycosaminoglycan quantification. Significant p values for Student's t-test (α = 0.05) in order to compare: (a–c) peptide quantification using BCA assay and (d, e) GAG quantification using DMMB assay, performed under continuous and stepwise diges [file 6884370.f1.zip › Suppl Table S2h. PROTEOMICS DATA.txt]

Supp table 2h. Functional annotation of proteins with detected Post-translational modifications (PTMs) in ECMs
Protein IDs	PrimeiroDeGO_ID	PrimeiroDeDescription	Sequence coverage %	LFQ intensity col eluido-_2-D,1_01_2589	LFQ intensity ECMo eluido-_2-D,3_01_2591	LFQ intensity ECMp eluido-_2-D,2_01_2590	Cys-Cys site positions	Deamidation (N) site positions	Hydroxyproline site positions	Oxidation (M) site positions	Phospho (ST) site positions	Sulfation (Y) site positions
A6QP44	GO:0005524	FUK protein	1.1	0	0	0					654
A7E303	GO:0005576	COL8A1 protein	1.6	0	0	0			368
E1BF23	GO:0005859	Myomesin 2	1	185940	0	0		22				32
E1BI02			3.2	0	0	271830				359
E1BLA8	GO:0005794	Golgi membrane protein 1	2.7	2231600	0	0				2;11
F1MSR8			3.1	290800	0	0			929;931;949;952;955;956;965
F1MW01	GO:0000070	Extra spindle pole bodies like 1, separase	0.8	0	0	140400
F1N0K0	GO:0001502	Collagen alpha-1(XI) chain	1.3	0	68814	0
F1N2Y2	GO:0001501	Collagen type V alpha 2 chain	2.9	154980	0	0			130;135;136;141
F1N670	GO:0003700	IKAROS family zinc finger 4	4.3	1977100	0	0			425			436
G3MX46	GO:0000122	Capicua transcriptional repressor	1.2	0	0	2697800				2058	2044
G3N2V3	GO:0005509	C2 calcium dependent domain containing 4C	5	0	0	2134400					36
G3N3E4			2.3	0	0	402060
P00978	GO:0004867	Protein AMBP	2.3	0	0	159680
P02453	GO:0001568	Collagen alpha-1(I) chain	49.1	17998000	19126000	5030100		294;399;854;890	281;284;288;291;297;302;333;342;402;408;411;428;450;459;474;480;482;483;495;503;522;528;534;543;546;548;767;770;771;773;777;785;798;806;807;816;822;839;840;849;851;858;860;870;876;884;885;894;897;918;923;924;927;929;936;945;948;972;975;986;995;996;998;100	180;300;728;999
P02465	GO:0001501	Collagen alpha-2(I) chain	53	64861000	45336000	55590000		270;399;456;489;688;748;766;916		415;445	829;832;835
P04258	GO:0005576	Collagen alpha-1(III) chain	9.1	0	0	1964100			260;263;269;779;781;784;785;788;839;845;854
P19879	GO:0005615	Mimecan	2.3	0	0	3107000
Q05443	GO:0005518	Lumican	2.3	0	0	176450
Q9GKN8	GO:0005201	Prolargin	2.6	0	0	377260
